# Supplementary material for: Potential factors causing failure of whole plant nettle (Urtica cannabina) silages
Source: Front Microbiol. 2023 Jan 11;13:1113050. doi: 10.3389/fmicb.2022.1113050 (PMC9876617; doi:10.3389/fmicb.2022.1113050)
Supplement: Supplementary file 1 [file Table_1.xlsx]

## Sheet: Sheet1
ID	Metabolite	Metab ID	KEGG Compound ID	Library ID	M/Z	Mode	Adducts	Formula	Retention time	RSD	Fragmentation Score	Theoretical Fragmentation Score	Mass Error	CAS ID	KEGG Compound First Category	KEGG Compound Second Category	KEGG Pathway ID	KEGG Pathway Description	KEGG Pathway First Category	KEGG Pathway Second Category	HMDB Superclass	HMDB Class	HMDB Subclass	QM0K_1	QM0K_2	QM0K_3	QM0K_4	QM0K_5	QM7K_1	QM7K_2	QM7K_3	QM7K_4	QM7K_5	QM15K_1	QM15K_2	QM15K_3	QM15K_4	QM15K_5	QM30K_1	QM30K_2	QM30K_3	QM30K_4	QM30K_5	QM60K_1	QM60K_2	QM60K_3	QM60K_4	QM60K_5	QM90K_1
pos_6	Sucrose	metab_5	C00089	HMDB0000258	365.105	pos	M+H-H2O, M+H, M+NH4, M+Na, M+H-2H2O	C12H22O11	1.0934	0.0292802	80.8	-	-1.08812	57-50-1	Carbohydrates	Oligosaccharides	map01100;map01110;map04973;map02010;map00052;map00500;map02060;map04742	Metabolic pathways; Biosynthesis of secondary metabolites; Carbohydrate digestion and absorption; ABC transporters; Galactose metabolism; Starch and sucrose metabolism; Phosphotransferase system (PTS); Taste transduction	Metabolism;Metabolism;Organismal Systems;Environmental Information Processing;Metabolism;Metabolism;Environmental Information Processing;Organismal Systems	Global and overview maps;Global and overview maps;Digestive system;Membrane transport;Carbohydrate metabolism;Carbohydrate metabolism;Membrane transport;Sensory system	Organic oxygen compounds	Organooxygen compounds	Carbohydrates and carbohydrate conjugates	7.6496	7.6733	7.6553	7.6208	7.6337	6.2989	6.211	6.7314	6.8006	7.0757	6.328	5.5312	6.7188	6.4372	6.3233	5.5836	6.2354	5.7784	6.0689	6.0026	5.1412	5.3298	5.1623	4.8675	5.742	4.5348
pos_9	Isovitexin	metab_8	C01714	LMPK12110338	433.113	pos	M+H, M+K, M+Na, M+H-H2O, M+H-2H2O	C21H20O10	4.5166	0.0305972	91.2	-	-0.762231	-	-	-	map00944	Flavone and flavonol biosynthesis	Metabolism	Biosynthesis of other secondary metabolites	-	-	-	7.333	7.2056	7.5899	7.3306	6.9097	7.0159	6.8994	7.5109	6.9489	6.9951	7.2764	7.1366	7.2798	7.1196	7.1648	6.9079	6.9024	7.0925	7.0556	6.8713	7.0264	6.6123	6.963	6.6654	6.7651	6.5054
pos_11	1,2-Anhydridoniveusin	metab_10	-	HMDB0032105	341.138	pos	M+H-2H2O, 2M+Na, M+Na, M+K, M+H-H2O	C20H24O7	4.0678	0.0275525	-	71.4	-1.00957	121519-08-2	-	-	-	-	-	-	Lipids and lipid-like molecules	Fatty Acyls	Fatty acid esters	6.1854	6.3203	6.3626	6.3865	6.1982	7.1371	7.049	7.3794	6.5756	6.8215	7.1275	6.9945	7.2662	7.1944	7.1485	7.1729	7.1838	7.2285	7.167	7.2006	6.9193	6.9406	6.964	6.885	6.864	6.0799
pos_27	Austroinulin	metab_26	-	HMDB0036802	364.284	pos	M+ACN+H, M+ACN+Na, M+NH4, M+H-H2O	C20H34O3	6.4847	0.029518	-	54.7	-1.91556	62868-75-1	-	-	-	-	-	-	Lipids and lipid-like molecules	Prenol lipids	Diterpenoids	5.6848	5.8018	5.7687	5.6962	5.6278	6.4842	6.4177	6.3214	6.4853	6.401	6.4535	6.5364	6.498	6.4668	6.641	6.5203	6.4956	6.5324	6.4565	6.4941	6.4399	6.5202	6.52	6.4767	6.5668	6.5416
pos_29	13(S)-HpOTrE	metab_28	C04785	-	293.211	pos	M+H-H2O, M+H, M+ACN+H, M+Na	C18H30O4	6.75	0.0633514	68.7	-	-1.21142	-	-	-	map01100;map00592;map01110	Metabolic pathways; alpha-Linolenic acid metabolism; Biosynthesis of secondary metabolites	Metabolism;Metabolism;Metabolism	Global and overview maps;Lipid metabolism;Global and overview maps	-	-	-	7.6273	7.7003	7.6244	7.7776	7.5422	7.8866	7.8418	7.8841	7.9457	7.942	7.8529	7.824	7.8232	7.7428	7.7657	7.6799	7.76	7.7885	7.682	7.7184	7.6089	7.7431	7.7545	7.6606	7.6636	7.6134
pos_33	DG(18:0/18:2(9Z,12Z)/0:0)	metab_32	-	HMDB0007161	638.571	pos	M+NH4, M+Na, M+H, M+H-H2O	C39H72O5	7.5622	0.101371	-	74.7	-0.75497	-	-	-	-	-	-	-	Lipids and lipid-like molecules	Fatty Acyls	Lineolic acids and derivatives	7.443	7.3295	7.3942	7.3124	7.4684	7.4764	7.4838	7.5083	7.4274	7.4864	7.4597	7.5134	7.4741	7.5064	7.4804	7.4571	7.5236	7.4643	7.5396	7.461	7.4693	7.5227	7.4318	7.548	7.4375	7.5476
pos_39	16-Hydroxy-10-oxohexadecanoic acid	metab_38	-	HMDB0041287	309.206	pos	M+H-2H2O, M+Na, M+H-H2O, M+H	C16H30O4	6.1985	0.0345837	-	68.6	-0.788358	53833-25-3	-	-	-	-	-	-	Lipids and lipid-like molecules	Fatty Acyls	Fatty acids and conjugates	6.9079	6.9945	6.9822	6.9836	6.8009	7.1723	7.2582	7.0543	7.2594	7.2296	7.0948	7.0858	7.0511	7.0243	7.0117	6.9072	6.9525	6.971	6.927	6.8875	6.855	6.8568	6.9522	6.861	6.832	6.7542
pos_45	1-Cyclopropyl-4-methyl-1,3-cyclohexanediol	metab_44	-	HMDB0036992	135.117	pos	M+H-2H2O, M+Na, M+ACN+H, M+NH4	C10H18O2	5.9607	0.0207434	-	53.4	-0.123113	83133-21-5	-	-	-	-	-	-	Organic oxygen compounds	Organooxygen compounds	Alcohols and polyols	5.984	6.098	5.9094	5.9437	5.7758	6.0076	6.0793	6.0062	6.1118	6.0657	6.0798	6.0297	6.0878	6.084	6.0742	6.1497	6.145	6.1858	6.1526	6.1418	6.1383	6.1622	6.1937	6.1383	6.1361	6.1589
pos_107	Trigonelline	metab_106	C01004	HMDB0000875	138.055	pos	M+H, 2M+K, 2M+H	C7H7NO2	0.5577	0.0421752	75.8	-	-0.396975	535-83-1	-	-	map00760	Nicotinate and nicotinamide metabolism	Metabolism	Metabolism of cofactors and vitamins	Alkaloids and derivatives	Not Available	Not Available	7.5318	7.4365	7.4774	7.4617	7.4791	7.3746	7.3778	7.3182	7.3573	7.338	7.3567	7.3427	7.3752	7.3771	7.3758	7.4261	7.4014	7.3888	7.405	7.4046	7.4313	7.4195	7.4485	7.4445	7.4172	7.3998
pos_129	Guanine	metab_128	C00242	HMDB0000132	152.057	pos	M+H, M+K, M+Na	C5H5N5O	1.3306	0.0412379	83.4	-	-0.43525	73-40-5	Nucleic acids	Bases	map01100;map00230	Metabolic pathways; Purine metabolism	Metabolism;Metabolism	Global and overview maps;Nucleotide metabolism	Organoheterocyclic compounds	Imidazopyrimidines	Purines and purine derivatives	6.2062	6.1918	6.225	6.1589	6.2521	6.4511	6.6273	6.8319	6.5983	6.738	6.0642	6.0834	6.2121	5.9187	6.0153	5.5816	5.6893	5.6043	5.388	5.7909	5.5559	5.5017	5.3137	5.2544	5.6244	5.4654
pos_131	P-Tolualdehyde	metab_130	C06758	HMDB0029638	121.065	pos	M+H, M+NH4, M+H-H2O	C8H8O	1.4128	0.0284949	88.1	-	1.04653	104-87-0	-	-	map01100;map01220;map00622;map01120	Metabolic pathways; Degradation of aromatic compounds; Xylene degradation; Microbial metabolism in diverse environments	Metabolism;Metabolism;Metabolism;Metabolism	Global and overview maps;Global and overview maps;Xenobiotics biodegradation and metabolism;Global and overview maps	Benzenoids	Benzene and substituted derivatives	Benzoyl derivatives	5.8357	5.7956	5.7599	5.8084	5.7892	7.346	7.3846	7.3881	7.0976	7.2507	7.5731	7.6727	7.6156	7.6848	7.6475	7.779	7.76	7.7817	7.7647	7.7546	7.7967	7.8034	7.849	7.7876	7.7802	7.588
pos_149	N-ACETYLPROLINE	metab_148	-	HMDB0094701	158.081	pos	M+H-H2O, M+Na, M+H	C7H11NO3	2.4552	0.0263988	61.8	-	-0.392594	68-95-1	-	-	-	-	-	-	Organic acids and derivatives	Carboxylic acids and derivatives	Amino acids, peptides, and analogues	6.266	6.361	6.3832	6.3688	6.3953	6.4836	6.5032	6.425	6.4833	6.453	6.4691	6.428	6.4561	6.483	6.4665	6.4992	6.4772	6.4689	6.4717	6.4854	6.5514	6.5444	6.5822	6.528	6.5549	6.541
pos_153	Cis-zeatin-9-N-glucoside	metab_152	-	HMDB0012202	404.152	pos	M+H, M+Na, M+H-H2O	C16H23N5O6	2.6722	0.0293916	61.6	-	-4.33922	169565-72-4	-	-	-	-	-	-	Organic oxygen compounds	Organooxygen compounds	Carbohydrates and carbohydrate conjugates	6.173	6.5539	6.4512	6.4476	6.1903	5.3488	5.538	5.7131	5.7318	5.9835	5.5543	4.991	5.6456	5.3827	5.2991	5.0143	5.112	5.1819	4.8996	5.1645	4.5852	3.5359	4.2137	3.5298	5.3388	4.3189
pos_165	5-Hydroxyindoleacetic acid	metab_164	C05635	HMDB0000763	233.092	pos	M+H, M+ACN+H, M+H-H2O	C10H9NO3	3.2541	0.0593185	86.1	-	-0.780106	54-16-0	-	-	map01100;map04726;map00380	Metabolic pathways; Serotonergic synapse; Tryptophan metabolism	Metabolism;Organismal Systems;Metabolism	Global and overview maps;Nervous system;Amino acid metabolism	Organoheterocyclic compounds	Indoles and derivatives	Indolyl carboxylic acids and derivatives	4.4768	4.3725	4.446	4.488	4.4251	4.3894	4.3729	4.3863	4.3721	4.3894	4.5841	4.6252	4.759	4.6784	4.8209	4.9662	4.9991	5.0574	4.9738	4.9839	5.7694	5.9827	6.0062	6.1719	6.0768	6.1444
pos_166	Pantothenic Acid	metab_165	C00864	HMDB0000210	220.118	pos	M+H-H2O, M+H, M+H-2H2O	C9H17NO5	3.3381	0.0212875	82.7	-	-0.624245	79-83-4	Vitamins and Cofactors	Vitamins	map01100;map01110;map00770;map00410;map04977	Metabolic pathways; Biosynthesis of secondary metabolites; Pantothenate and CoA biosynthesis; beta-Alanine metabolism; Vitamin digestion and absorption	Metabolism;Metabolism;Metabolism;Metabolism;Organismal Systems	Global and overview maps;Global and overview maps;Metabolism of cofactors and vitamins;Metabolism of other amino acids;Digestive system	Organic oxygen compounds	Organooxygen compounds	Alcohols and polyols	7.5378	7.8097	7.7297	7.7253	7.6396	7.6642	7.7475	7.6654	7.7316	7.7558	7.8066	7.6789	7.7249	7.7392	7.6901	7.6874	7.6766	7.6541	7.6768	7.6543	7.6339	7.6572	7.6617	7.6457	7.6539	7.6416
pos_177	Cynaratriol	metab_176	-	HMDB0034983	265.143	pos	M+H-H2O, M+ACN+H, M+Na	C15H22O5	3.8018	0.028035	-	70.7	-1.20261	70894-20-1	-	-	-	-	-	-	Lipids and lipid-like molecules	Prenol lipids	Terpene lactones	5.5007	5.7003	5.8364	5.4883	5.462	5.7613	5.8513	5.7003	5.916	5.9269	5.9121	5.7452	5.958	5.9032	5.8129	5.8719	5.8614	5.8452	5.8501	5.927	5.8326	5.8636	5.9083	5.8211	5.9832	5.8557
pos_178	Epi-4'-hydroxyjasmonic acid	metab_177	-	LMFA02020008	227.128	pos	M+H, M+Na, M+H-2H2O	C12H18O4	3.9418	0.0287641	58.8	-	-0.561784	-	-	-	-	-	-	-	-	-	-	5.711	5.4718	5.4306	5.254	5.3458	5.5269	5.7165	5.4922	5.8389	5.5657	5.5627	5.6137	5.6224	5.6249	5.5903	5.5745	5.5797	5.5433	5.5465	5.5991	5.6668	5.642	5.6838	5.5708	5.6369	5.6079
pos_189	N2-Malonyl-D-tryptophan	metab_188	C03414	-	291.097	pos	M+H, M+Na, M+H-H2O	C14H14N2O5	4.3829	0.0362182	66.8	-	-1.25503	-	-	-	-	-	-	-	-	-	-	6.2313	6.2685	6.1899	6.2774	6.2084	5.7813	5.9741	5.8674	5.7324	5.8926	6.0173	5.7988	5.9321	6.0084	5.8636	5.941	5.9248	5.8788	5.9292	5.9105	5.7844	5.745	5.7259	5.7508	5.7114	5.7379
pos_200	Diosmin	metab_199	C10039	HMDB0029548	609.181	pos	M+H, M+K, M+Na	C28H32O15	4.8959	0.0208466	80	-	-0.470414	520-27-4	-	-	-	-	-	-	Phenylpropanoids and polyketides	Flavonoids	Flavonoid glycosides	7.7388	7.5457	7.4755	7.6952	7.6389	7.3697	7.3035	7.3376	7.2857	7.2056	7.2421	7.1367	7.1074	7.1782	7.0805	7.3203	7.1684	7.2123	7.2968	7.1289	7.1619	7.1952	7.1516	7.2065	7.0688	7.0285
pos_221	13,14-Dihydro PGF-1a	metab_220	-	HMDB0005076	381.261	pos	M+H-2H2O, M+H-H2O, M+Na	C20H38O5	6.2263	0.0442772	-	85.4	-0.84695	-	-	-	-	-	-	-	Lipids and lipid-like molecules	Fatty Acyls	Eicosanoids	3.9563	4.4641	4.5224	4.4373	4.4011	5.8218	5.812	5.8046	5.7746	5.8387	5.8587	5.8358	5.9164	5.8233	5.8253	5.9023	5.8672	5.8975	5.8807	5.8512	5.9084	5.989	6.0067	5.9776	5.9625	5.9833
pos_230	(3S,3'S,5R,5'R,6R)-3,6-Epoxy-5,6-dihydro-3',5,8'-trihydroxy-beta,kappa-caroten-6'-one	metab_229	-	HMDB0037795	599.41	pos	M+H-2H2O, M+H, M+H-H2O	C40H56O5	6.4007	0.031644	-	70.7	0.36196	256505-53-0	-	-	-	-	-	-	Lipids and lipid-like molecules	Prenol lipids	Tetraterpenoids	7.3595	7.2079	7.2211	7.2614	7.0881	7.1576	7.0459	7.1056	7.2659	7.1946	7.2733	7.2522	7.0398	7.0377	7.1189	7.0468	7.1533	7.1749	7.1866	7.0936	6.7403	6.7318	6.9141	6.8203	6.8497	6.9237
pos_235	Gingerglycolipid A	metab_234	-	LMGL04010019;HMDB0041093	699.356	pos	M+Na, M+K, M+NH4	C33H56O14	6.3937	0.0498615	-	73.6	-0.719982	145937-22-0	-	-	-	-	-	-	Lipids and lipid-like molecules	Glycerolipids	Glycosylglycerols	7.5532	7.3265	7.4153	7.4696	7.4945	6.7332	6.5464	6.7889	6.3729	6.6936	6.3745	6.3055	6.5291	6.332	6.2951	6.1894	6.179	6.1776	6.2858	6.3243	4.7898	6.0488	5.8597	5.9904	6.3244	5.594
pos_244	5-Deoxydiplosporin	metab_243	-	HMDB0030681	458.254	pos	M+H-2H2O, 2M+ACN+H, M+CH3OH+H	C12H16O3	6.6247	0.121344	-	71.8	-0.0324315	-	-	-	-	-	-	-	Organoheterocyclic compounds	Pyrans	Pyranones and derivatives	6.0759	5.9749	5.9478	5.8919	5.8224	5.8598	5.9794	5.8907	6.049	5.8698	5.9513	5.9189	5.8084	5.9626	5.9209	5.869	5.8833	5.8761	5.9914	5.9845	6.0727	5.904	5.806	5.9916	5.937	5.988
pos_246	Corchorifatty acid A	metab_245	-	HMDB0032664	291.195	pos	M+H-H2O, M+H, M+H-2H2O	C18H28O4	6.7151	0.0420069	-	71.3	-1.05513	-	-	-	-	-	-	-	Lipids and lipid-like molecules	Fatty Acyls	Lineolic acids and derivatives	7.5002	7.6138	7.5516	7.6002	7.3015	7.6955	7.6944	7.5735	7.8451	7.7604	7.7074	7.7299	7.6363	7.6038	7.6407	7.4619	7.5776	7.5902	7.4732	7.5457	7.3907	7.3656	7.4797	7.349	7.3164	7.0829
pos_247	9,12,15-Octadecatrien-1-ol	metab_246	-	LMFA05000216	282.279	pos	M+H, M+NH4, M+H-H2O	C18H32O	6.6596	0.0700263	63	-	-0.920561	-	-	-	-	-	-	-	-	-	-	8.7298	8.7173	8.6484	8.7266	8.7643	8.7338	8.5658	8.7887	8.6922	8.7055	8.6481	8.5968	8.748	8.6892	8.7702	8.7211	8.7523	8.6574	8.7062	8.6038	8.6808	8.7468	8.6687	8.6687	8.7008	8.5676
pos_257	Sebacic acid	metab_256	C08277	HMDB0000792;LMFA01170006	203.128	pos	M+H-H2O, M+H, M+H-2H2O	C10H18O4	7.0226	0.0726253	91.5	-	-1.61655	111-20-6	-	-	-	-	-	-	Lipids and lipid-like molecules	Fatty Acyls	Fatty acids and conjugates	6.5485	6.4731	6.478	6.4618	6.5111	6.5636	6.4904	6.5628	6.5027	6.5448	6.5272	6.487	6.5393	6.5132	6.5458	6.4903	6.5396	6.5022	6.5142	6.5227	6.4985	6.5451	6.4661	6.5674	6.5053	6.534
pos_258	Cer(d16:2(4E,6E)/20:1(11Z)(2OH))	metab_257	-	LMSP02010090	578.514	pos	M+H, M+Na, M+H-H2O	C36H67NO4	7.1135	0.0305479	58	-	-0.505555	-	-	-	-	-	-	-	-	-	-	4.5235	3.96	4.6097	4.1279	4.6109	6.6912	6.9649	6.6005	6.3543	6.4904	6.7558	6.8315	6.7993	6.8904	6.6681	7.043	6.9304	6.9592	6.9915	7.0469	7.1591	7.2168	7.2419	7.2057	7.2135	7.3288
pos_290	Prostaglandin F1a	metab_289	C06475	HMDB0002685	321.242	pos	M+H-2H2O, M+Na, M+ACN+H	C20H36O5	6.6107	0.0563231	-	66.4	-0.86646	745-62-0	Lipids	Eicosanoids	-	-	-	-	Lipids and lipid-like molecules	Fatty Acyls	Eicosanoids	5.5265	5.4149	5.444	5.51	5.1335	5.9107	5.8806	5.9015	5.9358	5.903	6.1102	6.1161	6.06	6.1093	6.0634	6.2258	6.1418	6.2196	6.1386	6.1243	6.076	6.1038	6.3196	6.1705	6.1482	6.1966
pos_297	Farnesyl acetone	metab_296	-	-	280.263	pos	M+H, M+NH4, M+H-H2O	C18H30O	6.5827	0.0541808	84.7	-	-0.940472	-	-	-	-	-	-	-	-	-	-	8.0579	8.0639	7.983	8.0677	8.1167	8.0962	7.9252	8.1637	8.0896	8.0517	8.0611	7.975	8.1381	8.1082	8.1369	8.1099	8.1508	8.0597	8.1091	7.9953	8.0731	8.1395	8.1024	8.0969	8.1283	7.9624
pos_479	(R)-b-amino-isobutyric acid	metab_478	C01205	LMFA01100049	104.071	pos	M+H-H2O, M+H	C4H9NO2	0.5305	0.0362976	86.9	-	4.54851	-	-	-	map00240;map01100;map00280	Pyrimidine metabolism; Metabolic pathways; Valine, leucine and isoleucine degradation	Metabolism;Metabolism;Metabolism	Nucleotide metabolism;Global and overview maps;Amino acid metabolism	-	-	-	6.4387	6.4708	6.4914	6.4476	6.541	6.8841	6.8863	6.8328	6.856	6.8373	6.8395	6.8634	6.8696	6.8783	6.8608	6.8829	6.8676	6.8719	6.8779	6.8894	6.8498	6.8621	6.8604	6.8705	6.8383	6.8791
pos_484	Citrulline	metab_483	C00327	HMDB0000904	176.103	pos	M+H-H2O, M+H	C6H13N3O3	0.5371	0.0850133	56.8	-	-0.377711	372-75-8	Peptides	Amino acids	map01100;map00220;map00997;map01110;map01230	Metabolic pathways; Arginine biosynthesis; Biosynthesis of various secondary metabolites - part 3; Biosynthesis of secondary metabolites; Biosynthesis of amino acids	Metabolism;Metabolism;Metabolism;Metabolism;Metabolism	Global and overview maps;Amino acid metabolism;Biosynthesis of other secondary metabolites;Global and overview maps;Global and overview maps	Organic acids and derivatives	Carboxylic acids and derivatives	Amino acids, peptides, and analogues	4.4556	4.4866	4.6951	4.923	4.715	5.691	5.6803	5.7775	5.7047	5.7996	5.3555	5.7169	5.388	5.2686	5.5218	5.1679	5.1694	5.2056	5.1839	5.0941	5.1395	5.0559	5.1639	5.1753	5.221	5.0746
pos_530	2-Ethylacrylic acid	metab_529	-	HMDB0001862	101.06	pos	M+H-H2O, M+H	C5H8O2	0.5787	0.0306711	54.6	-	4.88028	3586-58-1	-	-	-	-	-	-	Lipids and lipid-like molecules	Fatty Acyls	Fatty acids and conjugates	5.0402	5.0124	5.0233	5.0549	5.0214	5.5588	6.0257	5.8821	5.8975	5.4844	6.3974	6.3099	6.3928	6.4575	6.3885	6.5952	6.5826	6.5702	6.5948	6.5761	6.7015	6.6924	6.7087	6.698	6.6865	6.7265
pos_569	1-(Malonylamino)cyclopropanecarboxylic acid	metab_568	-	HMDB0031700	170.045	pos	M+H-H2O, M+H	C7H9NO5	1.2474	0.0243381	54.4	-	0.322434	80550-27-2	-	-	-	-	-	-	Organic acids and derivatives	Carboxylic acids and derivatives	Amino acids, peptides, and analogues	5.6753	5.8738	5.8873	5.8615	5.7628	5.6175	5.6414	5.4871	5.6299	5.5972	5.6095	5.4689	5.5601	5.5203	5.461	5.4402	5.467	5.4511	5.4676	5.4512	5.2381	5.3071	5.287	5.3749	5.3767	5.3266
pos_572	Uracil	metab_571	C00106	HMDB0000300	113.035	pos	M+H, 2M+ACN+Na	C4H4N2O2	1.268	0.0323025	70.3	-	1.88209	66-22-8	Nucleic acids	Bases	map00240;map01100;map00770;map00410	Pyrimidine metabolism; Metabolic pathways; Pantothenate and CoA biosynthesis; beta-Alanine metabolism	Metabolism;Metabolism;Metabolism;Metabolism	Nucleotide metabolism;Global and overview maps;Metabolism of cofactors and vitamins;Metabolism of other amino acids	Organoheterocyclic compounds	Diazines	Pyrimidines and pyrimidine derivatives	5.8702	5.8619	5.8741	5.864	5.9638	5.9537	5.9126	5.9375	5.8633	5.9454	5.618	5.6875	5.6972	5.6122	5.6492	5.5859	5.6014	5.5749	5.5311	5.6373	5.5364	5.5344	5.6699	5.5215	5.5545	5.5165
pos_606	Hypoxanthine	metab_604	C00262	HMDB0000157	137.046	pos	M+H, M+Na	C5H4N4O	1.7271	0.0219334	79.8	-	-0.312041	68-94-0	-	-	map01100;map00230	Metabolic pathways; Purine metabolism	Metabolism;Metabolism	Global and overview maps;Nucleotide metabolism	Organoheterocyclic compounds	Imidazopyrimidines	Purines and purine derivatives	6.5958	6.6045	6.5733	6.5571	6.5899	7.3266	7.3117	7.3578	7.3085	7.3436	6.8322	7.0795	6.8403	6.804	6.9253	5.3638	5.5191	5.3588	5.2206	5.3577	5.4088	5.2025	5.1685	5.1449	5.1806	4.8638
pos_638	Phenylacetaldehyde	metab_636	C00601	HMDB0006236;HMDB0041610	121.065	pos	M+H, M+NH4	C8H8O	2.4342	0.0383438	84.6	-	1.13439	122-78-1	-	-	map01100;map00360;map01120;map00643	Metabolic pathways; Phenylalanine metabolism; Microbial metabolism in diverse environments; Styrene degradation	Metabolism;Metabolism;Metabolism;Metabolism	Global and overview maps;Amino acid metabolism;Global and overview maps;Xenobiotics biodegradation and metabolism	Benzenoids	Benzene and substituted derivatives	Phenylacetaldehydes	6.3548	6.3719	6.344	6.3491	6.2819	7.2152	7.238	7.2482	6.9891	7.1205	7.423	7.5298	7.4778	7.5352	7.5168	7.6543	7.6371	7.6403	7.6372	7.6328	7.6802	7.6974	7.7371	7.687	7.6677	7.4834
pos_647	(R)-Pantothenic acid 4'-O-b-D-glucoside	metab_645	-	HMDB0033965	404.152	pos	M+H, M+Na	C15H27NO10	2.5532	0.210045	-	67.7	0.627049	29493-59-2	-	-	-	-	-	-	Lipids and lipid-like molecules	Fatty Acyls	Fatty acyl glycosides	5.3914	5.3986	5.4305	5.4741	5.3626	3.1968	3.2049	3.1892	3.2102	3.2071	3.2814	3.2184	3.7222	3.2351	3.2201	3.2396	3.2317	3.234	3.2236	3.2304	3.2237	3.2316	3.2433	3.2255	3.232	3.2207
pos_653	Flumazenil acid	metab_651	-	-	276.075	pos	M+2H, M+H	C13H10FN3O3	2.6022	0.0385695	62.4	-	-9.08591	-	-	-	-	-	-	-	-	-	-	5.0708	5.353	5.2648	5.2207	5.1612	5.1747	5.2755	5.148	5.3015	5.2826	5.3662	5.2422	5.2553	5.3079	5.2876	5.2621	5.2426	5.2208	5.2931	5.2382	5.2544	5.2807	5.23	5.2774	5.262	5.282
pos_693	4-Hydroxyphenylpyruvic acid	metab_691	C01179	HMDB0000707	203.034	pos	M+H-H2O, M+Na	C9H8O4	3.2051	0.100457	-	50.4	-0.448824	156-39-8	-	-	map01100;map01110;map01210;map00130;map01055;map00998;map01230;map00950;map00350;map00261;map00400;map00401;map01063;map01060	Metabolic pathways; Biosynthesis of secondary metabolites; 2-Oxocarboxylic acid metabolism; Ubiquinone and other terpenoid-quinone biosynthesis; Biosynthesis of vancomycin group antibiotics; Biosynthesis of various secondary metabolites - part 2; Biosynthesis of amino acids; Isoquinoline alkaloid biosynthesis; Tyrosine metabolism; Monobactam biosynthesis; Phenylalanine, tyrosine and tryptophan bi…	Metabolism;Metabolism;Metabolism;Metabolism;Metabolism;Metabolism;Metabolism;Metabolism;Metabolism;Metabolism;Metabolism;Metabolism;Metabolism;Metabolism	Global and overview maps;Global and overview maps;Global and overview maps;Metabolism of cofactors and vitamins;Metabolism of terpenoids and polyketides;Biosynthesis of other secondary metabolites;Global and overview maps;Biosynthesis of other secondary metabolites;Amino acid metabolism;Biosynthesis of other secondary metabolites;Amino acid metabolism;Biosynthesis of other secondary metabolites;C…	Benzenoids	Benzene and substituted derivatives	Phenylpyruvic acid derivatives	5.1121	4.8901	5.2378	4.9705	4.7596	4.648	4.612	4.6699	4.6031	4.6069	4.6379	4.5679	4.6924	4.5763	4.6571	4.5532	4.5381	4.5604	4.5771	4.5024	4.4493	4.4612	4.4207	4.448	4.4465	4.5229
pos_729	1-(2H-1,3-benzodioxol-5-yl)-3-(6-hydroxy-4-methoxy-1-benzofuran-5-yl)propane-1,3-dione	metab_727	-	HMDB0129363	355.081	pos	M+H-H2O, M+H	C19H14O7	3.6823	0.0870665	-	54.1	-1.14104	-	-	-	-	-	-	-	Phenylpropanoids and polyketides	Linear 1,3-diarylpropanoids	Chalcones and dihydrochalcones	5.6142	5.5741	5.5325	5.6664	5.4043	5.2977	5.3081	5.4444	5.1471	5.3406	5.5198	5.4609	5.4826	5.4801	5.5247	5.3073	5.3213	5.3298	5.255	5.2968	5.1611	4.9422	5.0911	5.1563	4.9259	4.467
pos_768	4-Isopentylphenol	metab_766	C14697	-	203.081	pos	M+H, M+K	C11H16O	4.2219	0.066211	50.9	-	-0.284693	-	-	-	-	-	-	-	-	-	-	5.0897	5.2142	5.1055	5.2693	4.9871	5.4769	5.5558	5.5008	5.3929	5.4198	5.5152	5.5838	5.5819	5.6669	5.6233	5.6893	5.6717	5.6797	5.6688	5.6722	5.7592	5.9006	5.8596	5.8968	5.9284	5.9938
pos_776	M-Coumaric acid	metab_774	C12621	HMDB0001713;HMDB0125104	147.044	pos	M+H-H2O, M+H	C9H8O3	4.3829	0.0284778	57	-	-0.484087	14755-02-3	-	-	map01100;map01220;map00360;map01120	Metabolic pathways; Degradation of aromatic compounds; Phenylalanine metabolism; Microbial metabolism in diverse environments	Metabolism;Metabolism;Metabolism;Metabolism	Global and overview maps;Global and overview maps;Amino acid metabolism;Global and overview maps	Phenylpropanoids and polyketides	Cinnamic acids and derivatives	Hydroxycinnamic acids and derivatives	6.4127	6.4452	6.504	6.397	6.3353	5.9046	5.9921	6.033	5.8875	6.0783	6.0505	5.9708	6.0739	6.0537	6.0077	5.8116	5.8904	5.8369	5.8104	5.8765	5.5163	5.5239	5.6031	5.4732	5.794	5.2824
pos_780	N-Acetyl-L-phenylalanine	metab_778	C03519	HMDB0000512	208.097	pos	M+H, M+NH4	C11H13NO3	4.3129	0.0241155	77.4	-	-0.39514	2018-61-3	-	-	map01100;map00360	Metabolic pathways; Phenylalanine metabolism	Metabolism;Metabolism	Global and overview maps;Amino acid metabolism	Organic acids and derivatives	Carboxylic acids and derivatives	Amino acids, peptides, and analogues	3.7149	3.9623	3.8077	3.8436	3.9032	5.463	5.4718	5.2879	5.3875	5.4419	5.5436	5.5857	5.6159	5.5844	5.5892	5.584	5.5875	5.6008	5.5734	5.6066	5.6483	5.6474	5.7602	5.618	5.7212	5.7002
pos_781	Hydroxygaleon	metab_779	-	HMDB0031535	387.107	pos	M+H-H2O, M+2Na-H	C20H22O5	4.4249	0.0572209	-	66.1	-8.54654	61576-09-8	-	-	-	-	-	-	Organoheterocyclic compounds	Lactones	Gamma butyrolactones	5.6868	5.8706	5.778	5.8543	5.8824	4.728	4.7098	4.7677	4.7378	4.7835	4.7853	4.7158	4.7994	4.8377	4.6891	4.8091	4.8125	4.783	4.756	4.8115	4.6318	4.7293	4.8384	4.7299	4.7601	4.7751
pos_787	N-Acetyl-DL-tryptophan	metab_785	-	-	247.108	pos	M+H-H2O, M+H	C13H14N2O3	4.5306	0.0176969	96.6	-	-0.465453	-	-	-	-	-	-	-	-	-	-	5.3744	5.1555	5.0199	4.9981	4.746	5.3349	5.4673	5.4132	5.281	5.3735	5.6212	5.5581	5.6121	5.6485	5.6064	5.7424	5.726	5.6778	5.6983	5.7124	5.6887	5.6618	5.6653	5.627	5.5565	5.5822
pos_808	Wistin	metab_806	-	LMPK12050097;HMDB0030869	502.171	pos	M+H-H2O, M+ACN+H	C23H24O10	4.7699	0.0415863	-	53	-5.707	19046-26-5	-	-	-	-	-	-	Phenylpropanoids and polyketides	Isoflavonoids	Isoflavonoid O-glycosides	5.691	5.8783	5.9686	5.8166	5.9449	5.4566	5.6292	5.7945	5.3245	5.4572	5.6592	5.7484	5.7121	5.7481	5.6134	5.587	5.5704	5.6547	5.5473	5.6145	5.4241	5.4965	5.5969	5.3702	5.6022	5.0964
pos_818	Lumichrome	metab_816	C01727	-	243.087	pos	M+H, 2M+ACN+Na	C12H10N4O2	4.9456	0.0812718	64.3	-	-0.751812	-	-	-	map00740	Riboflavin metabolism	Metabolism	Metabolism of cofactors and vitamins	-	-	-	4.9329	4.902	4.974	4.9669	4.8001	5.1703	5.2441	5.3686	5.0456	5.0252	5.1833	5.2489	5.284	5.1751	5.3884	5.1136	5.2221	5.1009	5.0398	5.3785	5.2453	5.315	5.2651	5.1751	5.1968	5.4251
pos_820	12-hydroxyjasmonic acid	metab_818	C21669	LMFA02020011	191.107	pos	M+H-2H2O, M+H	C12H18O4	4.9876	0.0287734	59.3	-	-0.524921	-	-	-	-	-	-	-	-	-	-	5.8522	5.9281	5.8351	5.8232	5.7141	5.6817	5.7371	5.651	5.7997	5.7369	5.6795	5.7265	5.6764	5.6755	5.6902	5.6314	5.6289	5.6249	5.6066	5.6337	5.6058	5.6284	5.6327	5.5781	5.6094	5.5851
pos_827	3'-Hydroxy-4',5,6,7,8-pentamethoxyflavone	metab_825	-	HMDB0029545	389.123	pos	M+H, M+Na	C20H20O8	5.0506	0.0443101	-	62	-1.38599	112448-39-2	-	-	-	-	-	-	Phenylpropanoids and polyketides	Flavonoids	O-methylated flavonoids	4.6109	4.873	4.8133	4.8242	5.3238	5.6081	5.5468	5.6579	5.3919	5.4934	5.437	5.5741	5.5192	5.5394	5.4925	5.305	5.3522	5.424	5.3868	5.3696	5.0275	5.1194	5.2592	4.9491	5.2259	4.7533
pos_854	Tanacetin	metab_852	-	HMDB0035715	247.133	pos	M+H-H2O, M+H	C15H20O4	5.5407	0.0256981	-	74.9	-0.925987	1401-54-3	-	-	-	-	-	-	Lipids and lipid-like molecules	Prenol lipids	Terpene lactones	5.6195	5.5413	5.4784	5.0607	4.9399	5.114	5.3105	5.1008	5.7422	5.4279	5.3262	5.3327	5.4553	5.4537	5.3838	5.276	5.3891	5.2756	5.3521	5.4268	5.3833	5.5032	5.4655	5.2882	5.3692	5.2498
pos_857	Caryophyllene epoxide	metab_855	C16908	HMDB0036789	221.19	pos	M+H-H2O, M+H	C15H24O	5.6247	0.0512671	56.3	-	-0.285313	-	-	-	-	-	-	-	Lipids and lipid-like molecules	Prenol lipids	Sesquiterpenoids	5.2846	5.2997	5.2021	5.2287	5.0037	2.8196	3.522	3.3573	3.2289	4.0936	3.9381	3.7184	4.0649	3.8503	3.8151	3.9778	3.7627	3.658	3.8374	3.9819	4.0236	3.7384	3.9914	3.6992	4.068	3.7362
pos_889	Achillin	metab_887	C09287	-	247.133	pos	M+H-H2O, M+H	C15H18O3	6.0727	0.030736	72.8	-	-0.2053	-	-	-	-	-	-	-	-	-	-	6.8015	6.2603	6.4568	5.4494	5.51	5.4658	5.5109	5.3335	6.3981	5.4431	5.2598	5.2705	5.5991	5.3177	5.3427	5.2402	5.2981	5.2502	5.2696	5.3701	5.2209	6.1938	5.2634	5.1687	5.1664	5.2295
pos_903	(Z,Z)-3,6-Dodecadien-1-ol	metab_901	-	HMDB0031102;LMFA05000573	205.159	pos	M+H, M+Na	C12H22O	6.2054	0.0265815	-	51	-0.14306	29125-78-8	-	-	-	-	-	-	Lipids and lipid-like molecules	Fatty Acyls	Fatty alcohols	5.0416	5.5892	5.157	5.0025	5.0564	5.1781	5.2052	5.1279	5.327	5.2332	5.2171	5.1689	5.222	5.1502	5.2603	5.1659	5.1596	5.1525	5.1719	5.1096	5.2013	5.184	5.1994	5.1784	5.158	5.1745
pos_923	3-ketosphingosine	metab_921	C06121	LMSP01010002	298.274	pos	M+H-2H2O, M+H	C18H35NO2	6.3029	0.0459437	79.8	-	-0.957962	-	-	-	-	-	-	-	-	-	-	5.763	5.7916	5.8511	5.8016	5.9806	6.5424	6.7004	6.5144	6.5336	6.4564	6.5099	6.4558	6.5358	6.5905	6.4176	6.7166	6.5628	6.6923	6.6841	6.5651	6.6675	6.7167	6.8769	6.7411	6.7787	6.8028
pos_987	8-Heptadecenal	metab_985	-	HMDB0041335;LMFA06000259	270.279	pos	M+NH4, 2M+K	C17H32O	6.7011	0.140554	-	53.8	-1.29169	56797-41-2	-	-	-	-	-	-	Lipids and lipid-like molecules	Fatty Acyls	Fatty aldehydes	5.3453	5.2746	5.128	5.2813	5.3984	5.171	5.1171	5.1851	5.1115	5.1216	5.0126	5.1468	5.2069	5.1058	5.9121	5.6616	5.2349	5.2478	5.1402	5.3691	5.3426	5.1983	5.1612	4.944	5.3291	5.1255
pos_1062	DG(18:0/16:1(9Z)/0:0)	metab_1060	-	HMDB0007157	617.512	pos	M+NH4, M+Na	C37H70O5	7.5762	0.1572	-	57	-0.640149	-	-	-	-	-	-	-	Lipids and lipid-like molecules	Glycerolipids	Diradylglycerols	6.5755	6.4464	6.5569	6.4075	6.6058	6.5282	6.6213	6.6029	6.5121	6.5796	6.5303	6.6756	6.5389	6.6194	6.597	6.5346	6.6401	6.5295	6.668	6.5556	6.5851	6.6108	6.4955	6.6544	6.483	6.6649
pos_1065	GPCho(18:2/18:2)	metab_1063	-	HMDB0013435;HMDB0011301;HMDB0011277;HMDB0008138;HMDB0011310	782.569	pos	M+H, M+Na	C44H80NO8P	7.6112	0.0868217	50.7	-	-0.526327	-	-	-	-	-	-	-	Lipids and lipid-like molecules	Glycerophospholipids	Glycerophosphocholines	6.5444	7.0282	7.2781	7.0147	6.8315	6.6541	6.4538	6.3663	6.7939	7.2399	6.6497	5.9392	7.0338	6.7255	6.4387	6.0066	6.5956	6.2659	6.388	6.6454	6.2805	6.4188	6.456	6.1566	7.1824	6.4297
pos_1187	Lithocholic acid glycine conjugate	metab_1185	C15557	LMST05030009;HMDB0000698	398.305	pos	M+H-2H2O, M+CH3OH+H	C26H43NO4	6.9808	0.0723938	-	54.9	-1.28481	474-74-8	-	-	-	-	-	-	Lipids and lipid-like molecules	Steroids and steroid derivatives	Bile acids, alcohols and derivatives	5.028	4.8313	4.911	4.9244	4.9047	6.4612	6.3756	6.4103	6.4424	6.368	6.9639	6.9476	6.8699	6.8672	6.8885	6.9573	7.0739	7.0902	7.0328	6.9952	6.9594	7.1372	7.1107	7.1366	7.0085	6.6808
pos_1230	20-Hydroxy-PGF2a	metab_1228	-	HMDB0004049	335.219	pos	M+Na, M+H-2H2O	C20H34O6	6.8269	0.0739222	-	57.6	-0.873326	-	-	-	-	-	-	-	Lipids and lipid-like molecules	Fatty Acyls	Eicosanoids	6.4288	6.4527	6.4339	6.6508	6.5433	7.0747	7.0396	7.0747	7.0074	7.0596	6.9596	6.9811	6.9868	6.9219	6.8796	7.0436	7.0065	7.0688	7.0004	7.02	7.0188	7.1547	7.1891	7.0663	7.1364	7.1144
pos_1235	DGDG(18:3/18:3)	metab_1233	-	-	954.614	pos	M+NH4, M+Na	C51H84O15	6.8129	0.0574761	90.1	-	-0.636469	-	-	-	-	-	-	-	-	-	-	7.3557	7.2019	7.1359	7.2989	7.1759	6.3626	5.7168	5.5754	5.6678	5.7477	5.3391	5.4545	5.336	4.9268	5.3472	4.3938	4.3859	4.3882	5.0048	4.3846	4.3779	4.3857	4.3975	4.3796	4.7192	4.4884
pos_1251	Humulol	metab_1249	-	HMDB0038213	240.232	pos	M+H-H2O, M+NH4	C15H26O	6.6527	0.104822	-	74	-0.32296	24405-58-1	-	-	-	-	-	-	Lipids and lipid-like molecules	Prenol lipids	Sesquiterpenoids	5.8514	5.8954	5.8171	5.8964	5.891	5.8624	5.7375	5.9181	5.8752	5.8194	5.8006	5.7591	5.8626	5.8477	5.9263	5.8935	5.8871	5.8578	5.8438	5.7272	5.8799	5.903	5.8735	5.8329	5.8685	5.7088
pos_1296	9-HOTE	metab_1294	-	HMDB0010224	259.205	pos	M+H-2H2O, M+NH4	C18H30O3	6.5827	0.0565829	-	70	-0.709326	-	-	-	-	-	-	-	Lipids and lipid-like molecules	Fatty Acyls	Lineolic acids and derivatives	5.4041	5.5213	5.3491	5.4591	5.0872	5.6312	5.6524	5.5649	5.7582	5.6666	5.7376	5.7379	5.6686	5.6336	5.6795	5.756	5.7164	5.7677	5.7337	5.7123	5.8482	5.8178	5.912	5.8619	5.8435	5.841
pos_1315	1-Linoleoylglycerophosphocholine	metab_1313	C04100	HMDB0010386	520.34	pos	M+H, M+Na	C26H50NO7P	6.4777	0.0532208	65.6	-	-0.182482	-	-	-	-	-	-	-	Lipids and lipid-like molecules	Glycerophospholipids	Glycerophosphocholines	6.5617	6.8819	7.2589	6.7922	6.598	6.317	6.3725	6.2417	6.4256	6.8926	6.5228	5.9352	6.8646	6.5451	6.1886	6.2207	6.5228	6.3787	6.3359	6.5839	6.069	6.347	6.2595	6.3594	7.0792	5.8837
pos_1332	6-[5]-ladderane-1-hexanol	metab_1330	-	LMFA05000063	261.221	pos	M+H-H2O, M+H	C18H28O	6.4357	0.0105801	55.7	-	-0.424063	-	-	-	-	-	-	-	-	-	-	6.7573	6.6347	6.6712	6.7261	6.5472	6.2727	6.1575	6.2264	6.23	6.2348	6.2915	6.2522	6.3198	6.3088	6.3312	6.3368	6.3254	6.3224	6.3556	6.314	6.2797	6.3842	6.4127	6.335	6.3732	6.3284
pos_1363	9-OxoODE	metab_1361	C14766	HMDB0004669;LMFA02000274;LMFA02000251	295.226	pos	M+H-2H2O, M+H	C18H30O3	6.2961	0.0233303	64.7	-	-0.831195	-	-	-	map00591	Linoleic acid metabolism	Metabolism	Lipid metabolism	Lipids and lipid-like molecules	Fatty Acyls	Lineolic acids and derivatives	7.0269	7.0321	7.0363	7.134	7.1076	7.2696	7.2933	7.2874	7.2833	7.3011	7.2077	7.1907	7.2099	7.2119	7.1589	7.2896	7.2342	7.2588	7.2681	7.2215	7.2592	7.3453	7.3751	7.2879	7.3254	7.4122
pos_1432	3,8-Dihydroxy-6-methoxy-7(11)-eremophilen-12,8-olide	metab_1430	-	HMDB0041551	297.167	pos	M+H, M+Na	C16H24O5	6.0587	0.0327379	60.9	-	-7.68226	-	-	-	-	-	-	-	Lipids and lipid-like molecules	Prenol lipids	Terpene lactones	5.6414	5.5353	5.5429	5.6689	5.4863	5.2479	5.2248	5.2223	5.3213	5.2251	5.29	5.3072	5.2307	5.2844	5.2909	5.2623	5.2836	5.2711	5.2761	5.1721	5.2036	5.1413	5.2132	5.1422	5.1879	5.2743
pos_1449	(+/-)-trans-and cis-4,8-Dimethyl-3,7-nonadien-2-ol	metab_1447	-	-	191.143	pos	M+H-H2O, M+Na	C11H20O	5.9677	0.0250854	-	56.5	-0.478651	-	-	-	-	-	-	-	-	-	-	6.24	6.3758	6.3006	6.3777	6.1577	6.6344	6.6993	6.732	6.6979	6.7076	6.8013	6.735	6.7947	6.7733	6.7537	6.7197	6.7248	6.7363	6.7142	6.7502	6.5092	6.5767	6.6667	6.5605	6.5709	6.4501
pos_1454	4,4alpha,5,6-Tetrahydro-7-methyl-2(3H)-naphthalenone	metab_1452	-	HMDB0039803	163.112	pos	M+H, 2M+K	C11H14O	5.8907	0.0328443	59.8	-	-0.627113	34545-88-5	-	-	-	-	-	-	Organic oxygen compounds	Organooxygen compounds	Carbonyl compounds	6.2368	6.3184	6.2269	6.2942	6.1487	6.2881	6.3374	6.2645	6.3491	6.3021	6.3528	6.3628	6.3188	6.3354	6.3283	6.3285	6.3424	6.3556	6.3303	6.3216	6.3129	6.3289	6.3681	6.334	6.3271	6.2672
pos_1464	2-(3,4-dihydroxyphenyl)-7-{[3,4,5-trihydroxy-6-(hydroxymethyl)oxan-2-yl]oxy}-4H-chromen-4-one	metab_1462	-	HMDB0141940	455.095	pos	M+H-H2O, M+Na	C21H20O10	5.5757	0.0533432	-	70.4	-0.86023	-	-	-	-	-	-	-	Phenylpropanoids and polyketides	Flavonoids	Flavonoid glycosides	6.0887	5.9498	6.4012	6.0993	5.6473	5.8382	5.7486	6.3663	5.774	5.7612	6.1289	5.9598	6.1282	5.9649	6.0208	5.7617	5.6739	5.9537	5.8553	5.646	5.8575	5.3169	5.8122	5.3901	5.4438	5.1582
pos_1510	Trans-3-Hydroxycotinine glucuronide	metab_1508	-	HMDB0001204	369.133	pos	M+H-H2O, M+H	C16H20N2O8	4.1379	0.0238875	-	75.7	9.58454	132929-88-5	-	-	-	-	-	-	Organic oxygen compounds	Organooxygen compounds	Carbohydrates and carbohydrate conjugates	5.1074	6.17	6.63	5.6033	5.8972	5.7883	5.8399	5.6735	6.2045	6.2978	6.0875	4.9367	6.3264	6.225	5.7106	5.8015	6.0553	5.9378	6.1688	6.2806	5.357	5.6106	5.5999	5.5028	6.4319	5.126
pos_1540	N-Acetyltyramine	metab_1538	-	-	180.102	pos	M+H, M+Na	C10H13NO2	3.2541	0.0204421	87.6	-	-0.478485	-	-	-	-	-	-	-	-	-	-	4.7156	4.6891	4.5465	4.48	4.4317	6.3019	6.2565	6.3016	5.9068	6.0184	6.4396	6.6887	6.5991	6.6437	6.6246	6.9255	6.9358	6.9165	6.9352	6.8813	6.9595	6.9727	7.0385	6.9886	6.9494	6.6778
pos_1541	1-(2-Furyl)butan-3-one	metab_1539	-	HMDB0032290	103.055	pos	M+H-2H2O, 2M+K	C8H10O2	3.2401	0.029101	-	50.1	2.26108	699-17-2	-	-	-	-	-	-	Organoheterocyclic compounds	Heteroaromatic compounds	Not Available	5.55	5.6055	5.5852	5.5842	5.5834	6.0373	6.0081	5.8821	5.9673	6.0459	5.6703	6.0285	5.7682	5.6341	5.781	5.5264	5.58	5.5495	5.5221	5.5839	5.5595	5.5111	5.579	5.5193	5.7074	5.2729
pos_1584	S-Adenosylhomocysteine	metab_1582	C00021	HMDB0000939	385.128	pos	M+2H, M+H	C14H20N6O5S	1.5591	0.022464	78.1	-	-0.0872774	979-92-0	-	-	map01100;map00270;map01230	Metabolic pathways; Cysteine and methionine metabolism; Biosynthesis of amino acids	Metabolism;Metabolism;Metabolism	Global and overview maps;Amino acid metabolism;Global and overview maps	Nucleosides, nucleotides, and analogues	5'-deoxyribonucleosides	5'-deoxy-5'-thionucleosides	4.295	4.0633	4.2739	4.1326	3.3506	4.4784	4.9569	3.4181	3.4546	4.5796	4.7381	3.4473	5.2878	5.1353	4.5295	5.2001	5.3353	5.0355	5.1589	5.4852	4.5767	4.6771	4.6665	4.3603	5.4268	3.9657
pos_1856	1-Kestose	metab_1854	C03661	HMDB0011729	527.158	pos	M+NH4, M+Na	C18H32O16	0.9684	0.0983943	81.5	-	-0.710658	470-69-9	-	-	-	-	-	-	Organic oxygen compounds	Organooxygen compounds	Carbohydrates and carbohydrate conjugates	6.6279	6.7131	6.77	6.6609	6.5519	5.5283	5.466	5.7622	6.1575	6.3606	6.0923	5.2892	6.3407	6.0387	5.8961	5.5708	6.0023	5.6391	5.953	5.9459	4.5636	4.847	5.0496	4.3064	5.6846	4.2172
pos_1942	Cyclohex-2-enone	metab_1940	C02395	-	97.0652	pos	M+H	C6H8O	0.33	0.0460229	71.3	-	3.75286	-	-	-	-	-	-	-	-	-	-	6.6262	6.5978	6.5941	6.5833	6.6271	6.6378	6.6183	6.6369	6.6128	6.6028	6.6258	6.6187	6.6289	6.6162	6.6435	6.637	6.6203	6.6166	6.6202	6.6287	6.6266	6.6357	6.5904	6.627	6.6162	6.6345
pos_2034	L-Carnitine	metab_2032	C00318	HMDB0000062	162.112	pos	M+H	C7H15NO3	0.5238	0.0189624	65.3	-	-0.753449	541-15-1	-	-	map04976;map04714	Bile secretion; Thermogenesis	Organismal Systems;Organismal Systems	Digestive system;Environmental adaptation	Organic nitrogen compounds	Organonitrogen compounds	Quaternary ammonium salts	6.0577	6.2773	6.219	6.2093	6.0239	5.7822	5.7753	6.0673	5.7685	5.7223	5.6635	5.7752	5.7014	5.7746	5.841	5.8084	5.7632	5.7268	5.7283	5.7198	5.8408	5.767	5.8733	5.7766	5.6643	5.7712
pos_2060	Aniline	metab_2058	C00292	HMDB0003012	94.0655	pos	M+H	C6H7N	0.5577	0.094135	51.6	-	4.09356	62-53-3	-	-	map00627;map01120	Aminobenzoate degradation; Microbial metabolism in diverse environments	Metabolism;Metabolism	Xenobiotics biodegradation and metabolism;Global and overview maps	Benzenoids	Benzene and substituted derivatives	Aniline and substituted anilines	4.8704	4.7979	4.8129	4.7338	4.901	4.784	4.8036	4.7472	4.7588	4.7101	4.7751	4.8178	4.7949	4.7836	4.887	4.9797	4.8528	4.8181	4.8292	4.9446	4.8697	4.8744	4.8578	4.8562	4.8603	4.8762
pos_2083	Guanosine monophosphate	metab_2081	C00144	HMDB0001397	427.076	pos	M+ACN+Na	C10H14N5O8P	0.5717	0.05282	-	58.5	5.1793	85-32-5	Nucleic acids	Nucleotides	map01100;map00230;map04022;map04740;map01523;map01065;map04742;map04744;map01060	Metabolic pathways; Purine metabolism; cGMP-PKG signaling pathway; Olfactory transduction; Antifolate resistance; Biosynthesis of alkaloids derived from histidine and purine; Taste transduction; Phototransduction; Biosynthesis of plant secondary metabolites	Metabolism;Metabolism;Environmental Information Processing;Organismal Systems;Human Diseases;Metabolism;Organismal Systems;Organismal Systems;Metabolism	Global and overview maps;Nucleotide metabolism;Signal transduction;Sensory system;Drug resistance: antineoplastic;Chemical structure transformation maps;Sensory system;Sensory system;Chemical structure transformation maps	Nucleosides, nucleotides, and analogues	Purine nucleotides	Purine ribonucleotides	6.2678	6.1771	6.1443	6.1628	6.3535	6.3562	6.1901	6.7687	6.8047	7.0416	6.3077	5.4509	6.7806	6.5067	6.4072	5.6448	6.1761	5.7703	6.019	6.0039	5.0018	5.2815	5.1886	5.0105	5.6935	4.4078
pos_2089	N-Acetylputrescine	metab_2087	C02714	HMDB0002064	131.118	pos	M+H	C6H14N2O	0.5787	0.0461904	75	-	0.2168	18233-70-0	-	-	map01100;map00330	Metabolic pathways; Arginine and proline metabolism	Metabolism;Metabolism	Global and overview maps;Amino acid metabolism	Organic acids and derivatives	Carboximidic acids and derivatives	Carboximidic acids	4.1337	4.3403	4.5081	4.5842	4.4066	5.7483	5.8333	5.7027	5.8307	5.7366	5.7849	5.8459	5.7933	5.8483	5.8296	5.9637	5.9382	5.9514	5.9765	5.9259	6.0411	6.0444	6.0763	6.0601	6.0489	6.003
pos_2090	Octopamine (p-Hydroxyphenylethanolamine)	metab_2088	-	-	154.086	pos	M+H	C8H11NO2	0.5787	0.169073	64.5	-	-0.38353	-	-	-	-	-	-	-	-	-	-	3.3289	3.3705	3.3609	3.3326	3.3346	4.2203	3.7831	3.7653	3.4231	3.4975	4.4199	4.8086	4.5688	4.6808	4.8923	4.9063	4.9601	4.9366	4.9903	4.8786	4.8187	5.1447	5.2616	5.2297	5.1815	4.8265
pos_2100	Adenine	metab_2098	C00147	HMDB0000034	136.062	pos	M+H	C5H5N5	0.5856	0.188368	92.5	-	0.126281	73-24-5	Nucleic acids	Bases	map01100;map00230;map00908	Metabolic pathways; Purine metabolism; Zeatin biosynthesis	Metabolism;Metabolism;Metabolism	Global and overview maps;Nucleotide metabolism;Metabolism of terpenoids and polyketides	Organoheterocyclic compounds	Imidazopyrimidines	Purines and purine derivatives	6.4487	6.4557	6.5227	6.4627	6.5035	4.1997	3.8932	4.5367	4.0383	4.0406	3.9992	4.0552	3.7418	3.1482	4.1703	3.5362	3.5202	4.0844	3.8706	3.9297	3.591	3.8862	3.4604	3.6193	3.1313	3.2626
pos_2220	5-Aminopentanal	metab_2218	C12455	HMDB0012815	134.118	pos	M+CH3OH+H	C5H11NO	0.7733	0.162337	-	68	-0.0410573	-	-	-	map01100;map00960;map00310;map01110;map01120	Metabolic pathways; Tropane, piperidine and pyridine alkaloid biosynthesis; Lysine degradation; Biosynthesis of secondary metabolites; Microbial metabolism in diverse environments	Metabolism;Metabolism;Metabolism;Metabolism;Metabolism	Global and overview maps;Biosynthesis of other secondary metabolites;Amino acid metabolism;Global and overview maps;Global and overview maps	Organic oxygen compounds	Organooxygen compounds	Carbonyl compounds	4.9769	5.0846	5.1313	5.084	4.9001	4.6236	4.5759	4.5284	4.6057	4.4677	4.4826	4.4012	4.4599	4.4101	4.5766	4.2626	4.4129	4.3411	4.2578	4.2665	4.6182	4.5516	4.6294	4.5566	4.4767	4.3849
pos_2301	N-Acetylcadaverine	metab_2299	-	HMDB0002284	145.133	pos	M+H	C7H16N2O	0.864	0.0319963	54.8	-	-0.365803	32343-73-0	-	-	-	-	-	-	Organic acids and derivatives	Carboxylic acids and derivatives	Carboxylic acid derivatives	5.445	5.4866	5.477	5.4486	5.4507	5.6035	5.7129	5.5182	5.6508	5.5936	5.6164	5.73	5.7104	5.7534	5.762	6.041	6.0043	6.0077	6.0056	5.9945	6.1174	6.1985	6.2217	6.1911	6.1822	6.2227
pos_2362	Physalin B	metab_2360	-	HMDB0030128	475.177	pos	M+H-2H2O	C28H30O9	0.9479	0.0814696	-	54.4	3.40671	23133-56-4	-	-	-	-	-	-	Lipids and lipid-like molecules	Steroids and steroid derivatives	Physalins and derivatives	6.0929	6.1653	6.1357	6.0574	6.6867	3.8471	3.8552	3.8395	3.8604	3.8574	3.8891	3.8687	3.8871	3.8854	3.8704	3.8899	3.882	3.8843	3.8739	3.8807	3.874	3.8818	3.8936	3.8758	3.8823	3.871
pos_2409	D-Pipecolic acid	metab_2407	-	HMDB0005960	130.086	pos	M+H	C6H11NO2	1.0515	0.0227243	60.2	-	0.328872	1723-00-8	-	-	-	-	-	-	Organic acids and derivatives	Carboxylic acids and derivatives	Amino acids, peptides, and analogues	6.7214	6.8151	6.8349	6.792	6.8145	6.8018	6.7805	6.653	6.7756	6.7223	6.7365	6.7227	6.7205	6.7477	6.6958	6.7449	6.724	6.7235	6.731	6.7307	6.7642	6.7655	6.7838	6.7632	6.7603	6.7595
pos_2472	2,3-Butanediol	metab_2469	C00265	HMDB0003156	73.0653	pos	M+H-H2O	C4H10O2	1.1706	0.0397559	61.6	-	5.79453	513-85-9	-	-	-	-	-	-	Organic oxygen compounds	Organooxygen compounds	Alcohols and polyols	4.1187	4.1639	4.148	4.1081	4.275	4.6481	4.5533	4.5184	4.5061	4.431	4.6342	4.7024	4.6642	4.7206	4.6813	4.7039	4.6858	4.6778	4.6708	4.6846	4.8178	4.7466	4.7826	4.7131	4.73	4.8351
pos_2477	Hypoglycin B	metab_2474	C08280	HMDB0029428	303.155	pos	M+CH3OH+H	C12H18N2O5	1.1706	0.0445128	-	67.7	-1.32206	502-37-4	-	-	-	-	-	-	Organic acids and derivatives	Carboxylic acids and derivatives	Amino acids, peptides, and analogues	7.1736	7.1606	7.1082	7.1429	7.1053	6.4999	6.5891	6.625	6.4431	6.5805	6.5601	6.3872	6.4841	6.5797	6.3905	6.5046	6.4776	6.3952	6.5214	6.4735	6.2856	5.8689	5.8708	5.9347	5.7455	5.6276
pos_2501	Asparaginyl-Proline	metab_2498	-	HMDB0028739	271.14	pos	M+ACN+H	C9H15N3O4	1.268	0.028417	-	79	-1.52641	-	-	-	-	-	-	-	Organic acids and derivatives	Carboxylic acids and derivatives	Amino acids, peptides, and analogues	1.1534	1.1922	1.1832	1.1568	1.1587	5.2868	5.391	5.1304	5.3135	5.2767	5.475	5.4673	5.4484	5.4593	5.4194	5.5445	5.5401	5.4755	5.493	5.5493	5.4454	5.4464	5.4725	5.3977	5.4191	5.3577
pos_2582	Galactosylglycerol	metab_2579	C05401	HMDB0006790	318.118	pos	M+ACN+Na	C9H18O8	1.5731	0.0574626	-	57.6	8.2722	-	-	-	map00561;map00052	Glycerolipid metabolism; Galactose metabolism	Metabolism;Metabolism	Lipid metabolism;Carbohydrate metabolism	Lipids and lipid-like molecules	Glycerolipids	Glycosylglycerols	4.6059	4.294	4.112	4.1978	4.7746	4.6424	4.9515	4.8499	4.5116	4.823	4.9921	4.7408	5.0267	4.9799	5.0425	5.2839	5.2287	5.111	5.2817	5.1601	5.2172	4.9627	4.9319	4.9791	4.7468	4.6326
pos_2605	Dehydro-D-arabinono-1,4-lactone	metab_2602	C06316	-	147.029	pos	M+H	C5H6O5	1.6291	0.142401	79.7	-	-0.306075	-	-	-	-	-	-	-	-	-	-	5.2907	5.2755	5.3036	5.2431	5.3688	4.2461	4.2542	4.2384	4.2594	4.2563	4.2881	4.2677	4.2861	4.2844	4.2693	4.2888	4.281	4.2833	4.2729	4.2797	4.273	4.2808	4.2925	4.2747	4.2813	4.27
pos_2622	(R)-(+)-2-Pyrrolidone-5-carboxylic acid	metab_2619	-	-	130.05	pos	M+H	C5H7NO3	1.6851	0.00638995	72.2	-	0.399053	-	-	-	-	-	-	-	-	-	-	5.8339	5.9346	5.8917	5.8927	5.9561	6.4958	6.5329	6.4197	6.4878	6.4704	6.6075	6.5637	6.6092	6.6307	6.5864	6.6808	6.6721	6.6868	6.6606	6.6942	6.304	6.4885	6.6351	6.4701	6.4568	6.0721
pos_2633	2-Keto-6-acetamidocaproate	metab_2630	C05548	HMDB0012150	188.092	pos	M+H	C8H13NO4	1.7832	0.0102275	69.2	-	-0.451028	-	-	-	map01100;map00310	Metabolic pathways; Lysine degradation	Metabolism;Metabolism	Global and overview maps;Amino acid metabolism	Organic acids and derivatives	Keto acids and derivatives	Medium-chain keto acids and derivatives	6.0582	6.1647	6.1224	6.1467	6.0743	5.836	5.882	5.7652	5.8712	5.8384	5.8851	5.8247	5.8645	5.8784	5.8298	5.8746	5.8633	5.8546	5.8467	5.8482	5.8257	5.8081	5.8507	5.8286	5.8299	5.7839
pos_2637	Pyridoxine (Vitamin B6)	metab_2634	-	-	170.081	pos	M+H	C8H11NO3	1.8181	0.0358692	83.7	-	-0.483609	-	-	-	-	-	-	-	-	-	-	5.0237	5.0727	5.0547	4.971	5.1182	5.4304	5.6772	5.7205	5.4132	5.6856	5.5952	5.3086	5.5279	5.5593	5.387	5.435	5.3427	5.2427	5.422	5.3605	5.1335	4.9544	4.9692	4.9775	4.9689	4.9537
pos_2648	N-Acetyl-L-glutamic acid	metab_2645	C00624	HMDB0001138	190.071	pos	M+H	C7H11NO5	1.9372	0.02205	75	-	-0.645196	1188-37-0	-	-	map01100;map01210;map00220;map01110;map01230	Metabolic pathways; 2-Oxocarboxylic acid metabolism; Arginine biosynthesis; Biosynthesis of secondary metabolites; Biosynthesis of amino acids	Metabolism;Metabolism;Metabolism;Metabolism;Metabolism	Global and overview maps;Global and overview maps;Amino acid metabolism;Global and overview maps;Global and overview maps	Organic acids and derivatives	Carboxylic acids and derivatives	Amino acids, peptides, and analogues	4.8217	4.8782	4.862	4.8945	4.9001	5.1321	5.2198	5.0765	5.1506	5.142	5.3337	5.2566	5.3294	5.3262	5.3018	5.5316	5.5225	5.5226	5.5087	5.5275	5.3474	5.4512	5.5203	5.4034	5.4516	5.2352
pos_2692	2-Hydroxyphenethylamine	metab_2689	C02735	HMDB0001065	120.081	pos	M+H-H2O	C8H11NO	2.1962	0.0140244	-	57.6	1.06753	7568-93-6	-	-	-	-	-	-	Organic nitrogen compounds	Organonitrogen compounds	Amines	6.7125	6.7095	6.6961	6.7085	6.717	7.236	7.1695	7.0775	7.1271	7.2506	6.7611	7.1344	6.8843	6.6624	6.8941	6.3646	6.5014	6.41	6.3512	6.5073	6.4121	6.3648	6.4152	6.3447	6.693	6.1414
pos_2719	N2-(D-1-Carboxyethyl)-L-lysine	metab_2716	C04020	-	219.134	pos	M+H	C9H18N2O4	2.4202	0.0505177	72	-	-1.32713	-	-	-	map00310	Lysine degradation	Metabolism	Amino acid metabolism	-	-	-	5.6064	5.5872	5.5697	5.5996	5.5687	4.424	4.3764	4.1415	4.4017	4.4136	4.51	4.4458	4.6264	4.5414	4.363	4.5584	4.6981	4.59	4.6369	4.6957	4.4978	4.6312	4.4755	4.6618	4.7744	4.5633
pos_2726	1-(1,2,3,4,5-Pentahydroxypent-1-yl)-1,2,3,4-tetrahydro-beta-carboline-3-carboxylate	metab_2723	-	HMDB0029992;HMDB0012492	367.15	pos	M+H	C17H22N2O7	2.4342	0.0510189	-	53.5	-1.12038	-	-	-	-	-	-	-	Alkaloids and derivatives	Harmala alkaloids	Not Available	5.7446	5.6815	5.6978	5.6884	5.7467	5.8242	5.7765	5.7182	5.7683	5.7288	5.7399	5.7647	5.7121	5.7161	5.7171	5.5351	5.5194	5.6214	5.4807	5.5161	5.1979	5.2584	5.4407	4.7055	5.0856	3.9587
pos_2731	Peganine	metab_2728	C10733	;MJDBOTE0001206	189.102	pos	M+H	C11H12N2O	2.4552	0.0468995	82.2	-	-0.925275	-	-	-	map01063	Biosynthesis of alkaloids derived from shikimate pathway	Metabolism	Chemical structure transformation maps	-	-	-	3.558	4.5613	4.8077	3.9993	4.1822	3.7906	4.1033	4.7615	4.0635	3.9489	4.1618	4.1496	4.9935	4.8522	5.1681	4.868	5.0609	4.9393	5.2383	5.1061	5.0197	5.0787	4.8539	5.0153	6.1109	5.3414
pos_2766	Succinoadenosine	metab_2763	-	HMDB0000912	384.115	pos	M+H	C14H17N5O8	2.5602	0.0740204	56.1	-	-1.02004	-	-	-	-	-	-	-	Nucleosides, nucleotides, and analogues	Purine nucleosides	Not Available	5.85	5.9419	5.9585	5.9583	5.9056	3.2984	4.1345	4.7988	4.2748	4.0736	3.1312	3.1108	4.3334	3.6184	3.3626	3.9965	3.9159	3.1264	3.8026	4.4423	3.1161	3.124	3.1357	3.1179	4.3328	3.1131
pos_2810	Nigellicine	metab_2807	-	HMDB0030269	247.108	pos	M+H	C13H14N2O3	2.7772	0.0534786	58.4	-	-0.763397	98063-20-8	-	-	-	-	-	-	Organoheterocyclic compounds	Benzopyrazoles	Indazoles	4.0653	4.2646	4.2314	4.0372	3.894	3.4739	4.1416	3.5227	4.0676	4.1973	4.2638	3.8291	4.4305	4.0563	4.0088	4.3479	4.0536	4.1893	4.1795	4.3666	5.7679	6.0022	5.9827	6.2329	6.1118	6.163
pos_2812	3-Methylindole	metab_2809	C08313	HMDB0000466	132.081	pos	M+H	C9H9N	2.7842	0.0390968	52	-	0.277549	83-34-1	-	-	map00380	Tryptophan metabolism	Metabolism	Amino acid metabolism	Organoheterocyclic compounds	Indoles and derivatives	Indoles	5.0303	5.1154	5.1096	5.0657	5.0097	5.2132	5.2513	5.2461	5.1202	5.293	5.3971	5.3512	5.4202	5.4455	5.3638	5.4859	5.4818	5.4819	5.4705	5.494	5.3638	5.3589	5.3945	5.1045	5.3793	5.2613
pos_2817	Grevilline A	metab_2814	-	HMDB0029535	289.049	pos	M+H-2H2O	C18H12O6	2.7842	0.0930895	-	66.7	-1.17153	41744-32-5	-	-	-	-	-	-	Organoheterocyclic compounds	Pyrans	Pyranones and derivatives	4.716	4.8419	4.7206	4.7627	4.6438	5.1746	5.0838	5.1856	4.9636	5.0344	5.3074	5.1466	5.3534	5.207	5.3025	5.3296	5.2246	5.3724	5.1692	5.386	5.0811	5.1841	5.1524	4.5158	5.1098	4.7909
pos_2819	1,8-Diazacyclotetradecane-2,9-dione	metab_2816	C04277	HMDB0033567	227.175	pos	M+H	C12H22N2O2	2.7912	0.109266	69.9	-	-0.521819	-	-	-	map00930;map01120	Caprolactam degradation; Microbial metabolism in diverse environments	Metabolism;Metabolism	Xenobiotics biodegradation and metabolism;Global and overview maps	Hydrocarbons	Saturated hydrocarbons	Cycloalkanes	4.4034	3.7259	5.223	4.6623	6.3834	3.3348	3.5317	3.1464	3.3352	2.9386	2.9703	3.3021	3.4817	3.0374	3.4605	2.9711	3.3069	3.4137	3.47	2.9619	3.2254	3.0464	3.319	3.5331	3.3731	3.7089
pos_2832	N-Acetyl-DL-methionine	metab_2829	-	-	192.069	pos	M+H	C7H13NO3S	2.8744	0.0987713	87.4	-	-0.121721	-	-	-	-	-	-	-	-	-	-	3.0962	3.2017	2.7705	3.2804	2.662	5.1074	5.2053	5.1879	4.9706	5.2509	5.0305	4.9572	5.0474	5.1134	4.9138	4.8672	4.8176	4.7126	4.8427	4.836	3.2851	3.1419	3.6433	2.6083	2.9714	3.2755
pos_2848	2-amino-4-({1-[(carboxymethyl)-C-hydroxycarbonimidoyl]-2-[(3-oxo-1-phenylpropyl)sulfanyl]ethyl}-C-hydroxycarbonimidoyl)butanoic acid	metab_2845	-	HMDB0135282	457.171	pos	M+NH4	C19H25N3O7S	2.9378	0.130055	-	68.1	-8.70328	-	-	-	-	-	-	-	Organic acids and derivatives	Carboxylic acids and derivatives	Amino acids, peptides, and analogues	5.4644	5.5921	5.7195	5.6235	5.7734	5.0346	5.2171	5.0581	4.6754	4.7553	5.4931	5.3178	5.4154	5.5648	5.4723	5.6597	5.5277	5.5648	5.5208	5.5534	5.546	5.5402	5.5716	5.5834	5.5581	5.6582
pos_2852	Serotonin	metab_2849	C00780	HMDB0000259	177.102	pos	M+H	C10H12N2O	2.9657	0.0572618	84.9	-	-0.504564	50-67-9	Peptides;Hormones and transmitters	Amines;Neurotransmitters	map01100;map07211;map04750;map04540;map04976;map04024;map04080;map04361;map04726;map04742;map01063;map00380;map04721	Metabolic pathways; Serotonin receptor agonists/antagonists; Inflammatory mediator regulation of TRP channels; Gap junction; Bile secretion; cAMP signaling pathway; Neuroactive ligand-receptor interaction; Axon regeneration; Serotonergic synapse; Taste transduction; Biosynthesis of alkaloids derived from shikimate pathway; Tryptophan metabolism; Synaptic vesicle cycle	Metabolism;Drug Development;Organismal Systems;Cellular Processes;Organismal Systems;Environmental Information Processing;Environmental Information Processing;Organismal Systems;Organismal Systems;Organismal Systems;Metabolism;Metabolism;Organismal Systems	Global and overview maps;Target-based classification: G protein-coupled receptors;Sensory system;Cellular community - eukaryotes;Digestive system;Signal transduction;Signaling molecules and interaction;Development and regeneration;Nervous system;Sensory system;Chemical structure transformation maps;Amino acid metabolism;Nervous system	Organoheterocyclic compounds	Indoles and derivatives	Tryptamines and derivatives	3.212	3.1668	3.9494	3.0975	3.0995	3.9557	4.0155	4.361	3.8247	4.2865	5.3347	5.0112	5.5477	5.5825	5.6243	5.8789	5.9006	5.9876	5.9457	5.9669	6.1449	6.2608	6.2523	6.2428	6.4348	6.4833
pos_2860	4-Hydroxyproline galactoside	metab_2857	-	HMDB0029354	276.107	pos	M+H-H2O	C11H19NO8	3.0078	0.0474421	-	57.7	-0.95672	80185-44-0	-	-	-	-	-	-	Lipids and lipid-like molecules	Fatty Acyls	Fatty acyl glycosides	6.5727	6.5746	6.541	6.5616	6.5496	5.3773	5.4758	5.4105	5.5932	5.7907	5.5634	5.4352	5.7863	5.5266	5.5795	5.3471	5.4872	5.4156	5.3019	5.5454	5.2555	5.1526	5.2506	5.0972	5.6618	4.9075
pos_2877	3,4,5-trihydroxy-6-[4-(1-hydroxy-3-oxobutyl)-2-methoxyphenoxy]oxane-2-carboxylic acid	metab_2874	-	HMDB0135700	419.152	pos	M+CH3OH+H	C17H22O10	3.0568	0.0662608	-	65.4	-7.29126	-	-	-	-	-	-	-	Organic oxygen compounds	Organooxygen compounds	Carbohydrates and carbohydrate conjugates	5.4645	5.5537	5.5261	5.652	5.432	4.0845	4.5156	4.3116	4.2536	4.7315	3.9517	3.4558	3.7554	3.485	2.7428	2.7623	2.7544	2.7567	2.7463	2.7531	2.7464	2.7543	2.766	2.7482	3.6948	2.7435
pos_2878	Isoscopoletin	metab_2875	C18079	-	193.05	pos	M+H	C10H8O4	3.0638	0.0533297	94.4	-	-0.179263	-	-	-	-	-	-	-	-	-	-	5.0437	5.1418	5.0423	5.2002	4.9652	2.7721	3.2675	2.8573	3.2251	3.3349	3.5815	3.3896	3.6558	3.5131	3.4592	3.2897	3.3707	2.8093	3.5726	3.4537	3.413	3.6602	3.633	3.2408	2.8453	2.796
pos_2880	N-Butylscopolamine metabolite	metab_2877	-	-	212.164	pos	M+H	C12H21NO2	3.0777	0.0597733	90.6	-	-0.562556	-	-	-	-	-	-	-	-	-	-	5.5475	5.3286	5.1694	5.5287	5.3978	5.0318	4.9366	4.9805	5.0978	5.0186	5.1024	5.0618	5.038	5.0887	5.1763	5.03	5.0534	5.0793	5.0124	5.0766	4.9734	5.0012	5.031	4.9644	5.049	5.1695
pos_2881	Indolelactic acid	metab_2878	C02043	HMDB0000671	206.081	pos	M+H	C11H11NO3	3.0848	0.0548825	79.5	-	-0.44773	7417-65-4	-	-	-	-	-	-	Organoheterocyclic compounds	Indoles and derivatives	Indolyl carboxylic acids and derivatives	3.4625	3.612	3.2466	3.7006	4.0121	2.9776	3.7122	3.2556	3.3067	2.9879	4.8242	4.2575	5.0391	5.1343	5.2303	5.5876	5.5079	5.5544	5.5477	5.5784	5.4411	5.4499	5.6434	5.3764	5.6845	5.5185
pos_2911	Arginyl-Proline	metab_2908	-	HMDB0028717	236.15	pos	M+H-2H2O	C11H21N5O3	3.2191	0.06387	-	53.3	-0.832013	-	-	-	-	-	-	-	Organic acids and derivatives	Carboxylic acids and derivatives	Amino acids, peptides, and analogues	4.7374	4.7176	4.7405	4.8426	4.5567	5.0935	5.0778	5.2002	5.0944	5.1468	5.1377	4.9222	5.137	5.0354	5.0254	4.9779	5.03	4.9524	4.9931	5.0268	4.9611	4.9864	4.9742	4.9899	4.9467	4.966
pos_2922	5-Hydroxytryptophol glucuronide	metab_2919	-	HMDB0013200	322.128	pos	M+H-H2O	C16H21NO7	3.2681	0.0938188	-	76.2	-0.891644	-	-	-	-	-	-	-	Organic oxygen compounds	Organooxygen compounds	Carbohydrates and carbohydrate conjugates	5.2813	5.422	5.3099	5.4939	5.1593	0.3934	3.3167	3.0915	3.2118	4.6653	3.7525	0.4064	4.1361	3.725	3.7639	3.2292	4.3678	3.2828	3.9895	4.0374	0.4096	2.1843	3.4937	3.1539	4.0084	3.8473
pos_2956	Hexyl glucoside	metab_2953	-	HMDB0031688	306.191	pos	M+ACN+H	C12H24O6	3.4438	0.0663471	-	66.5	-1.48782	59080-45-4	-	-	-	-	-	-	Lipids and lipid-like molecules	Fatty Acyls	Fatty acyl glycosides	4.4144	4.4711	4.2089	4.32	4.1788	5.0743	5.122	5.0812	5.1212	5.1014	5.1619	5.18	5.1333	5.1912	5.1517	5.1444	5.1892	5.1168	5.1595	5.1165	5.111	5.1597	5.2198	5.1406	5.1414	5.1272
pos_2962	ETHYL SYRINGATE	metab_2959	-	-	227.091	pos	M+H	C11H14O5	3.4718	0.0694814	66.5	-	-0.721863	-	-	-	-	-	-	-	-	-	-	4.8282	4.851	4.7986	4.6961	4.7137	5.0379	5.0346	5.2504	4.6659	4.8974	5.1256	5.1871	5.1993	5.2169	5.1112	5.038	5.0574	5.0761	5.1118	5.0776	4.5546	4.4751	4.553	4.3807	4.5105	3.328
pos_2975	10-Hydroxymyristic acid methyl ester	metab_2972	-	HMDB0031061	297.181	pos	M+K	C15H30O3	3.5278	0.116839	-	50.8	-8.30689	-	-	-	-	-	-	-	Lipids and lipid-like molecules	Fatty Acyls	Fatty alcohols	3.1036	3.1452	3.1356	3.1073	3.1093	5.4952	5.1022	4.9828	4.8729	5.0334	4.6765	4.7422	4.706	4.5032	4.624	4.5821	4.6199	4.2635	4.3084	4.6164	4.3435	4.3329	4.0084	4.3651	4.3251	3.6974
pos_3020	2-(4-Methyl-5-thiazolyl)ethyl formate	metab_3017	-	HMDB0032420	360.105	pos	2M+NH4	C7H9NO2S	3.6403	0.0536206	-	75.3	0.622822	90731-56-9	-	-	-	-	-	-	Organoheterocyclic compounds	Azoles	Thiazoles	4.9434	5.1964	5.2543	4.9934	5.0985	5.0394	5.0654	5.1118	5.3389	5.4397	5.4205	5.0814	5.5427	5.292	5.227	5.2681	5.3384	5.1353	5.2104	5.2169	4.92	4.8971	4.9807	4.9108	5.2738	4.5672
pos_3037	P-CHLOROPHENYLALANINE	metab_3034	-	HMDB0033261	200.047	pos	M+H	C9H10ClNO2	3.6963	0.0253027	94	-	-0.482468	-	-	-	-	-	-	-	Phenylpropanoids and polyketides	2-arylbenzofuran flavonoids	Not Available	7.6187	7.5861	7.571	7.5569	7.648	7.6334	7.6266	7.6238	7.6286	7.5945	7.6186	7.6268	7.605	7.6339	7.628	7.6426	7.6145	7.6531	7.6314	7.6268	7.6201	7.6039	7.6087	7.6429	7.6235	7.6445
pos_3054	Fulvine	metab_3051	C10304	-	310.165	pos	M+H	C16H23NO5	3.7738	0.023559	63.1	-	-0.876672	-	-	-	-	-	-	-	-	-	-	5.526	5.5334	5.5282	5.516	5.3517	5.3644	5.4376	5.2837	5.4887	5.4054	5.3944	5.3023	5.3528	5.3523	5.2512	5.1365	5.1816	5.1936	5.1544	5.1917	5.0237	5.0721	5.1321	5.0236	5.042	5.1057
pos_3064	Piperochromanoic acid	metab_3061	-	HMDB0040634	401.17	pos	M+2Na-H	C22H28O4	3.8368	0.015437	-	58.8	1.23179	110979-03-8	-	-	-	-	-	-	Lipids and lipid-like molecules	Prenol lipids	Monoterpenoids	4.482	4.3359	4.076	4.4379	3.9948	5.6439	5.6878	5.9192	5.4914	5.5319	5.7763	5.7869	5.9642	5.8446	5.9128	6.0399	5.9664	5.8285	6.1018	5.9205	5.8959	5.8405	5.7912	5.7691	5.5876	6.301
pos_3091	3,4,5-trihydroxy-6-{[5-hydroxy-4-(4-hydroxy-3-methylbut-2-en-1-yl)-3-methoxy-8,17-dioxatetracyclo[8.7.0.0,.0,]heptadeca-1(10),2(7),3,5,11(16),12,14-heptaen-14-yl]oxy}oxane-2-carboxylic acid	metab_3088	-	HMDB0134916	562.192	pos	M+NH4	C27H28O12	3.9628	0.0827318	-	56.5	0.419084	-	-	-	-	-	-	-	Phenylpropanoids and polyketides	Isoflavonoids	Furanoisoflavonoids	4.7869	5.0219	5.0395	5.0728	4.945	3.5704	4.3805	4.9083	3.5837	3.5806	5.4661	5.2501	5.3456	5.0231	5.4851	5.2627	5.4415	4.9376	4.8834	5.6883	5.5749	5.3559	5.1587	5.0894	5.1572	5.1906
pos_3102	L-Thyronine	metab_3099	-	HMDB0000667	315.133	pos	M+ACN+H	C15H15NO4	4.0188	0.138521	-	53.9	-2.23402	1596-67-4	-	-	-	-	-	-	Organic acids and derivatives	Carboxylic acids and derivatives	Amino acids, peptides, and analogues	5.278	5.3575	5.2856	5.442	5.0195	0.0005	0.0005	3.1338	0.0006	0.0005	0.0006	0.0006	0.0006	3.1121	0.0006	0.0006	1.7255	0.0006	0.0006	0.2592	0.0006	0.755	0.5498	1.8286	1.0807	0.0006
pos_3150	(+/-)7-epi Jasmonic Acid	metab_3147	-	-	211.133	pos	M+H	C12H18O3	4.2009	0.045284	84.6	-	-0.0536204	-	-	-	-	-	-	-	-	-	-	5.2721	5.2874	5.1985	5.3642	5.1315	5.2364	5.2826	5.2119	5.3038	5.3296	5.3228	5.2899	5.2432	5.2803	5.247	5.1847	5.1935	5.2646	5.2112	5.1991	5.0846	5.1135	5.1651	5.0976	5.135	5.029
pos_3155	Epioxylubimin	metab_3152	-	HMDB0035613	291.134	pos	M+K	C15H24O3	4.2149	0.0450156	-	59.1	-8.62853	69350-60-3	-	-	-	-	-	-	Lipids and lipid-like molecules	Prenol lipids	Sesquiterpenoids	4.466	4.6068	4.4265	4.6662	3.8587	5.0141	5.0192	4.9763	4.965	4.9763	5.1322	5.1468	5.1187	5.172	5.2002	5.2477	5.226	5.2839	5.2074	5.2381	5.3467	5.4765	5.5118	5.4605	5.4713	5.4533
pos_3190	Pentacarboxyl porphyrinogen III	metab_3187	-	HMDB0001957	665.263	pos	M+H-2H2O	C37H40N4O10	4.3269	0.0620142	-	56.4	3.05585	-	-	-	-	-	-	-	Organoheterocyclic compounds	Tetrapyrroles and derivatives	Porphyrins	6.3892	6.3707	6.29	6.4871	6.1515	3.8883	3.1235	3.1077	3.1287	3.1256	3.1573	3.1369	3.1553	3.1536	3.1386	3.1581	3.1502	3.1525	3.1421	3.1489	3.1422	3.1746	3.1618	3.144	3.1506	3.1392
pos_3242	Tumonoic Acid E	metab_3239	-	-	326.232	pos	M+H	C18H31NO4	4.5236	0.0184725	56	-	-1.32469	-	-	-	-	-	-	-	-	-	-	3.1769	3.3619	3.285	3.9699	3.1826	5.3118	5.2834	5.3698	5.4219	5.3333	5.4212	5.3555	5.3994	5.3623	5.3818	5.0119	5.1159	5.1516	5.0257	5.0631	4.8379	4.8292	4.8789	4.8127	4.7071	4.0145
pos_3283	Methionyl-Histidine	metab_3280	-	HMDB0028975	309.101	pos	M+Na	C11H18N4O3S	4.6706	0.14283	-	64.4	5.1663	-	-	-	-	-	-	-	Organic acids and derivatives	Carboxylic acids and derivatives	Amino acids, peptides, and analogues	2.1247	2.0946	2.4504	2.0443	1.6576	5.2132	5.2527	5.1736	5.0283	5.0677	5.0964	5.1321	5.0181	5.0124	5.0021	4.6686	4.6959	4.6217	4.4894	4.5872	4.2726	4.1233	4.373	4.4306	4.3493	4.3562
pos_3291	4-Phenethylphenol	metab_3288	C14340	-	199.112	pos	M+H	C14H14O	4.6992	0.122168	52.1	-	-0.178043	-	-	-	-	-	-	-	-	-	-	4.9207	5.024	4.9057	5.1006	4.8057	4.5459	4.29	4.4918	4.3812	4.4621	4.2384	4.0483	4.311	4.0683	4.2982	3.7747	3.9378	3.8982	3.8475	3.962	3.2782	3.4738	3.6578	3.4227	3.7577	3.1402
pos_3293	Dihydro-O-methylsterigmatocystin	metab_3290	C03944	HMDB0030591	358.128	pos	M+NH4	C19H16O6	4.6992	0.0297343	-	58.6	-1.61166	21793-91-9	-	-	map01100;map01110;map00254	Metabolic pathways; Biosynthesis of secondary metabolites; Aflatoxin biosynthesis	Metabolism;Metabolism;Metabolism	Global and overview maps;Global and overview maps;Biosynthesis of other secondary metabolites	Organoheterocyclic compounds	Benzopyrans	1-benzopyrans	4.3922	4.2313	4.3492	4.3542	4.5859	4.5758	4.4101	4.6451	4.2399	4.218	4.6644	4.8879	4.9392	4.9047	5.0484	5.243	5.1169	5.1892	5.3026	4.9479	5.3345	5.39	5.4514	5.4211	5.2072	5.895
pos_3321	4-formyl Indole	metab_3318	-	-	146.06	pos	M+H	C9H7NO	4.8049	0.0442102	87.3	-	-0.571459	-	-	-	-	-	-	-	-	-	-	4.8655	5.0793	4.8571	4.8669	4.8066	5.5088	5.6308	5.3752	5.6613	5.6103	5.3221	5.2969	5.3192	5.2422	5.2513	5.2272	5.2439	5.1967	5.2445	5.2224	5.3981	5.4803	5.5776	5.3578	5.4516	5.3796
pos_3330	Hirsutic acid C	metab_3327	C09683	-	265.143	pos	M+H	C15H20O4	4.8399	0.0311834	55.1	-	-2.02026	-	-	-	-	-	-	-	-	-	-	5.5197	5.579	5.4838	5.426	5.1071	5.2812	5.3919	5.2002	5.5686	5.3232	5.3117	5.2899	5.3512	5.3409	5.3062	5.3129	5.3153	5.3192	5.3011	5.3309	5.4115	5.4334	5.4288	5.3567	5.3858	5.3923
pos_3389	Tolmetin glucuronide	metab_3385	-	HMDB0042044	398.123	pos	M+H-2H2O	C21H23NO9	5.0786	0.0578102	-	58.9	-0.988385	71595-19-2	-	-	-	-	-	-	Organic oxygen compounds	Organooxygen compounds	Carbohydrates and carbohydrate conjugates	0.4114	0.4373	1.6261	0.4136	1.0575	6.1418	5.6437	5.5851	5.3756	5.9177	1.8298	4.9247	4.9674	5.0826	4.9067	4.5488	4.2264	0.4874	2.7457	4.4294	1.5438	3.609	2.9206	0.4816	2.5526	0.6965
pos_3404	Phaseolus e	metab_3400	-	HMDB0035039	549.196	pos	M+Na	C25H34O12	5.1626	0.229203	-	64.7	3.63443	-	-	-	-	-	-	-	Lipids and lipid-like molecules	Prenol lipids	Terpene glycosides	2.8945	5.2427	5.7261	3.4648	4.3813	4.3084	2.9834	4.0052	4.9583	5.4149	5.101	2.9969	5.2541	4.671	4.4581	3.018	4.6728	4.1153	4.6191	5.3669	3.9832	4.5868	3.2417	4.0554	5.5325	3.5601
pos_3413	2,4,6-undecatrienal	metab_3409	-	LMFA06000069	165.127	pos	M+H	C11H16O	5.2396	0.0344292	51.4	-	-0.294305	-	-	-	-	-	-	-	-	-	-	5.127	5.2317	5.1144	5.2453	4.9798	5.1664	5.228	5.1624	5.2465	5.2522	5.2897	5.2427	5.2665	5.3086	5.2561	5.2692	5.2567	5.2697	5.252	5.253	5.2664	5.2676	5.3027	5.2509	5.2697	5.2362
pos_3423	Corchorifatty acid F	metab_3419	-	HMDB0035919	346.258	pos	M+NH4	C18H32O5	5.2607	0.0464288	-	87.2	-1.0975	95341-44-9	-	-	-	-	-	-	Lipids and lipid-like molecules	Fatty Acyls	Lineolic acids and derivatives	3.7851	4.5812	4.2972	4.2859	5.0325	4.924	5.0102	5.1453	5.0488	5.6473	5.0305	5.3613	5.1128	5.1418	5.1562	5.1361	5.0522	5.1106	5.0032	5.1007	5.0064	5.0682	5.0549	4.9559	4.8612	4.6815
pos_3447	Eriojaposide B	metab_3443	C17889	HMDB0038029	539.247	pos	M+Na	C25H40O11	5.4217	0.199953	-	72.8	1.0942	351412-97-0	-	-	-	-	-	-	Lipids and lipid-like molecules	Fatty Acyls	Fatty acyl glycosides	5.6308	5.9779	5.9817	6.1266	5.6292	3.8295	4.1559	4.4	4.5803	4.6108	3.526	3.5056	3.524	3.5223	3.5073	3.5267	3.5189	3.5212	3.5108	3.5176	3.5109	3.5187	3.5304	3.5126	3.5192	3.5079
pos_3449	Ethyl 3-hydroxydodecanoate	metab_3445	-	HMDB0059850	262.237	pos	M+NH4	C14H28O3	5.4287	0.0347673	-	73.3	-1.03774	-	-	-	-	-	-	-	Lipids and lipid-like molecules	Fatty Acyls	Fatty alcohols	4.2545	4.5344	4.4843	4.4364	4.6881	4.3517	4.6222	4.5009	4.4194	4.5408	4.6106	4.7581	4.4758	4.4801	5.0321	4.5427	4.6463	4.4619	4.3205	5.2766	4.5754	4.2562	4.2888	4.4691	4.3532	4.9639
pos_3458	2-(2,4-dihydroxyphenyl)-5,7-dihydroxy-6-(3-methylbut-2-en-1-yl)-3,4-dihydro-2H-1-benzopyran-4-one	metab_3454	-	HMDB0132506	420.144	pos	M+ACN+Na	C20H20O6	5.4777	0.0421441	-	67.7	5.51871	-	-	-	-	-	-	-	Phenylpropanoids and polyketides	Flavonoids	Flavans	3.9751	4.0167	4.0071	3.9788	3.9809	5.8841	5.6485	5.5345	4.8211	5.4514	4.4722	5.7787	5.6673	6.1407	5.7119	6.0734	5.6903	5.3748	5.4526	5.6759	4.5761	5.5719	5.1264	4.5065	4.1994	4.9217
pos_3471	(S)-alpha-Terpinyl glucoside	metab_3467	-	HMDB0029856	358.222	pos	M+ACN+H	C16H28O6	5.5337	0.0174701	-	77.2	-1.38832	114673-99-3	-	-	-	-	-	-	Organic oxygen compounds	Organooxygen compounds	Carbohydrates and carbohydrate conjugates	5.647	5.7177	5.6142	5.5423	5.3581	5.6844	5.563	5.501	5.8088	5.6221	5.7762	5.6269	5.5263	5.5409	5.5099	5.1351	5.4296	5.4321	5.3606	5.3448	4.3953	4.3916	4.5879	4.4042	4.1979	3.8255
pos_3479	Xi-7-Hydroxyhexadecanedioic acid	metab_3475	-	HMDB0037830	344.243	pos	M+ACN+H	C16H30O5	5.5617	0.00813483	-	62.3	-1.27297	-	-	-	-	-	-	-	Lipids and lipid-like molecules	Fatty Acyls	Fatty acids and conjugates	5.1781	5.5078	5.2386	5.2223	5.0332	5.9319	5.9096	5.8333	6.183	6.1033	6.2063	6.1593	6.0484	6.1191	6.0682	5.9851	6.1278	6.0796	5.9761	6.0552	6.0039	5.9745	6.03	5.9331	5.8583	5.4409
pos_3505	6,10-Dimethyl-5(E),9-undecadien-2-one	metab_3501	-	LMFA11000696	195.174	pos	M+H	C13H22O	5.7087	0.0647984	55.9	-	-0.43153	-	-	-	-	-	-	-	-	-	-	3.1419	3.5402	3.3392	3.2476	2.9493	4.1787	4.3777	4.1885	4.0729	4.275	4.499	4.3831	4.3874	4.433	4.3758	5.0515	4.8771	4.8338	4.94	4.8725	5.3428	5.3188	5.4003	5.3173	5.2672	5.3514
pos_3534	Cinncassiol C3	metab_3530	C17641	HMDB0036859	383.204	pos	M+H	C20H30O7	5.8347	0.0244854	76.3	-	-7.23928	64979-94-8	-	-	-	-	-	-	Lipids and lipid-like molecules	Prenol lipids	Sesquiterpenoids	6.7197	6.6793	6.7694	6.7568	6.6373	6.5617	6.6212	6.5796	6.6253	6.5973	6.6699	6.5835	6.6051	6.6209	6.5587	6.4954	6.532	6.5369	6.5255	6.5316	6.3677	6.4111	6.4751	6.3758	6.3928	6.4418
pos_3536	3-Indolepropionic acid	metab_3532	-	HMDB0002302	190.086	pos	M+H	C11H11NO2	5.8417	0.0610967	58.7	-	-0.501729	-	-	-	-	-	-	-	Organoheterocyclic compounds	Indoles and derivatives	Indolyl carboxylic acids and derivatives	1.6503	1.5174	2.7472	1.4806	1.4826	3.0108	3.5039	3.146	3.2365	1.5655	4.1848	3.6511	4.4278	4.5507	4.4215	4.831	4.6963	4.6858	4.8035	4.8405	4.864	4.6344	4.4526	4.5019	4.5453	4.6257
pos_3552	Artemin	metab_3548	-	HMDB0034696	249.146	pos	M+H-H2O	C15H22O4	5.9257	0.0308726	-	69.3	-9.40149	22149-38-8	-	-	-	-	-	-	Lipids and lipid-like molecules	Prenol lipids	Terpene lactones	5.1119	5.2827	5.2167	4.9793	4.7699	5.4311	5.6991	5.5357	5.7875	5.5926	5.5746	5.6639	5.6079	5.598	5.6327	5.6434	5.6234	5.6959	5.6469	5.6123	5.5523	5.6106	5.69	5.6336	5.5828	5.6047
pos_3560	3E,5E-tridecadienoic acid	metab_3556	-	LMFA01030244	211.169	pos	M+H	C13H22O2	5.9607	0.019626	59.7	-	-0.698002	-	-	-	-	-	-	-	-	-	-	4.388	4.4886	4.3888	4.4809	4.1033	5.3047	5.5746	5.5381	5.7749	5.5616	5.6966	5.7399	5.9058	5.8756	5.9135	6.2198	6.2016	6.3544	6.2674	6.2803	6.0279	6.1493	6.1855	6.1103	6.0221	5.9439
pos_3612	Tocopheronic acid	metab_3608	-	HMDB0030555	295.151	pos	M+H	C16H22O5	6.0937	0.029296	74.6	-	-8.62465	1948-76-1	-	-	-	-	-	-	Lipids and lipid-like molecules	Prenol lipids	Sesquiterpenoids	5.3433	5.1653	5.329	5.2312	5.4367	5.2578	5.3461	5.2545	5.3539	5.2093	5.3527	5.3417	5.2729	5.3593	5.3387	5.3151	5.2309	5.3217	5.3064	5.2456	5.262	5.2727	5.2534	5.2279	5.2192	5.3299
pos_3635	Eupatorin	metab_3631	-	LMPK12111239	345.097	pos	M+H	C18H16O7	6.1427	0.0744185	55.1	-	-0.903786	-	-	-	-	-	-	-	-	-	-	5.4514	4.8883	3.9185	3.2465	3.2485	4.0418	3.8284	4.2327	4.8046	3.4685	3.3656	3.7988	4.4109	3.8541	4.0345	3.8785	4.3777	3.3609	4.139	3.9075	3.905	4.888	3.8718	3.9831	3.3589	4.844
pos_3643	2,6-Dihydroxynaphthalene	metab_3639	-	-	161.06	pos	M+H	C10H8O2	6.1567	0.167597	54.6	-	-0.579545	-	-	-	-	-	-	-	-	-	-	3.986	3.6866	4.4877	3.7166	4.2873	4.7089	4.1041	4.9451	3.3428	3.521	3.5936	2.9464	4.5758	3.3793	3.2997	3.7237	3.9774	3.8425	4.1314	3.6653	4.737	4.126	3.7912	2.9021	4.0737	3.6316
pos_3688	12-Oxo-2,3-dinor-10,15-phytodienoic acid	metab_3684	-	HMDB0032090	265.18	pos	M+H	C16H24O3	6.2402	0.0336554	60	-	-0.854029	197247-23-7	-	-	-	-	-	-	Lipids and lipid-like molecules	Fatty Acyls	Eicosanoids	5.3954	5.4195	5.342	5.4124	5.2274	5.2643	5.3444	5.3825	5.3684	5.3341	5.4685	5.4706	5.4354	5.3848	5.4278	5.3022	5.3519	5.3181	5.396	5.2937	5.2661	5.357	5.3957	5.3757	5.3127	5.4147
pos_3702	6-hydroxysphingosine	metab_3698	-	LMSP01080003	316.284	pos	M+H	C18H37NO3	6.2682	0.0406116	77.8	-	-1.08671	-	-	-	-	-	-	-	-	-	-	5.8428	5.5583	5.8063	5.691	6.2246	7.0814	7.218	7.0173	7.0376	6.9683	7.1261	7.0734	7.1438	7.2197	6.9692	7.2991	7.1235	7.3309	7.3224	7.1083	7.2768	7.2893	7.5823	7.381	7.4068	7.3978
pos_3704	Lucidenic acid J	metab_3700	-	HMDB0035700	508.29	pos	M+NH4	C27H38O8	6.2682	0.032848	-	57.1	-0.727285	-	-	-	-	-	-	-	Lipids and lipid-like molecules	Prenol lipids	Triterpenoids	2.6351	2.6766	3.2614	2.6387	2.6408	5.866	5.6922	5.3986	5.8021	5.7483	6.1909	6.2464	6.1273	6.113	6.0561	5.8048	6.0262	5.9831	5.9721	5.9185	5.4117	5.4796	5.4246	5.4679	5.2311	2.7396
pos_3720	Prostaglandin PGE2 1-glyceryl ester	metab_3716	-	HMDB0013043	409.257	pos	M+H-H2O	C23H38O7	6.2961	0.104216	-	57.1	-4.13643	-	-	-	-	-	-	-	Lipids and lipid-like molecules	Fatty Acyls	Eicosanoids	5.8113	5.7527	5.8744	5.9894	5.7634	5.7066	5.8697	5.7243	5.7978	5.8152	5.7337	5.564	5.6804	5.6101	5.5942	5.5732	5.6499	5.616	5.6796	5.6011	5.5293	5.5525	5.572	5.508	5.3447	5.6107
pos_3723	Avocadene	metab_3719	-	LMFA05000639;HMDB0031042	328.284	pos	M+ACN+H	C17H34O3	6.3029	0.0404328	-	71	-1.4791	83797-45-9	-	-	-	-	-	-	Lipids and lipid-like molecules	Fatty Acyls	Fatty alcohols	5.6273	5.6987	5.9126	5.5145	6.661	7.3225	7.6028	7.3174	7.0701	7.2224	7.4201	7.487	7.4614	7.3429	7.4707	7.6103	7.5762	7.3751	7.3715	7.7341	7.7731	7.8256	7.6907	7.7612	7.7874	8.0047
pos_3753	(+/-)11,12-DHET	metab_3749	-	-	339.252	pos	M+H	C20H34O4	6.3589	0.0564771	64.2	-	-3.97801	-	-	-	-	-	-	-	-	-	-	5.1692	5.5224	5.1411	5.3264	4.8524	5.7848	5.7472	5.7928	5.7903	5.765	6.0113	6.2042	6.0825	6.0395	6.0145	6.2545	6.2507	6.3084	6.3074	6.2202	6.1419	6.2588	6.2906	6.1743	6.1952	6.2399
pos_3778	Myxalamid A	metab_3774	C12158	-	416.315	pos	M+H	C26H41NO3	6.3937	0.125448	50.9	-	-1.6644	-	-	-	-	-	-	-	-	-	-	4.5116	4.2898	4.4877	4.272	4.4296	5.0413	5.0233	4.7471	4.5152	4.7248	5.4221	5.5629	5.3631	5.4982	5.4158	5.786	5.8735	5.8709	5.8655	5.662	5.9629	6.0589	6.0724	6.0572	5.9484	5.5847
pos_3824	Sorbitan stearate	metab_3820	-	HMDB0029888;LMFA07011020	453.32	pos	M+Na	C24H46O6	6.5198	0.0741892	-	60.7	4.21966	1338-41-6	-	-	-	-	-	-	Lipids and lipid-like molecules	Fatty Acyls	Fatty acid esters	5.0257	4.9862	4.8899	4.8629	4.9734	4.9027	4.7846	4.7467	4.7275	4.6558	5.1001	4.9039	4.6182	4.9555	4.8842	5.0889	5.1477	5.0344	4.8777	4.7627	4.951	5.1486	4.956	5.0432	4.7468	5.4581
pos_3830	Withaperuvin H	metab_3826	-	HMDB0034061	579.26	pos	M+H	C30H42O9S	6.5267	0.0546707	-	55.3	-4.00316	-	-	-	-	-	-	-	Lipids and lipid-like molecules	Steroids and steroid derivatives	Steroid lactones	4.7014	4.2241	4.7571	4.5539	3.0508	6.1898	6.0065	6.039	6.3253	6.2585	6.4554	6.5067	6.3723	6.2954	6.5215	6.2608	6.3911	6.3176	6.2383	6.442	6.1927	6.1944	6.1496	6.1358	6.3217	6.1856
pos_3841	Physapubenolide	metab_3837	-	HMDB0033976;LMST01160015	551.264	pos	M+Na	C30H40O8	6.5477	0.053023	-	83.4	5.35733	100217-92-3	-	-	-	-	-	-	Lipids and lipid-like molecules	Steroids and steroid derivatives	Steroid lactones	5.5603	5.6019	5.5922	5.5639	5.566	5.9252	6.0876	6.0064	6.3987	6.1231	6.0323	6.082	5.9035	5.6794	5.8645	5.8321	5.9699	5.8905	5.911	5.9209	6.0195	5.9813	6.0351	5.8866	6.0801	6.302
pos_3849	LysoPC(18:1(11Z))	metab_3845	C04230	HMDB0010385	522.355	pos	M+H	C26H52NO7P	6.5687	0.0116125	62.9	-	-1.06155	-	Lipids	Phospholipids	map00564;map05231	Glycerophospholipid metabolism; Choline metabolism in cancer	Metabolism;Human Diseases	Lipid metabolism;Cancer: overview	Lipids and lipid-like molecules	Glycerophospholipids	Glycerophosphocholines	5.8433	5.9236	6.3704	5.8659	5.6497	5.4587	5.5636	5.4077	5.586	6.0744	5.8171	4.9154	6.1367	5.8296	5.455	5.3864	5.7237	5.6104	5.5588	5.9163	5.2047	5.4852	5.4804	5.4743	6.4212	4.8391
pos_3871	(Z)-9-Cycloheptadecen-1-one	metab_3867	-	HMDB0031336	268.263	pos	M+NH4	C17H30O	6.6037	0.0323331	-	57.3	-1.13764	542-46-1	-	-	-	-	-	-	Organic oxygen compounds	Organooxygen compounds	Carbonyl compounds	5.4608	5.5166	5.4611	5.5011	5.5815	5.5216	5.3849	5.5787	5.5424	5.4735	5.5464	5.4436	5.6006	5.5992	5.496	5.5378	5.5911	5.4967	5.5641	5.3166	5.5505	5.5281	5.5014	5.5342	5.5737	5.3835
pos_3872	17-Epiestriol	metab_3868	-	HMDB0000356;LMST02010049	289.179	pos	M+H	C18H24O3	6.6037	0.0218913	54.9	-	-1.66426	1228-72-4	-	-	-	-	-	-	Lipids and lipid-like molecules	Steroids and steroid derivatives	Estrane steroids	5.8874	6.0691	5.943	5.9499	5.7481	6.128	6.3146	5.988	6.3172	6.2109	6.1222	6.1301	6.0678	6.0151	6.0386	5.834	5.976	5.9549	5.8819	5.8867	5.8191	5.7678	5.9995	5.8337	5.793	5.6956
pos_3877	2-Hexen-1-ol	metab_3873	-	HMDB0030952	218.211	pos	2M+NH4	C6H12O	6.6107	0.070752	-	55.7	-0.459767	928-95-0	-	-	-	-	-	-	Lipids and lipid-like molecules	Fatty Acyls	Fatty alcohols	4.5059	4.6171	4.9445	4.6694	5.273	4.339	5.0711	4.9045	4.598	4.94	5.1306	5.1452	4.7603	4.8986	5.479	4.888	5.0652	4.9762	4.3541	5.7908	4.91	4.6269	4.4895	4.7744	4.552	5.5134
pos_3921	LysoPC(0:0/18:0)	metab_3917	-	HMDB0011128	524.371	pos	M+H	C26H54NO7P	6.7221	0.149284	65.9	-	0.141777	4421-58-3	-	-	-	-	-	-	Lipids and lipid-like molecules	Glycerophospholipids	Glycerophosphocholines	6.0496	6.1037	6.3355	6.0767	5.8959	5.1417	5.2376	5.225	5.3842	5.6147	5.3562	4.7257	5.502	5.4491	5.2758	5.0658	5.01	4.9954	4.9591	5.232	5.236	5.0486	3.0492	4.7665	5.5899	3.0266
pos_3922	DG(18:4(6Z,9Z,12Z,15Z)/16:0/0:0)	metab_3918	-	HMDB0007330	589.482	pos	M+H	C37H64O5	6.7221	0.192296	57.4	-	-0.453271	-	-	-	-	-	-	-	Lipids and lipid-like molecules	Fatty Acyls	Lineolic acids and derivatives	6.1051	6.1002	6.0386	6.1431	5.6034	4.4928	4.9398	4.4957	5.1358	5.1462	4.5423	4.263	4.7141	4.4737	4.0014	4.2999	4.5343	4.6085	4.2347	4.5844	4.685	4.2421	4.8562	4.0068	4.3242	4.002
pos_3962	C16 Sphinganine	metab_3958	C13915	LMSP01040001	274.274	pos	M+H	C16H35NO2	6.7989	0.0176295	72.8	-	-1.02894	-	-	-	-	-	-	-	-	-	-	7.3509	7.4822	7.4383	7.4428	7.4856	7.4386	7.5698	7.5568	7.4982	7.5415	7.5102	7.6288	7.5048	7.4248	7.8486	7.5477	7.6064	7.4712	7.4413	8.0642	7.5593	7.3945	7.4052	7.4358	7.4345	7.7839
pos_3965	Xestoaminol C	metab_3961	-	LMSP01080033	230.248	pos	M+H	C14H31NO	6.8059	0.0230079	63.5	-	-0.37485	-	-	-	-	-	-	-	-	-	-	5.5745	5.7003	5.6782	5.7167	5.7138	5.7346	5.787	5.8177	5.8481	5.7308	5.8161	5.9112	5.8086	5.8019	6.051	5.8532	5.8696	5.8417	5.7686	6.2729	5.9348	5.872	5.8474	5.8672	5.8517	6.1132
pos_4017	Ent-16b,19-Kauranediol 19-acetate	metab_4013	-	HMDB0036801	366.3	pos	M+NH4	C22H36O3	6.9388	0.049981	-	59.6	-1.05015	30320-70-8	-	-	-	-	-	-	Lipids and lipid-like molecules	Prenol lipids	Diterpenoids	3.9901	3.9697	3.5396	3.5298	3.9526	5.6239	5.3576	5.433	5.3555	5.2785	5.347	5.4535	5.548	5.3978	5.2994	5.4249	5.3828	5.5252	5.4156	5.5069	5.5521	5.6828	5.7285	5.5755	5.7214	5.626
pos_4675	Cytosine	metab_4670	C00380	HMDB0000630	112.051	pos	M+H	C4H5N3O	8.7188	0.0416641	71.6	-	1.96552	71-30-7	Nucleic acids	Bases	map00240;map01100	Pyrimidine metabolism; Metabolic pathways	Metabolism;Metabolism	Nucleotide metabolism;Global and overview maps	Organoheterocyclic compounds	Diazines	Pyrimidines and pyrimidine derivatives	5.4765	5.4602	5.4613	5.4258	5.488	5.494	5.4884	5.4683	5.4676	5.4623	5.452	5.4807	5.4489	5.4721	5.4566	5.4819	5.4588	5.4662	5.4724	5.4601	5.4533	5.4502	5.4261	5.49	5.4365	5.4891
pos_4697	DG(18:2n6/0:0/18:4n3)	metab_4692	-	HMDB0056291	659.523	pos	M+CH3OH+H	C40H66O5	8.6418	0.0558879	-	64.2	-3.03357	-	-	-	-	-	-	-	Lipids and lipid-like molecules	Glycerolipids	Diradylglycerols	6.489	6.526	6.4704	6.4856	6.5863	6.5528	6.571	6.5551	6.6066	6.5042	6.6026	6.5539	6.5159	6.5935	6.5658	6.5856	6.5554	6.6272	6.5865	6.6061	6.5893	6.5462	6.5642	6.5685	6.5964	6.5771
pos_4714	DG(20:1(11Z)/16:1(9Z)/0:0)	metab_4709	-	HMDB0007389	643.527	pos	M+Na	C39H72O5	8.5998	0.0351674	-	86.5	-0.414241	-	-	-	-	-	-	-	Lipids and lipid-like molecules	Glycerolipids	Diradylglycerols	6.9974	7.0374	6.9909	7.0138	7.0658	7.0646	7.0968	7.05	7.0989	7.0374	7.1037	7.0614	7.0421	7.0794	7.0611	7.0958	7.0618	7.1177	7.0643	7.1097	7.079	7.0555	7.0821	7.0844	7.0924	7.1199
pos_4738	3-acetamidobutanal	metab_4733	-	HMDB0059649	130.086	pos	M+H	C6H11NO2	8.5578	0.141324	59.6	-	0.176072	-	-	-	-	-	-	-	Organic oxygen compounds	Organooxygen compounds	Carbonyl compounds	6.0798	6.1001	6.0583	6.0725	6.116	6.1513	6.1445	6.141	6.1555	6.1485	6.1749	6.1642	6.1767	6.1786	6.1925	6.219	6.2067	6.2156	6.2141	6.2327	6.2306	6.2288	6.2332	6.2543	6.2456	6.2683
pos_4789	(+/-)-(Z)-2-(5-Tetradecenyl)cyclobutanone	metab_4784	-	-	306.279	pos	M+ACN+H	C18H32O	7.787	0.280345	-	83.2	-0.76288	-	-	-	-	-	-	-	-	-	-	4.8572	4.829	5.1861	5.104	4.9696	4.7829	4.3791	4.4143	4.5634	4.492	3.9432	4.3717	3.5987	3.9701	3.7442	3.2687	3.4694	3.2944	3.168	3.2021	3.2319	3.1759	3.1876	3.1698	3.1764	3.1651
pos_4813	DG(15:0/22:1(13Z)/0:0)	metab_4808	-	HMDB0007087	654.602	pos	M+NH4	C40H76O5	7.5762	0.0826721	-	63.8	-2.11445	-	-	-	-	-	-	-	Lipids and lipid-like molecules	Glycerolipids	Diradylglycerols	5.6046	5.2761	5.4653	5.3503	4.9299	5.2876	5.0032	5.2406	5.3057	5.3081	5.5299	5.7357	5.5004	5.3321	5.68	5.4528	5.5742	5.5594	5.6466	5.5359	5.5412	5.5655	5.4864	5.6368	5.5454	5.5796
pos_4814	DG(18:0/18:1(11Z)/0:0)	metab_4809	-	HMDB0007159	640.587	pos	M+NH4	C39H74O5	7.5762	0.00733172	-	55.1	-1.15652	-	-	-	-	-	-	-	Lipids and lipid-like molecules	Glycerolipids	Diradylglycerols	7.1698	7.1718	7.1536	7.1418	7.2045	7.1881	7.2093	7.1721	7.191	7.1779	7.2019	7.1916	7.1876	7.2016	7.1908	7.2095	7.1811	7.1994	7.2001	7.2083	7.1871	7.193	7.165	7.1894	7.1827	7.2036
pos_4858	PG(a-13:0/i-12:0)	metab_4853	-	HMDB0116642	607.391	pos	M+H-H2O	C31H61O10P	7.3935	0.108756	-	62.6	-9.6075	-	-	-	-	-	-	-	Lipids and lipid-like molecules	Glycerophospholipids	Glycerophosphoglycerols	5.6629	5.7137	5.6434	5.6407	5.6568	5.7159	5.5157	5.6398	5.6382	5.6534	5.7078	5.7661	5.6598	5.6058	5.6974	5.5965	5.6078	5.6106	5.7524	5.6587	5.7158	5.6445	5.6655	5.7369	5.5587	5.8062
pos_4897	Cer(d14:1(4E)/20:0(2OH))	metab_4892	-	LMSP02010068	554.514	pos	M+H	C34H67NO4	7.2395	0.0834716	81.3	-	-0.415957	-	-	-	-	-	-	-	-	-	-	3.9471	3.9887	3.979	3.9507	3.9528	5.6191	5.6848	5.5581	5.3612	5.3882	5.5733	5.6301	5.6144	5.5986	5.632	5.6927	5.6396	5.6934	5.6428	5.665	5.7438	5.7786	5.7646	5.654	5.7637	5.7098
pos_4928	1-Hydroxy-1-phenyl-3-octadecanone	metab_4923	-	HMDB0035679	402.335	pos	M+ACN+H	C24H40O2	7.1345	0.0443287	-	62.2	-5.73589	-	-	-	-	-	-	-	Lipids and lipid-like molecules	Fatty Acyls	Fatty alcohols	4.417	4.2105	4.2833	4.1726	4.2356	4.5411	4.2618	4.611	4.3957	4.4586	4.9805	5.1193	4.883	4.9898	4.8292	5.3529	5.4681	5.4081	5.3348	5.4058	5.3661	5.658	5.535	5.5946	5.384	4.9793
pos_4944	Ixocarpalactone A	metab_4939	-	HMDB0034393;LMST01160011	537.302	pos	M+CH3OH+H	C28H40O8	7.0925	0.0766289	-	55	-7.42673	71801-45-1	-	-	-	-	-	-	Lipids and lipid-like molecules	Steroids and steroid derivatives	Steroid lactones	6.5046	6.2546	6.3381	6.3483	6.3035	5.8811	5.5997	5.6985	5.3559	5.8354	5.8437	5.5381	5.8884	5.8468	5.5244	5.4559	5.459	5.6487	5.7825	5.6586	3.7044	5.4612	5.2869	5.4952	5.6966	5.336
pos_4974	Floionolic acid	metab_4969	C19621	HMDB0034295;LMFA02000147	315.253	pos	M+H-H2O	C18H36O5	7.0226	0.12513	-	55.3	-1.09243	17705-68-9	-	-	map00073	Cutin, suberine and wax biosynthesis	Metabolism	Lipid metabolism	Lipids and lipid-like molecules	Fatty Acyls	Fatty acids and conjugates	6.7407	6.6297	6.6532	6.6424	6.6489	6.8003	6.6682	6.7934	6.688	6.7681	6.7647	6.7027	6.8029	6.7182	6.8031	6.7405	6.8145	6.7621	6.7831	6.8015	6.734	6.8558	6.7433	6.8458	6.785	6.816
pos_4975	8-Hydroxy-4(6)-lactarene-5,14-diol	metab_4970	-	HMDB0035780	287.221	pos	M+CH3OH+H	C15H26O3	7.0226	0.0190571	-	77.3	-1.45178	-	-	-	-	-	-	-	Organic oxygen compounds	Organooxygen compounds	Alcohols and polyols	6.921	6.8654	6.871	6.8377	6.9245	6.9328	6.9105	6.9394	6.8987	6.9201	6.9042	6.9034	6.904	6.9197	6.9235	6.9024	6.9333	6.8937	6.9303	6.8981	6.9142	6.9268	6.8745	6.9537	6.8963	6.9376
pos_5129	8-iso Prostaglandin F1alpha	metab_5124	-	-	339.252	pos	M+H-H2O	C20H36O5	6.8339	0.0382639	65.9	-	-1.95825	-	-	-	-	-	-	-	-	-	-	5.033	5.7966	5.0842	5.2341	4.5895	5.7027	5.6303	5.6337	5.6952	5.6636	5.8922	5.9076	5.9142	5.8498	5.8333	6.0007	5.9864	6.0455	6.008	5.9958	5.9344	6.0387	6.1234	5.9579	6.0459	6.036
pos_5250	CP 47,497-C8-homolog C-8-hydroxy metabolite	metab_5245	-	-	349.273	pos	M+H	C22H36O3	6.7081	0.0390905	51.5	-	-1.18561	-	-	-	-	-	-	-	-	-	-	7.0348	6.959	6.9975	7.1007	6.6987	7.4652	7.417	7.3437	7.3584	7.3854	7.5669	7.6465	7.6224	7.5868	7.5978	7.744	7.691	7.7714	7.688	7.7371	7.6207	7.6106	7.7369	7.7314	7.6796	7.6509
pos_5383	(E)-5,8-Megastigmadien-4-one	metab_5378	-	HMDB0034671	210.185	pos	M+NH4	C13H20O	6.5827	0.0613889	-	76.8	-0.338471	67401-26-7	-	-	-	-	-	-	Organic oxygen compounds	Organooxygen compounds	Carbonyl compounds	5.0778	5.1165	5.065	5.1079	5.1891	5.0976	4.946	5.2256	5.1346	5.0462	5.1105	5.0475	5.1855	5.2182	5.1894	5.1646	5.1816	5.0862	5.1502	5.0049	5.1388	5.1763	5.1274	5.1056	5.1349	4.983
pos_5393	Sagittariol	metab_5388	-	HMDB0036835	339.289	pos	M+CH3OH+H	C20H34O2	6.5757	0.0490299	-	53.6	-1.00316	56497-92-8	-	-	-	-	-	-	Lipids and lipid-like molecules	Prenol lipids	Diterpenoids	6.3851	6.3662	6.3709	6.414	6.4245	6.446	6.455	6.397	6.4494	6.4091	6.4798	6.445	6.4404	6.4458	6.4278	6.4945	6.4393	6.4985	6.4551	6.4673	6.4706	6.4697	6.4754	6.4534	6.5251	6.5355
pos_5409	Palmitoleamide	metab_5404	-	LMFA08010010	254.248	pos	M+H	C16H31NO	6.5547	0.0777255	67.1	-	-0.986562	-	-	-	-	-	-	-	-	-	-	6.7324	6.7617	6.6569	6.7439	6.7853	6.7407	6.5647	6.8194	6.7559	6.7234	6.7239	6.601	6.7875	6.7557	6.7765	6.7403	6.7815	6.6735	6.7327	6.6197	6.7011	6.7631	6.7035	6.7177	6.7557	6.5477
pos_5432	Erythro-6,8-Pentacosanediol	metab_5427	-	HMDB0041075	423.361	pos	M+K	C25H52O2	6.5337	0.0752252	-	70.6	3.12655	155800-84-3	-	-	-	-	-	-	Lipids and lipid-like molecules	Fatty Acyls	Fatty alcohols	3.6455	4.4974	5.138	3.6387	5.6848	4.5703	4.6091	4.6486	4.8961	4.6248	4.9078	5.0382	4.9488	4.835	5.4771	5.5777	5.1651	5.2736	5.1838	5.3664	5.2807	5.2302	5.3087	5.233	5.0187	5.0731
pos_5451	Tsugaric acid A 21-glucosyl ester	metab_5446	-	HMDB0033425	625.407	pos	M+H-2H2O	C38H60O9	6.5057	0.0292735	-	55.5	-3.77698	205119-13-7	-	-	-	-	-	-	Lipids and lipid-like molecules	Prenol lipids	Triterpenoids	5.8291	5.8053	6.1171	5.7901	5.3761	6.1954	6.0352	5.9723	6.5227	6.4613	6.253	6.3758	6.0979	6.1341	6.1064	5.7317	6.0104	5.9309	5.8063	5.671	5.5204	4.9373	5.2921	5.01	4.7473	4.5571
pos_5505	17,20-dimethyl Prostaglandin F1alpha	metab_5500	-	-	367.284	pos	M+H-H2O	C22H40O5	6.4427	0.0422124	57.8	-	-0.82547	-	-	-	-	-	-	-	-	-	-	6.1043	6.0139	6.0704	6.1412	5.8215	6.5588	6.5728	6.4566	6.4559	6.4918	6.6616	6.7766	6.6789	6.7342	6.6836	6.8829	6.8136	6.8842	6.8377	6.7682	6.7828	6.7449	6.8669	6.905	6.7703	6.9102
pos_5516	N-palmitoyl glutamic acid	metab_5511	-	LMFA08020087	386.29	pos	M+H	C21H39NO5	6.4287	0.0233517	72	-	-1.31563	-	-	-	-	-	-	-	-	-	-	5.0376	5.094	5.0394	4.976	5.126	5.6884	5.8902	5.6182	5.7959	5.7045	5.7763	5.7419	5.7155	5.8329	5.5977	5.7516	5.609	5.8112	5.859	5.4792	4.9692	4.8376	5.2448	5.0581	4.9051	4.8513
pos_5523	PC(18:3/0:0)	metab_5518	-	HMDB0010388;LMGP01050038	518.324	pos	M+H	C26H48NO7P	6.4217	0.127223	81	-	-0.0745314	-	-	-	-	-	-	-	Lipids and lipid-like molecules	Glycerophospholipids	Glycerophosphocholines	6.1866	6.34	6.5063	6.3226	5.9047	5.2462	5.2496	5.3877	5.3719	5.5276	5.4554	5.0352	5.6884	5.5954	5.0445	5.1122	5.3234	5.223	5.2582	5.2746	4.896	4.9541	5.0372	5.235	5.6777	4.7562
pos_5548	Oleoyl dopamine	metab_5543	-	-	418.331	pos	M+H	C26H43NO3	6.3937	0.0360102	62.5	-	-1.32554	-	-	-	-	-	-	-	-	-	-	5.1263	5.3999	5.1907	5.1868	5.6624	5.7923	6.0007	5.7425	5.6965	5.6704	5.7627	5.8686	5.7625	5.8378	5.8357	5.9636	6.0033	6.0166	6.0356	5.9182	5.9747	6.072	6.0441	6.0371	5.9594	5.8768
pos_5567	9,12-Octadecadiynoic Acid	metab_5562	-	LMFA01030540	277.216	pos	M+H	C18H28O2	6.3798	0.0264696	70.5	-	-0.832851	-	-	-	-	-	-	-	-	-	-	7.196	7.2772	7.2229	7.3695	7.1111	7.6838	7.7263	7.67	7.8276	7.8011	7.6476	7.6187	7.6775	7.5981	7.6049	7.6139	7.6751	7.689	7.6137	7.6064	7.5678	7.6377	7.7332	7.5242	7.567	7.5089
pos_5571	Phytocassane D	metab_5566	-	HMDB0041057	633.415	pos	2M+H	C20H28O3	6.3728	0.0782152	-	69.3	-0.674577	166547-24-6	-	-	-	-	-	-	Lipids and lipid-like molecules	Prenol lipids	Diterpenoids	5.78	5.8238	5.6303	5.9225	5.2952	5.7675	5.408	5.397	5.9813	5.7271	6.1401	6.2725	5.8571	5.9109	6.0157	6.0201	6.1596	6.2762	6.2282	6.1294	6.0855	6.2681	6.153	6.3734	6.1469	6.6565
pos_5573	(13R,14R)-8-Labdene-13,14,15-triol	metab_5568	-	HMDB0034957	366.3	pos	M+ACN+H	C20H36O3	6.3728	0.0707078	-	53	-1.2863	-	-	-	-	-	-	-	Lipids and lipid-like molecules	Prenol lipids	Diterpenoids	3.5269	4.053	4.2458	3.5305	4.2656	6.0032	5.5078	5.5839	5.4006	5.228	5.161	5.2682	5.2498	5.3369	5.3628	5.2773	5.2453	5.3559	5.3826	5.1631	5.4322	5.4959	5.5803	5.4553	5.4834	5.3428
pos_5593	2-Undecen-1-ol	metab_5588	-	LMFA05000622;HMDB0034856	358.368	pos	2M+NH4	C11H22O	6.3589	0.0317586	-	59.3	-1.33753	37617-03-1	-	-	-	-	-	-	Lipids and lipid-like molecules	Fatty Acyls	Fatty alcohols	5.8641	5.6885	5.7205	5.8354	5.7708	5.9756	6.0934	5.9193	5.9186	5.8492	5.7664	5.9933	5.991	5.9153	6.0451	5.9248	6.1533	5.9106	6.065	5.9933	6.1016	5.9794	6.0148	5.9727	5.9053	6.2294
pos_5604	Physagulin B	metab_5599	-	HMDB0041048	585.198	pos	M+K	C30H39ClO7	6.3379	0.120128	-	88.1	-6.82311	146713-97-5	-	-	-	-	-	-	Lipids and lipid-like molecules	Steroids and steroid derivatives	Steroid lactones	3.6584	3.7	3.6904	3.6621	3.6641	6.004	5.8413	5.6545	6.5579	6.128	5.9829	5.8747	5.7621	5.4364	5.8107	5.2489	5.5171	5.4526	5.3594	5.4848	5.2104	5.1127	5.1922	4.884	5.2321	4.9888
pos_5625	12-OPDA	metab_5620	C01226	-	293.211	pos	M+H	C18H28O3	6.3239	0.0226515	95.1	-	-1.29875	-	-	-	map01100;map00592;map01110	Metabolic pathways; alpha-Linolenic acid metabolism; Biosynthesis of secondary metabolites	Metabolism;Metabolism;Metabolism	Global and overview maps;Lipid metabolism;Global and overview maps	-	-	-	7.6002	7.6673	7.6329	7.7491	7.5529	7.7634	7.7879	7.7906	7.8575	7.8417	7.7593	7.7615	7.7171	7.7091	7.6683	7.6303	7.6807	7.7064	7.6546	7.6247	7.5589	7.631	7.6833	7.5974	7.5799	7.6066
pos_5636	Tetranor-12(S)-HETE	metab_5631	-	-	249.185	pos	M+H-H2O	C16H26O3	6.3099	0.0779536	56.6	-	-0.979219	-	-	-	-	-	-	-	-	-	-	5.1971	5.2398	5.2133	5.2778	5.1189	5.164	5.1294	5.0961	5.2074	5.1898	5.234	5.2351	5.2324	5.2013	5.2726	5.3292	5.2916	5.3863	5.2819	5.3885	5.5103	5.4784	5.5331	5.4671	5.5938	5.5899
pos_5655	Cinnamyl alcohol	metab_5650	C02394	HMDB0029698;HMDB0029697	117.07	pos	M+H-H2O	C9H10O	6.2961	0.0252521	-	59.9	1.20242	4407-36-7;104-54-1	-	-	map01110;map01060	Biosynthesis of secondary metabolites; Biosynthesis of plant secondary metabolites	Metabolism;Metabolism	Global and overview maps;Chemical structure transformation maps	Phenylpropanoids and polyketides	Cinnamyl alcohols	Not Available	5.2918	5.425	5.2699	5.3286	5.1563	5.3313	5.3596	5.3105	5.4445	5.3956	5.3311	5.3079	5.3311	5.3016	5.3516	5.2892	5.3122	5.2782	5.2822	5.2989	5.2816	5.2932	5.3166	5.2568	5.2592	5.2136
pos_5660	Xi-4-Hydroxy-4-methyl-2-cyclohexen-1-one	metab_5655	-	HMDB0033629	91.0546	pos	M+H-2H2O	C7H10O2	6.2891	0.0212866	-	59.7	3.252	-	-	-	-	-	-	-	Organic oxygen compounds	Organooxygen compounds	Carbonyl compounds	6.0774	6.1585	6.0529	6.073	5.9961	6.114	6.149	6.1073	6.2019	6.1505	6.1537	6.1178	6.1306	6.1182	6.1519	6.1288	6.125	6.128	6.1316	6.124	6.1296	6.1351	6.1513	6.1048	6.1217	6.0981
pos_5668	2,5-Dimethylbenzaldehyde	metab_5663	-	HMDB0032014	135.08	pos	M+H	C9H10O	6.2822	0.0267591	90.1	-	-0.303092	-	-	-	-	-	-	-	Benzenoids	Benzene and substituted derivatives	Benzoyl derivatives	5.928	5.9788	5.9283	5.975	5.8987	5.9385	5.9515	5.9414	5.9865	5.9114	5.9489	5.9196	5.8978	5.9144	5.9564	5.9165	5.9098	5.8817	5.9517	5.9639	5.9797	5.8783	5.866	5.915	5.9059	5.8853
pos_5700	9S-hydroxy-12R,13S-epoxy-10E,15Z-octadecadienoic acid	metab_5695	-	LMFA02000020	311.221	pos	M+H	C18H30O4	6.2472	0.0178853	65.1	-	-1.22847	-	-	-	-	-	-	-	-	-	-	7.0119	6.9969	7.0129	7.0827	7.026	7.0437	7.0803	7.0676	7.0848	7.1144	7.008	6.9521	6.9518	6.9541	6.8906	6.7995	6.8003	6.8332	6.7958	6.7698	6.7372	6.8134	6.8349	6.747	6.783	6.7387
pos_5701	Polyoxyethylene 40 monostearate	metab_5696	-	HMDB0032477	346.331	pos	M+NH4	C20H40O3	6.2472	0.0409802	-	56.9	-1.13206	9004-99-3	-	-	-	-	-	-	Lipids and lipid-like molecules	Fatty Acyls	Fatty acid esters	5.2843	5.327	5.3894	5.3712	5.4427	5.2795	5.388	5.3613	5.2141	5.3364	5.3128	5.4281	5.2852	5.2169	5.6073	5.3476	5.4353	5.2343	5.2983	5.7679	5.3526	5.2239	5.1722	5.3222	5.2774	5.5496
pos_5725	Pinolenic Acid	metab_5720	-	LMFA01030344	279.232	pos	M+H	C18H30O2	6.2263	0.017852	65.4	-	-1.18597	-	-	-	-	-	-	-	-	-	-	6.1775	6.1837	6.2052	6.402	6.2477	6.7246	6.7194	6.6819	6.7429	6.6974	6.8483	6.8741	6.9019	6.8893	6.8617	7.0526	7.0212	7.0395	7.0579	7.005	7.0384	7.1155	7.1412	7.0599	7.0846	7.1901
pos_5729	Melleolide	metab_5724	-	HMDB0035689	418.221	pos	M+NH4	C23H28O6	6.2193	0.0296333	-	74.3	-3.45976	82869-08-7	-	-	-	-	-	-	Lipids and lipid-like molecules	Prenol lipids	Sesquiterpenoids	5.6514	5.599	5.7549	5.7442	5.8049	5.6673	5.6143	5.7081	5.6333	5.5459	5.6957	5.6399	5.596	5.6736	5.7257	5.7129	5.6933	5.564	5.7354	5.6882	5.7205	5.6265	5.5105	5.7103	5.6653	5.6333
pos_5733	2,6-Dimethylnaphthalene	metab_5728	C14330	HMDB0059764	157.101	pos	M+H	C12H12	6.2193	0.0330858	84.8	-	-0.291707	-	-	-	-	-	-	-	Benzenoids	Naphthalenes	Not Available	5.5296	5.9113	5.5392	5.4892	5.3219	5.4942	5.5357	5.4626	5.6555	5.5428	5.5173	5.5275	5.5106	5.4857	5.6269	5.5246	5.5037	5.4898	5.4964	5.5231	5.5499	5.6004	5.537	5.5043	5.4982	5.5087
pos_5744	4-Phenyl-3-buten-2-ol	metab_5739	-	HMDB0031616	131.086	pos	M+H-H2O	C10H12O	6.2124	0.016942	-	55.8	0.170099	17488-65-2	-	-	-	-	-	-	Phenylpropanoids and polyketides	Cinnamyl alcohols	Not Available	5.3935	5.6352	5.3732	5.356	5.2399	5.442	5.5129	5.4269	5.5291	5.5021	5.4714	5.405	5.44	5.4222	5.4318	5.3761	5.4073	5.4008	5.397	5.3713	5.3985	5.4183	5.4453	5.3747	5.4005	5.3593
pos_5753	MG(15:0/0:0/0:0)	metab_5748	-	HMDB0011563	334.295	pos	M+NH4	C18H36O4	6.1985	0.123311	-	75.4	-1.36391	-	-	-	-	-	-	-	Lipids and lipid-like molecules	Glycerolipids	Monoradylglycerols	4.8613	5.0337	5.0469	5.0585	4.8487	4.7618	4.8299	4.7591	4.5439	4.7883	4.8646	4.9394	4.7044	4.6541	5.1808	5.2932	5.2349	5.1845	5.3758	5.4922	5.3366	5.3568	5.3069	5.4065	5.3137	5.5801
pos_5762	C16 Sphingosine	metab_5757	-	LMSP01040008	272.258	pos	M+H	C16H33NO2	6.1915	0.168812	78.4	-	-1.15885	-	-	-	-	-	-	-	-	-	-	5.2804	5.0388	5.2405	5.1789	5.4287	5.25	5.2048	5.2693	5.013	5.2238	5.1338	5.2336	5.2192	5.1508	5.309	5.2578	5.2429	5.1468	5.3096	5.3349	5.208	5.236	5.102	5.2602	5.1782	5.3365
pos_5773	Canarigenin 3-[glucosyl-(1->4)-6-deoxy-alloside]	metab_5768	-	HMDB0035433	725.316	pos	M+2Na-H	C35H52O13	6.1777	0.0361181	-	66	6.02477	229319-08-8	-	-	-	-	-	-	Lipids and lipid-like molecules	Steroids and steroid derivatives	Steroidal glycosides	6.244	6.2995	6.6196	6.2756	5.8916	5.5207	5.6989	5.9262	5.7542	5.8811	6.17	6.0835	5.8918	5.8562	5.8778	5.621	5.687	5.8678	5.7091	5.6026	5.3884	5.3103	5.4177	5.4566	5.2739	5.5769
pos_5807	2,3-dinor-PGE1	metab_5802	-	LMFA03010169	327.216	pos	M+H	C18H30O5	6.1567	0.0277989	51.1	-	-1.58437	-	-	-	-	-	-	-	-	-	-	6.1375	6.155	6.2038	6.232	6.1764	6.3369	6.4056	6.2909	6.3945	6.3895	6.274	6.2119	6.2367	6.224	6.1806	6.1149	6.1382	6.1431	6.1283	6.0782	6.063	6.1047	6.1769	6.0843	6.0906	6.0818
pos_5808	2-Phenylaminoadenosine	metab_5803	-	HMDB0001069	323.127	pos	M+H-2H2O	C16H18N6O4	6.1567	0.240671	-	69.6	6.49204	53296-10-9	-	-	-	-	-	-	Nucleosides, nucleotides, and analogues	Purine nucleosides	Not Available	3.3009	3.6768	5.131	3.5396	5.1959	5.4709	4.6974	5.7299	3.395	3.616	3.4237	3.4033	5.262	4.0027	3.405	3.4244	3.9011	4.0732	4.6493	3.4153	5.4528	4.5537	3.4281	3.4103	4.2261	3.4056
pos_5833	Isoalantolactone	metab_5828	C09484	HMDB0035934	233.153	pos	M+H	C15H20O2	6.1357	0.0186071	60.8	-	-0.688137	470-17-7	-	-	-	-	-	-	Lipids and lipid-like molecules	Prenol lipids	Terpene lactones	5.8854	6.1538	5.9302	5.9136	5.6949	6.0589	6.2185	5.9481	6.2343	6.1193	5.9691	5.941	5.9745	5.9038	5.9229	5.8009	5.8598	5.8499	5.8345	5.8246	5.8212	5.8452	5.9441	5.844	5.836	5.8314
pos_5877	[(16R)-5,11-dihydroxy-8,8,10,16-tetramethyl-3-[1-(2-methyl-1,3-thiazol-4-yl)prop-1-en-2-yl]-12-methylidene-9-oxo-17-oxa-4-azabicyclo[14.1.0]heptadec-4-en-7-yl]oxidanesulfonic acid	metab_5872	-	HMDB0127606	549.212	pos	M+H-2H2O	C27H40N2O8S2	6.0867	0.286295	-	69.6	5.24839	-	-	-	-	-	-	-	Organoheterocyclic compounds	Azoles	Thiazoles	3.2808	3.3224	4.9629	3.2844	4.0145	5.7627	3.8116	5.8422	3.375	3.3719	3.4036	3.3832	5.3006	3.3999	3.3849	3.4044	3.9217	3.7656	4.53	3.3952	5.5376	4.4777	3.8102	3.3903	3.5415	3.3855
pos_5880	Arachidonyl Trifluoromethyl Ketone	metab_5875	-	-	357.242	pos	M+H	C21H31F3O	6.0867	0.150062	50.2	-	5.66673	-	-	-	-	-	-	-	-	-	-	3.7837	5.5904	4.1352	4.3746	4.1262	2.295	2.0861	3.3774	3.8297	2.4918	3.7603	3.4318	2.4831	3.7022	3.4327	4.0275	2.6273	3.5791	3.5605	2.7602	2.6689	3.8385	1.5136	3.3548	3.8429	1.4918
pos_5895	3-Hydroxy-beta-ionone	metab_5890	-	HMDB0036821	209.154	pos	M+H	C13H20O2	6.0727	0.0324321	78.9	-	-0.404817	50281-38-4	-	-	-	-	-	-	Lipids and lipid-like molecules	Prenol lipids	Sesquiterpenoids	5.4822	5.6433	5.486	5.5951	5.4038	6.1389	6.1866	6.2247	6.2122	6.1861	6.3496	6.3018	6.3492	6.3272	6.3438	6.3501	6.3302	6.3804	6.3425	6.3603	6.2069	6.276	6.3491	6.2265	6.2626	6.2555
pos_5908	7-Tridecynoic acid	metab_5903	-	LMFA01030600	211.169	pos	M+H	C13H22O2	6.0587	0.0167384	57	-	-0.54487	-	-	-	-	-	-	-	-	-	-	4.6414	4.7075	4.6608	4.7649	4.5226	5.1919	5.3512	5.3854	5.703	5.3514	5.5187	5.5877	5.7124	5.6836	5.7659	6.0454	6.0117	6.1729	6.0821	6.033	6.0213	6.2239	6.1615	6.0854	6.1149	6.1244
pos_5951	Glyceryl 5-hydroxydecanoate	metab_5946	-	HMDB0032297	285.169	pos	M+Na	C13H26O5	6.0027	0.0897999	-	55.8	7.92777	26446-31-1	-	-	-	-	-	-	Lipids and lipid-like molecules	Fatty Acyls	Fatty alcohols	6.0817	6.1276	6.0685	6.2588	5.7869	4.4345	4.2762	4.1814	4.3301	4.5218	4.1393	4.2941	4.3271	4.3978	4.2071	4.5415	4.167	4.5071	4.4122	4.2323	4.4331	4.347	4.3661	4.3317	4.3678	4.3739
pos_5963	Kuwanon Q	metab_5958	-	HMDB0030113	645.252	pos	M+H-H2O	C40H38O9	5.9747	0.0180343	-	64.3	5.46378	89803-86-1	-	-	-	-	-	-	Phenylpropanoids and polyketides	Diarylheptanoids	Linear diarylheptanoids	5.3791	5.8452	5.8267	5.6813	5.5662	5.576	5.6624	5.8027	5.7017	5.9153	6.0455	5.57	5.8298	5.7095	5.7269	5.7318	5.4909	5.5444	5.6586	5.6603	5.0608	5.0616	5.4897	5.1186	5.4095	4.8273
pos_5965	P-Mentha-1,3,5,8-tetraene	metab_5960	-	HMDB0029641	133.101	pos	M+H	C10H12	5.9747	0.0286607	75.1	-	0.0937952	1195-32-0	-	-	-	-	-	-	Benzenoids	Benzene and substituted derivatives	Phenylpropenes	5.7259	5.8854	5.7544	5.7499	5.5827	6.1363	6.2039	6.197	6.1932	6.2104	6.3579	6.2417	6.3545	6.3585	6.3137	6.2953	6.2847	6.3055	6.2808	6.3133	6.0413	6.0994	6.2024	6.105	6.094	5.9012
pos_5992	4,4'-dihydroxybibenzyl	metab_5987	C14341	LMPK13090042	215.107	pos	M+H	C14H14O2	5.8977	0.0609663	58.3	-	-0.366826	-	-	-	-	-	-	-	-	-	-	5.4159	5.3571	5.3066	5.3893	5.172	5.0159	5.1954	5.0339	4.9399	5.0308	5.2889	5.2211	5.2382	5.3022	5.2388	5.3681	5.2925	5.3271	5.2994	5.3277	5.2905	5.3205	5.2929	5.3111	5.2991	5.2966
pos_5996	Benzenemethanol, 2-(2-hydroxypropoxy)-3-methyl-	metab_5991	-	-	197.117	pos	M+H	C11H16O3	5.8907	0.043177	67.1	-	-0.311165	-	-	-	-	-	-	-	-	-	-	5.6816	5.85	5.7014	5.741	5.6004	6.269	6.2791	6.2563	6.3796	6.2918	6.321	6.2641	6.2695	6.2674	6.2344	6.1392	6.1883	6.1663	6.1566	6.165	6.3884	6.3496	6.43	6.3196	6.4105	6.2153
pos_6012	Zearalenone 4-sulfate	metab_6007	-	HMDB0033623	416.134	pos	M+NH4	C18H22O8S	5.8417	0.0378359	-	71.7	-9.37014	132505-04-5	-	-	-	-	-	-	Phenylpropanoids and polyketides	Macrolides and analogues	Zearalenones	3.0954	2.9965	3.9409	2.9056	3.1222	5.175	5.0824	5.5657	4.9354	4.9221	5.0831	5.0472	5.4211	5.272	5.263	5.4535	5.2964	5.2938	5.5971	5.1306	5.3708	5.261	5.2602	5.2382	5.04	5.7437
pos_6026	[(16R)-5,7-dihydroxy-8,8,12,16-tetramethyl-3-[1-(2-methyl-1,3-thiazol-4-yl)prop-1-en-2-yl]-10-methylidene-9-oxo-17-oxa-4-azabicyclo[14.1.0]heptadec-4-en-11-yl]oxidanesulfonic acid	metab_6021	-	HMDB0127601	607.215	pos	M+Na	C27H40N2O8S2	5.8137	0.0603223	-	75.3	4.80732	-	-	-	-	-	-	-	Organoheterocyclic compounds	Azoles	Thiazoles	3.8153	2.7089	4.4413	2.671	2.6731	5.8352	5.6859	6.1901	5.1723	5.3896	5.6637	5.5806	5.9001	5.678	5.6593	5.8045	5.743	5.7939	5.7439	5.7017	6.0554	5.7507	5.7145	5.3591	5.6098	4.8494
pos_6033	Alpha-Santonin	metab_6028	C02206	LMPR0103190001	247.132	pos	M+H	C15H18O3	5.7787	0.0490424	82.8	-	-1.8968	-	-	-	-	-	-	-	-	-	-	6.9565	6.4201	6.6077	5.5552	5.6302	5.7087	5.7356	5.6421	6.6058	5.6925	5.5643	5.5482	5.853	5.6197	5.636	5.4893	5.5005	5.4603	5.4809	5.6135	5.3438	6.3551	5.522	5.3515	5.383	5.3683
pos_6037	3-Hydroxyquinaldic acid	metab_6032	C18621	-	190.05	pos	M+H	C10H7NO3	5.7717	0.0439218	71.9	-	-0.713487	-	-	-	-	-	-	-	-	-	-	4.2431	4.3221	4.1065	4.3242	4.3126	4.3505	4.3546	4.3394	4.3383	4.3539	4.3455	4.3853	4.3222	4.3252	4.3213	4.3763	4.3418	4.3767	4.3284	4.3888	4.8437	5.0106	4.7981	4.9978	4.7825	5.3466
pos_6043	Nicotyrine	metab_6038	C10161	-	159.092	pos	M+H	C10H10N2	5.7577	0.0549959	57.9	-	-0.267767	-	-	-	-	-	-	-	-	-	-	3.6076	3.5835	3.7399	3.9212	3.3175	3.2915	3.6794	3.638	3.2415	3.2298	4.3103	3.8752	4.1948	4.1542	4.2997	4.5993	4.5032	4.545	4.6346	4.6606	4.9005	4.8742	4.816	4.8318	4.6979	4.8072
pos_6065	Latanoprost Lactone Diol	metab_6060	-	-	305.174	pos	M+H	C18H24O4	5.6807	0.0534088	65.5	-	-1.14101	-	-	-	-	-	-	-	-	-	-	5.5857	5.7133	5.6383	5.6069	5.4751	5.4824	5.4339	5.3656	5.5835	5.4652	5.4796	5.412	5.3599	5.2981	5.3223	5.0691	5.1952	5.2018	5.1442	5.1368	4.7519	4.817	4.8751	4.7463	4.7465	4.813
pos_6093	1-Phenyl-2-pentanol	metab_6088	-	HMDB0031625	165.127	pos	M+H	C11H16O	5.5827	0.027025	59.7	-	-0.291591	705-73-7	-	-	-	-	-	-	Benzenoids	Benzene and substituted derivatives	Not Available	4.8992	5.0314	4.9856	5.0709	4.8003	5.1348	5.1631	5.1073	5.123	5.1874	5.266	5.1523	5.2541	5.2369	5.2216	5.2815	5.2923	5.2647	5.2688	5.2809	5.3379	5.3915	5.3885	5.339	5.359	5.3253
pos_6102	Xanthoxylol	metab_6097	-	HMDB0029459	357.133	pos	M+H	C20H20O6	5.5477	0.0419714	51.9	-	-1.44342	54983-95-8	-	-	-	-	-	-	Lignans, neolignans and related compounds	Furanoid lignans	Not Available	4.9398	5.0311	5.3381	4.9349	5.3181	5.8543	5.7128	6.0206	5.1926	5.4558	5.327	5.4267	5.5826	5.338	5.3154	5.3305	5.3898	5.4213	5.3739	5.3393	5.6052	5.4369	5.4147	5.2506	5.3766	5.083
pos_6106	12-hydroxy-3Z,6Z-dodecadienoic acid	metab_6101	-	LMFA01050171	213.148	pos	M+H	C12H20O3	5.5407	0.0309615	67.5	-	-0.656634	-	-	-	-	-	-	-	-	-	-	5.6443	5.5677	5.5973	5.6885	5.556	5.9809	5.9916	5.8536	5.9837	5.9398	5.8623	5.8358	5.8107	5.8115	5.7893	5.5637	5.5605	5.5586	5.5341	5.5537	5.9182	5.9618	5.9905	5.8919	6.1083	5.8679
pos_6170	5-NITRO-2-PHENYLPROPYLAMINOBENZOIC ACID [NPPB]	metab_6165	-	-	301.118	pos	M+H	C16H16N2O4	5.3377	0.0882663	52.8	-	-0.953219	-	-	-	-	-	-	-	-	-	-	4.781	4.8261	4.8665	5.1022	4.3889	4.5607	4.4013	4.7182	4.5841	4.6989	5.067	4.8745	4.9825	5.0747	5.1406	5.2382	5.0983	5.2345	5.1119	5.2233	5.1847	5.2998	5.3542	5.309	5.3057	5.2521
pos_6171	Helinorbisabone	metab_6166	-	HMDB0032116	251.127	pos	M+H	C14H18O4	5.3377	0.0287699	55.1	-	-1.87198	201288-95-1	-	-	-	-	-	-	Lipids and lipid-like molecules	Prenol lipids	Monoterpenoids	5.7554	5.8172	5.7606	5.8822	5.5875	5.2615	5.1587	5.2699	5.1357	5.1945	5.1779	5.1875	5.1394	5.1577	5.1906	4.9901	5.0036	4.9567	4.9047	4.9842	4.851	4.8911	4.9303	4.8534	4.9816	4.859
pos_6180	Asp-Lys-OH	metab_6175	-	-	370.128	pos	M+H	C15H19N3O8	5.2957	0.0324016	59	-	9.3358	-	-	-	-	-	-	-	-	-	-	4.0827	4.7529	5.2531	4.3362	4.3219	5.3891	5.3178	5.5798	5.2726	5.1759	5.343	5.5275	5.6414	5.5862	5.5555	5.759	5.6147	5.8368	6.0633	5.4467	5.7892	5.6461	5.9488	5.6907	5.5474	6.0277
pos_6191	1,2-Bis(4-hydroxyphenyl)-2-propanol	metab_6186	C13629	-	245.117	pos	M+H	C15H16O3	5.2536	0.0576892	54.8	-	-0.526283	-	-	-	map00363;map01100;map01120	Bisphenol degradation; Metabolic pathways; Microbial metabolism in diverse environments	Metabolism;Metabolism;Metabolism	Xenobiotics biodegradation and metabolism;Global and overview maps;Global and overview maps	-	-	-	5.1198	5.0865	5.0025	4.9704	4.9407	4.839	4.7671	4.6604	4.8704	4.6801	4.7425	4.5502	4.6788	4.7436	4.6414	4.5565	4.5095	4.4875	4.452	4.5881	4.3263	4.4702	4.4597	4.3313	4.3687	4.3625
pos_6199	Galactosyl 4-hydroxyproline	metab_6194	-	HMDB0029353	311.146	pos	M+NH4	C11H19NO8	5.2396	0.0274364	-	55.5	4.10006	79284-73-4	-	-	-	-	-	-	Alkaloids and derivatives	Rhoeadine alkaloids	Not Available	5.1846	5.2383	5.1635	5.2272	5.0409	6.2811	6.4895	6.2407	6.4426	6.4266	6.5255	6.4509	6.5508	6.5998	6.4991	6.6375	6.628	6.6496	6.5955	6.6579	6.7279	6.7439	6.7606	6.7036	6.7213	6.6817
pos_6200	Arginyl-Asparagine	metab_6195	-	HMDB0028704	306.191	pos	M+NH4	C10H20N6O4	5.2396	0.0336136	-	55.2	8.09736	-	-	-	-	-	-	-	Organic acids and derivatives	Carboxylic acids and derivatives	Amino acids, peptides, and analogues	3.0724	3.5541	3.1043	3.56	3.2992	5.302	5.4658	5.2256	5.4677	5.4114	5.4796	5.4092	5.4818	5.5325	5.4695	5.625	5.5941	5.632	5.5964	5.6337	5.7314	5.7313	5.7446	5.7159	5.6913	5.707
pos_6212	Oblongolide	metab_6207	C09519	-	221.154	pos	M+H	C14H20O2	5.1976	0.0337124	61.2	-	-0.467353	-	-	-	-	-	-	-	-	-	-	4.8229	4.9423	4.8909	4.8806	4.8858	4.8986	5.0242	4.9126	4.9776	5.0006	4.9965	4.9669	5.0485	5.0803	5.0002	5.0667	5.0631	5.0223	5.0398	5.0776	5.0792	5.1158	5.0869	5.0063	5.1121	5.1334
pos_6219	3,4,5-trihydroxy-6-({8-hydroxy-17-methoxy-10-oxo-2-oxatricyclo[13.2.2.1,]icosa-1(17),3,5,7(20),15,18-hexaen-4-yl}oxy)oxane-2-carboxylic acid	metab_6214	-	HMDB0133428	501.175	pos	M+H-H2O	C26H30O11	5.1556	0.0745477	-	62	-1.18743	-	-	-	-	-	-	-	Lignans, neolignans and related compounds	Lignan glycosides	Not Available	5.0597	5.8889	6.2318	5.4098	5.3648	5.237	5.1617	5.1758	5.3791	5.9313	5.7441	4.9293	5.8123	5.2534	5.4731	5.1652	5.5057	5.0198	5.3236	5.9974	5.1357	5.5702	5.0253	5.0179	6.0287	4.8663
pos_6264	Indole-3-ethanol	metab_6259	C00955	HMDB0003447	162.091	pos	M+H	C10H11NO	5.0436	0.0300104	84.8	-	-0.477549	-	-	-	map00380	Tryptophan metabolism	Metabolism	Amino acid metabolism	Organoheterocyclic compounds	Indoles and derivatives	Indoles	4.3395	4.416	4.4066	4.401	4.2586	4.7971	4.8019	5.0205	4.4619	4.6917	4.7454	4.5932	4.8533	4.7717	4.7184	4.7777	4.7718	4.7497	4.7695	4.7432	4.6808	4.5102	4.4899	4.4621	4.4691	4.4407
pos_6284	Norecasantalic acid	metab_6279	-	HMDB0036817	181.122	pos	M+H	C11H16O2	4.9736	0.0379091	72	-	-0.607837	59300-52-6	-	-	-	-	-	-	Lipids and lipid-like molecules	Prenol lipids	Monoterpenoids	5.0811	5.2186	5.1435	5.1639	5.0447	5.4712	5.4682	5.4362	5.5391	5.4827	5.5443	5.5787	5.5078	5.5049	5.4971	5.5211	5.5387	5.5613	5.5223	5.5156	5.5067	5.5537	5.5899	5.5044	5.5204	5.699
pos_6285	9-Hydroxy-7-megastigmen-3-one glucoside	metab_6280	-	HMDB0040701	395.204	pos	M+Na	C19H32O7	4.9596	0.0795409	-	57	-0.384459	-	-	-	-	-	-	-	Lipids and lipid-like molecules	Fatty Acyls	Fatty acyl glycosides	5.4149	5.4522	5.4157	5.5143	5.2902	3.2407	3.2457	3.1718	3.2683	3.7664	4.0084	3.2153	4.051	3.3352	3.5716	3.8412	3.9507	3.3295	3.2062	3.5673	3.2063	3.9944	3.8336	3.7955	3.8683	3.8939
pos_6306	Peonidin 3-O-glucoside	metab_6301	C12141	HMDB0013689	463.123	pos	M+H	C22H22O11	4.8959	0.03144	83.2	-	-0.806047	-	-	-	map00942	Anthocyanin biosynthesis	Metabolism	Biosynthesis of other secondary metabolites	Phenylpropanoids and polyketides	Flavonoids	Flavonoid glycosides	6.3107	6.1166	6.0639	6.2529	6.1939	5.9094	5.8263	5.8767	5.8148	5.7669	5.7855	5.7133	5.6777	5.7245	5.6073	5.859	5.6944	5.7779	5.8543	5.6741	5.7347	5.739	5.7091	5.7393	5.6161	5.6171
pos_6314	RHOIFOLIN	metab_6309	C12627	HMDB0038848	579.171	pos	M+H	C27H30O14	4.8819	0.0483746	68.8	-	-0.317381	17306-46-6	-	-	map00944	Flavone and flavonol biosynthesis	Metabolism	Biosynthesis of other secondary metabolites	Phenylpropanoids and polyketides	Flavonoids	Flavonoid glycosides	6.3566	6.1309	6.1647	6.2638	6.0758	5.7318	5.7574	5.7707	5.8774	5.7966	5.8786	5.806	5.6989	5.7871	5.7918	5.9047	5.8208	5.7998	5.7647	5.9008	5.7651	5.7164	5.6945	5.6311	5.6341	5.6336
pos_6317	N-(2-Phenylethyl)-acetamide	metab_6312	C06746	-	164.107	pos	M+H	C10H13NO	4.8749	0.0445776	77.5	-	-0.271323	-	-	-	-	-	-	-	-	-	-	3.4197	3.8631	3.1757	3.5447	3.1694	5.1165	5.1707	5.0287	5.154	5.1139	5.3733	5.6062	5.4862	5.4351	5.4798	5.6865	5.7344	5.7106	5.7079	5.6387	5.777	5.7523	5.8677	5.7744	5.8001	5.3014
pos_6318	Miraxanthin-V	metab_6313	C08557	-	347.123	pos	M+H	C17H18N2O6	4.8679	0.0205323	55.4	-	-1.26387	-	-	-	map01110;map00965	Biosynthesis of secondary metabolites; Betalain biosynthesis	Metabolism;Metabolism	Global and overview maps;Biosynthesis of other secondary metabolites	-	-	-	5.9528	6.0005	5.9434	6.0523	5.7008	5.2866	5.4343	5.3964	5.1043	5.3693	5.4846	5.419	5.4556	5.4698	5.4175	5.5214	5.4604	5.4273	5.4889	5.5367	5.4076	5.186	5.1405	5.1341	5.0816	5.0016
pos_6320	3-Hydroxyphenyl-valeric acid	metab_6315	-	HMDB0041666	195.102	pos	M+H	C11H14O3	4.8609	0.0477833	58.2	-	-0.193872	-	-	-	-	-	-	-	Lipids and lipid-like molecules	Fatty Acyls	Fatty acids and conjugates	4.9061	5.1413	4.9782	4.9846	4.947	5.0174	5.0454	4.9772	5.0774	5.0286	5.0355	5.1783	5.0578	4.975	5.071	4.9299	4.9892	4.9707	4.9448	5.0235	4.9168	5.0436	4.9908	5.07	4.9156	5.0026
pos_6374	10E,12E-tetradecadiene-4,6-diynoic acid	metab_6369	-	LMFA01030583	217.122	pos	M+H	C14H16O2	4.7133	0.0237821	63.7	-	-0.577814	-	-	-	-	-	-	-	-	-	-	5.7195	5.8197	5.7652	5.9218	5.6298	5.4506	5.3329	5.3927	5.3345	5.413	5.2338	5.2395	5.2422	5.214	5.2501	5.0371	5.0622	5.0353	5.0079	5.0319	4.9158	4.9136	5.0244	4.9493	5.0495	4.897
pos_6378	2E,4E,8Z,10E-dodecatetraenoic acid	metab_6373	-	LMFA01030240	193.122	pos	M+H	C12H16O2	4.7062	0.0487816	57.7	-	-0.137096	-	-	-	-	-	-	-	-	-	-	5.4992	5.6021	5.4953	5.6452	5.3819	5.255	5.2626	5.2296	5.3051	5.3534	5.209	5.2098	5.2086	5.1966	5.2162	5.1145	5.127	5.1152	5.1078	5.0902	5.0197	5.073	5.1354	5.0827	5.116	5.0439
pos_6398	Procurcumadiol	metab_6393	-	HMDB0034721	292.19	pos	M+ACN+H	C15H22O3	4.6566	0.0394778	-	58.6	-1.28809	129673-90-1	-	-	-	-	-	-	Lipids and lipid-like molecules	Prenol lipids	Sesquiterpenoids	4.5789	4.653	4.5531	4.5782	4.365	5.2855	5.2967	5.1812	5.338	5.3662	5.3507	5.3789	5.3971	5.3772	5.3986	5.4215	5.41	5.4074	5.3951	5.4063	5.4038	5.4356	5.4969	5.4194	5.5035	5.3945
pos_6402	N-lactoyl-phenylalanine	metab_6397	-	HMDB0062175	238.107	pos	M+H	C12H15NO4	4.6496	0.0553175	93.2	-	-0.909524	-	-	-	-	-	-	-	Organic acids and derivatives	Carboxylic acids and derivatives	Amino acids, peptides, and analogues	2.9449	2.9865	2.9937	2.9486	2.9506	5.5912	5.5938	5.5373	5.5175	5.6832	5.1425	5.5808	5.2181	5.0613	5.3101	4.7062	4.7512	4.6903	4.6513	4.6841	4.7456	4.7528	4.8374	4.7602	4.8918	4.5571
pos_6419	8-Deoxylactucin	metab_6414	C09392	-	261.112	pos	M+H	C15H16O4	4.6076	0.116775	59.1	-	-0.976153	-	-	-	-	-	-	-	-	-	-	5.7199	5.1629	4.8218	3.8208	4.1069	3.5494	4.2327	3.3432	4.9631	3.904	3.4645	3.7782	4.0602	2.9526	3.7509	3.406	3.9479	3.3904	3.8081	3.6904	3.7658	3.7309	3.2859	2.5011	3.6106	3.3303
pos_6432	(3S,7E,9R)-4,7-Megastigmadiene-3,9-diol 9-[apiosyl-(1->6)-glucoside]	metab_6427	-	HMDB0029766	527.246	pos	M+Na	C24H40O11	4.5656	0.132582	-	68.6	0.0796159	-	-	-	-	-	-	-	Lipids and lipid-like molecules	Fatty Acyls	Fatty acyl glycosides	5.6172	5.6519	5.6522	5.7243	5.5733	4.6263	4.6344	4.6186	4.6396	4.6365	4.6683	4.6479	4.6663	4.6646	4.6496	4.669	4.6612	4.6635	4.6531	4.6599	4.6532	4.661	4.6727	4.6549	4.6615	4.6502
pos_6440	10-Formyldihydrofolate	metab_6435	C03204	HMDB0006485	472.16	pos	M+H	C20H21N7O7	4.5446	0.0992653	-	67.1	5.19469	-	-	-	-	-	-	-	Lipids and lipid-like molecules	Sphingolipids	Phosphosphingolipids	5.7014	5.7627	5.6766	5.791	5.6837	4.6658	4.8719	4.8929	4.3652	4.6341	4.9077	5.0926	4.8703	5.0364	4.8465	4.5641	4.6643	4.5798	4.6277	4.5782	4.0295	3.8071	4.341	4.1405	4.2891	3.9362
pos_6488	4'-Desmethylpapaverine glucuronide	metab_6483	-	-	502.171	pos	M+H	C25H27NO10	4.4179	0.0711627	51.7	-	0.335866	-	-	-	-	-	-	-	-	-	-	5.4786	5.4603	5.4382	5.5974	5.0679	5.3154	5.578	5.5671	5.2317	5.3834	5.3816	5.3335	5.4129	5.4112	5.405	5.2026	5.1942	5.2256	5.273	5.2247	5.0605	5.0744	5.2737	4.9317	4.9964	4.4941
pos_6492	1-Octen-3-yl glucoside	metab_6487	-	HMDB0032959	332.207	pos	M+ACN+H	C14H26O6	4.4039	0.0191703	-	81.8	-0.896673	209863-00-3	-	-	-	-	-	-	Lipids and lipid-like molecules	Fatty Acyls	Fatty acyl glycosides	5.6103	5.6861	5.4865	5.8233	5.4473	5.4835	5.4506	5.337	5.727	5.743	5.354	5.3793	5.3165	5.3545	5.3276	5.3136	5.3984	5.4255	5.3127	5.2432	5.2845	5.2092	5.2595	5.1867	5.1445	4.985
pos_6496	Echinone	metab_6491	C10338	-	345.133	pos	M+H	C19H20O6	4.3969	0.0284644	52.7	-	-1.42316	-	-	-	-	-	-	-	-	-	-	3.7995	3.627	3.8323	2.2962	3.2377	3.9252	3.9752	4.52	2.3863	2.3833	4.6403	4.4003	4.974	4.8895	4.9165	5.4041	5.4058	5.3477	5.4328	5.3371	5.5502	5.6424	5.6673	5.6442	5.6073	5.3659
pos_6503	Scytalone	metab_6498	C00779	-	195.065	pos	M+H	C10H10O4	4.3899	0.0253632	89.4	-	-0.0444364	-	-	-	-	-	-	-	-	-	-	4.9281	4.8985	4.8146	4.8544	4.9393	4.2704	4.4193	4.2939	4.1422	4.1058	4.4878	4.4126	4.5804	4.6455	4.5329	4.53	4.4952	4.5828	4.4826	4.47	4.4629	4.5316	4.525	4.4709	4.4881	4.4559
pos_6570	Eremopetasinorone A	metab_6565	-	HMDB0029669	207.138	pos	M+H	C13H18O2	4.2359	0.0203103	58.9	-	-0.426473	182127-76-0	-	-	-	-	-	-	Organic oxygen compounds	Organooxygen compounds	Carbonyl compounds	6.3776	6.4465	6.3724	6.4976	6.2778	6.8824	6.8244	6.8758	6.8479	6.9132	6.9657	6.9002	6.9353	6.9447	6.9308	6.6961	6.73	6.7614	6.7087	6.6898	6.3166	6.3694	6.4632	6.3723	6.4644	6.1346
pos_6573	(S)-(-)-Perillyl alcohol	metab_6568	C02452	HMDB0003634	135.117	pos	M+H-H2O	C10H16O	4.2289	0.0308596	60.2	-	-0.128325	-	-	-	map01110;map00903;map00902	Biosynthesis of secondary metabolites; Limonene and pinene degradation; Monoterpenoid biosynthesis	Metabolism;Metabolism;Metabolism	Global and overview maps;Metabolism of terpenoids and polyketides;Metabolism of terpenoids and polyketides	Lipids and lipid-like molecules	Prenol lipids	Monoterpenoids	5.2484	5.3089	5.2418	5.3276	5.1546	5.5476	5.52	5.556	5.5389	5.604	5.6265	5.5561	5.5979	5.6029	5.5933	5.3866	5.4077	5.4311	5.3984	5.3895	5.1865	5.2383	5.2908	5.2151	5.2966	5.2079
pos_6584	Cis-Ferulic acid [arabinosyl-(1->3)-[glucosyl-(1->6)]-glucosyl] ester	metab_6579	-	HMDB0034682	326.112	pos	M+2H	C27H38O18	4.2079	0.0413049	-	50.9	5.03673	-	-	-	-	-	-	-	Organic oxygen compounds	Organooxygen compounds	Carbohydrates and carbohydrate conjugates	5.8532	5.9362	5.9022	6.0547	5.788	5.8755	5.875	5.8076	5.7271	5.8598	5.8535	5.8494	5.7614	5.809	5.7878	5.6339	5.6809	5.6242	5.652	5.6584	5.3368	5.4785	5.5698	5.5726	5.5767	5.4156
pos_6600	Methuyl tanshinonate	metab_6595	-	HMDB0036636	339.122	pos	M+H	C20H18O5	4.1589	0.0555155	53.9	-	-1.79646	18887-19-9	-	-	-	-	-	-	Lipids and lipid-like molecules	Prenol lipids	Diterpenoids	3.8345	5.2718	5.7623	4.497	4.9435	4.8878	4.9343	4.688	5.3744	5.4271	5.2345	3.0722	5.4608	5.3806	4.6633	4.8975	5.165	5.0429	5.3209	5.4172	4.0738	4.5454	4.5685	4.4844	5.5854	3.7719
pos_6613	3-Methyldioxyindole	metab_6608	C05834	HMDB0004186	164.071	pos	M+H	C9H9NO2	4.1239	0.0834876	60.5	-	-0.256453	3040-34-4	-	-	map00380	Tryptophan metabolism	Metabolism	Amino acid metabolism	Organoheterocyclic compounds	Indoles and derivatives	Indolines	5.1436	5.23	5.1753	5.3311	5.0877	4.6942	4.6635	4.646	4.6461	4.6953	4.5918	4.5719	4.5653	4.5848	4.5758	4.3555	4.2879	4.3756	4.322	4.3305	4.2867	4.194	4.3184	4.255	4.3356	4.3173
pos_6628	5-Methoxyindoleacetate	metab_6623	C05660	HMDB0004096	206.081	pos	M+H	C11H11NO3	4.0819	0.0167417	72.8	-	0.181075	3471-31-6	-	-	map00380	Tryptophan metabolism	Metabolism	Amino acid metabolism	Organoheterocyclic compounds	Indoles and derivatives	Indolyl carboxylic acids and derivatives	5.332	5.427	5.3564	5.4173	5.3543	5.2685	5.2792	5.0719	5.1918	5.137	5.3107	5.1728	5.3266	5.3792	5.3628	5.5563	5.495	5.5233	5.5129	5.5325	5.4365	5.4426	5.5947	5.4168	5.5948	5.4924
pos_6653	3-Coumaric Acid	metab_6648	C12621	HMDB0001713;MJDBOTE0001787	147.044	pos	M+H-H2O	C9H8O3	4.0329	0.0268885	73.3	-	-0.433382	-	-	-	map01100;map01220;map00360;map01120	Metabolic pathways; Degradation of aromatic compounds; Phenylalanine metabolism; Microbial metabolism in diverse environments	Metabolism;Metabolism;Metabolism;Metabolism	Global and overview maps;Global and overview maps;Amino acid metabolism;Global and overview maps	Phenylpropanoids and polyketides	Cinnamic acids and derivatives	Hydroxycinnamic acids and derivatives	6.1884	6.2418	6.297	6.2156	6.0878	5.7754	5.8433	5.8502	5.6942	5.823	5.8396	5.8474	5.8147	5.8587	5.797	5.6088	5.6479	5.6798	5.5965	5.6904	5.3046	5.2125	5.3357	5.213	5.4367	5.0722
pos_6666	3-O-Feruloylquinic acid	metab_6661	C02572	HMDB0030669	391.099	pos	M+Na	C17H20O9	3.9909	0.208595	-	83.1	-1.398	-	-	-	-	-	-	-	Organic oxygen compounds	Organooxygen compounds	Alcohols and polyols	5.765	5.2222	5.2749	5.1174	4.8961	3.9346	3.9652	3.9492	4.4591	3.7951	3.9382	3.16	3.721	4.0833	3.7021	3.6447	3.6644	0.2258	3.3076	0.2243	3.3852	0.2248	0.2295	0.2223	0.225	0.2204
pos_6720	Sambacin	metab_6715	-	HMDB0038883	573.252	pos	M+CH3OH+H	C26H36O12	3.8298	0.0725554	-	67.4	-4.58743	85562-86-3	-	-	-	-	-	-	Organic oxygen compounds	Organooxygen compounds	Carbohydrates and carbohydrate conjugates	6.6981	6.7461	6.7195	6.9148	6.5447	4.1483	3.5043	4.4315	4.4768	5.2295	4.3535	3.4964	4.8548	3.9802	3.5612	3.5176	4.148	3.512	3.5016	4.3006	3.6972	3.5095	3.5213	3.5035	4.4922	3.4987
pos_6758	L-4-Hydroxy-3-methoxy-a-methylphenylalanine	metab_6753	-	-	226.107	pos	M+H	C11H15NO4	3.7103	0.0729018	50.4	-	-0.822982	-	-	-	-	-	-	-	-	-	-	4.1616	3.9996	4.1843	4.4014	3.9285	4.9411	4.8453	4.8989	4.7863	4.8657	4.9993	4.9013	4.9319	4.9683	5.0543	4.9863	4.9478	4.9675	4.9118	5.0055	4.9053	4.8606	4.7717	4.9126	4.7375	4.8608
pos_6799	Yucalexin P17	metab_6793	-	HMDB0036752	382.233	pos	M+ACN+Na	C20H30O3	3.6123	0.17517	-	75.5	-6.24437	119642-82-9	-	-	-	-	-	-	Lipids and lipid-like molecules	Prenol lipids	Diterpenoids	3.4019	3.4435	3.4339	3.4056	3.4076	4.7103	4.8843	4.8411	5.0089	5.3961	4.4895	3.7221	4.1603	4.3447	3.9144	3.7729	3.8675	3.7311	3.9132	3.5164	3.5097	3.5175	3.5292	3.5114	3.518	3.5067
pos_6802	Artemidinol	metab_6796	-	HMDB0030647	217.086	pos	M+H	C13H12O3	3.6123	0.10807	58.1	-	-0.322162	62268-43-3	-	-	-	-	-	-	Phenylpropanoids and polyketides	Isocoumarins and derivatives	Not Available	5.2583	5.3384	5.3279	5.4355	5.2306	4.1742	3.6924	4.5544	3.301	3.9361	3.8797	2.9627	4.0198	3.7183	3.7221	3.7769	3.6554	3.9338	3.9664	3.5455	3.3104	3.3047	3.0404	3.1001	3.1101	3.1449
pos_6836	Ambonone	metab_6830	-	LMPK12050456	355.117	pos	M+H	C20H18O6	3.5418	0.097061	62.5	-	-1.46155	-	-	-	-	-	-	-	-	-	-	5.2244	5.3148	5.371	5.2429	5.5845	4.2914	4.046	4.7958	4.3049	4.3692	4.2308	4.064	4.6875	4.7611	4.2039	4.3569	4.2333	4.3321	4.2088	4.2032	3.6606	3.744	3.7839	3.3231	4.2582	2.2241
pos_6857	Glutamyltyrosine	metab_6851	-	HMDB0028831	293.116	pos	M+H-H2O	C14H18N2O6	3.4718	0.0631378	-	53.9	9.74162	3422-39-7	-	-	-	-	-	-	Organic acids and derivatives	Carboxylic acids and derivatives	Amino acids, peptides, and analogues	6.0738	5.9982	6.012	6.0985	6.1885	4.3617	4.6808	4.6271	4.7188	4.7521	4.3007	4.3757	4.4698	4.2622	4.0906	4.2418	4.5249	4.1297	4.2962	4.2948	4.2421	4.4361	4.3969	4.1771	4.6195	4.2121
pos_6917	6-Hydroxyindolelactate	metab_6911	C05657	-	222.076	pos	M+H	C11H11NO4	3.3101	0.0767262	57.2	-	-1.02702	-	-	-	-	-	-	-	-	-	-	1.4123	2.5125	2.0989	3.0348	3.4173	4.4706	4.3717	4.2722	4.4695	3.9784	4.7718	4.9369	4.8888	4.945	5.0448	5.2319	5.2368	5.3109	5.1797	5.2122	5.3926	5.528	5.5706	5.4889	5.6427	5.5335
pos_6926	Oryzalide A	metab_6920	-	HMDB0037591	384.213	pos	M+ACN+Na	C19H28O4	3.2751	0.09824	-	57.4	-6.25752	128500-67-4	-	-	-	-	-	-	Lipids and lipid-like molecules	Prenol lipids	Terpene lactones	5.2106	5.2703	4.9237	5.3167	5.1555	5.1763	5.3216	5.3468	5.3413	5.6133	5.1304	4.679	4.9441	5.0498	4.7133	4.5007	4.384	4.4613	4.5498	4.5078	4.376	4.3838	4.3955	4.3777	4.3843	4.373
pos_6950	FRAXETIN	metab_6944	C09265	-	209.044	pos	M+H	C10H8O5	3.2191	0.0459307	73.7	-	-0.357651	-	-	-	-	-	-	-	-	-	-	6.073	6.0613	5.9857	6.0708	6.0219	2.8416	0.2316	3.3659	2.9509	3.2262	0.2459	2.8807	0.2451	0.2443	0.238	0.2463	0.2429	0.2439	0.2394	0.2423	0.2395	0.2428	0.2479	0.2402	0.243	0.2382
pos_6994	UMBELLIFERONE	metab_6988	C09315	HMDB0029865	163.039	pos	M+H	C9H6O3	3.0848	0.0904816	54.5	-	-0.552237	93-35-6	-	-	map01110;map00940;map01061	Biosynthesis of secondary metabolites; Phenylpropanoid biosynthesis; Biosynthesis of phenylpropanoids	Metabolism;Metabolism;Metabolism	Global and overview maps;Biosynthesis of other secondary metabolites;Chemical structure transformation maps	Phenylpropanoids and polyketides	Coumarins and derivatives	Hydroxycoumarins	4.8658	4.8735	5.0439	4.9495	4.7463	4.2458	4.308	4.3205	4.2327	4.1974	4.4107	4.3135	4.315	4.3941	4.4357	4.0145	3.9994	3.9623	3.8115	3.908	3.3065	3.122	3.499	3.3813	3.2741	3.2031
pos_6995	Gamma-Glu-Leu	metab_6989	-	HMDB0011171	261.144	pos	M+H	C11H20N2O5	3.0777	0.0392086	86	-	-1.06731	-	-	-	-	-	-	-	Organic acids and derivatives	Carboxylic acids and derivatives	Amino acids, peptides, and analogues	6.0938	6.1128	6.0574	6.1353	5.99	5.5127	5.5774	5.4613	5.5068	5.6478	5.2387	5.1301	5.2752	5.2822	5.2121	5.0715	5.1114	5.108	4.9968	5.1025	5.1224	5.0748	5.1357	5.0692	4.9681	5.2192
pos_7006	N-Acetylmannosamine	metab_7000	C00645	HMDB0001129	186.076	pos	M+H-2H2O	C8H15NO6	3.0428	0.00884554	-	58.8	-0.159113	7772-94-3	Carbohydrates	Monosaccharides	map01100;map00520	Metabolic pathways; Amino sugar and nucleotide sugar metabolism	Metabolism;Metabolism	Global and overview maps;Carbohydrate metabolism	Organic oxygen compounds	Organooxygen compounds	Carbohydrates and carbohydrate conjugates	5.4511	5.4461	5.4296	5.4557	5.4039	4.9383	4.9485	4.8894	4.9954	5.013	4.9256	4.8932	4.9676	4.9234	4.9505	4.918	4.9169	4.8892	4.8909	4.926	4.8929	4.8904	4.8886	4.8452	4.9652	4.7724
pos_7033	Gamma-Glutamylvaline	metab_7027	-	HMDB0011172	211.108	pos	M+H-2H2O	C10H18N2O5	2.9657	0.0540174	-	69	-0.70885	2746-34-1	-	-	-	-	-	-	Organic acids and derivatives	Carboxylic acids and derivatives	Amino acids, peptides, and analogues	3.5904	4.1163	3.6954	3.8961	3.4292	5.006	4.9302	4.6927	4.7474	4.7348	5.0249	5.2123	5.1968	5.2084	5.2344	5.2937	5.3058	5.4067	5.3348	5.4681	5.7138	5.6336	5.7468	5.6427	5.6738	5.7858
pos_7043	Acetyl-L-tyrosine	metab_7037	C01657	HMDB0000866	224.092	pos	M+H	C11H13NO4	2.9234	0.0738209	61.3	-	-0.909992	537-55-3	-	-	-	-	-	-	Organic acids and derivatives	Carboxylic acids and derivatives	Amino acids, peptides, and analogues	3.9765	4.148	3.8704	4.1054	3.523	4.6486	4.7295	4.5763	4.4742	4.6798	4.7894	4.7966	4.8004	4.8666	4.7992	4.9058	4.8961	4.8359	4.862	4.9493	5.1131	5.105	5.0221	5.0877	5.1216	5.2181
pos_7044	ESCULETIN	metab_7038	C09263	HMDB0030819	179.034	pos	M+H	C9H6O4	2.9234	0.28456	51	-	-0.427098	305-01-1	-	-	map01061	Biosynthesis of phenylpropanoids	Metabolism	Chemical structure transformation maps	Phenylpropanoids and polyketides	Coumarins and derivatives	Hydroxycoumarins	4.9362	4.8882	4.9106	4.9112	4.6835	2.8503	2.8584	2.8427	2.8636	2.8605	2.8922	2.8719	2.9972	2.8885	2.8735	2.893	2.8851	2.8875	2.877	2.8839	2.8772	2.885	2.8967	2.8789	2.8855	2.8742
pos_7067	Glycylprolylhydroxyproline	metab_7061	-	HMDB0002171	308.121	pos	M+Na	C12H19N3O5	2.8331	0.151925	-	79.3	-1.21026	2239-67-0	-	-	-	-	-	-	Organic acids and derivatives	Carboxylic acids and derivatives	Amino acids, peptides, and analogues	4.5765	4.6689	4.4615	4.824	3.7907	5.0887	5.2852	5.1207	5.3003	5.3949	5.2173	5.0642	5.1859	5.238	5.1346	4.8388	4.8724	4.7978	4.7938	4.8734	3.6607	3.8612	4.3684	3.7435	4.1593	3.4725
pos_7124	3,4,5-trihydroxy-6-[(3-methylbut-2-enoyl)oxy]oxane-2-carboxylic acid	metab_7118	-	HMDB0128920	318.118	pos	M+ACN+H	C11H16O8	2.6442	0.0236393	-	53.6	-1.66638	-	-	-	-	-	-	-	Organic oxygen compounds	Organooxygen compounds	Carbohydrates and carbohydrate conjugates	4.005	4.8171	4.5023	4.5575	4.5336	4.9865	5.0711	4.8756	4.878	4.9818	5.2491	5.2135	5.4951	5.4091	5.6747	5.6273	5.6505	5.607	5.6513	5.6053	5.9036	5.9923	5.9314	5.9677	5.9287	5.9621
pos_7131	(Z)-3-(1-Formyl-1-propenyl)pentanedioic acid	metab_7125	-	HMDB0033091	218.102	pos	M+NH4	C9H12O5	2.6162	0.0461461	-	54.7	-0.452257	-	-	-	-	-	-	-	Lipids and lipid-like molecules	Fatty Acyls	Fatty acids and conjugates	4.4074	4.6446	4.5604	4.6389	4.4647	4.5477	4.5518	4.3747	4.5662	4.4792	4.6517	4.3715	4.5546	4.6557	4.6313	4.9893	4.8838	4.9261	4.9129	4.971	5.3598	5.3578	5.3699	5.2714	5.3139	5.3012
pos_7174	Histidinyl-Proline	metab_7168	-	HMDB0028893	235.119	pos	M+H-H2O	C11H16N4O3	2.5112	0.169228	-	61.7	-0.648273	-	-	-	-	-	-	-	Organic acids and derivatives	Carboxylic acids and derivatives	Amino acids, peptides, and analogues	5.2047	4.9624	5.0146	4.8905	5.0427	4.7117	4.8686	4.9445	4.6963	5.0157	4.7287	4.2165	4.7201	4.6544	4.3001	4.4936	4.3476	3.9309	4.5019	4.4375	3.3805	3.1384	3.1171	1.9504	3.1324	3.8904
pos_7230	4-Hydroxy-3-methoxycinnamaldehyde	metab_7224	C02666	HMDB0141782	179.07	pos	M+H	C10H10O3	2.3922	0.0794842	71.3	-	-0.624166	-	-	-	map01100;map00940;map01110;map01061	Metabolic pathways; Phenylpropanoid biosynthesis; Biosynthesis of secondary metabolites; Biosynthesis of phenylpropanoids	Metabolism;Metabolism;Metabolism;Metabolism	Global and overview maps;Biosynthesis of other secondary metabolites;Global and overview maps;Chemical structure transformation maps	Benzenoids	Phenols	Methoxyphenols	5.135	5.1959	5.1318	5.1969	4.9798	4.6278	4.6744	4.6329	4.6804	4.6293	4.7959	4.7161	4.7613	4.7768	4.736	4.823	4.785	4.832	4.8107	4.8171	4.801	4.8201	4.8447	4.7618	4.8132	4.6871
pos_7254	7-Methylinosine	metab_7248	-	HMDB0003950	325.139	pos	M+ACN+H	C11H15N4O5+	2.2872	0.0336447	-	56.3	3.42562	20245-33-4	-	-	-	-	-	-	Nucleosides, nucleotides, and analogues	Purine nucleosides	Not Available	5.9648	6.0109	5.9472	6.1575	5.7332	3.9149	3.6726	3.2488	3.6703	3.9121	3.8549	3.2547	3.6595	3.6781	3.6559	3.769	3.7616	3.8992	3.2398	3.6349	3.8772	3.5917	3.3029	4.1314	3.7697	4.1419
pos_7257	4-Hydroxybenzaldehyde	metab_7251	C00633	HMDB0011718	123.044	pos	M+H	C7H6O2	2.2732	0.00908383	90.2	-	0.487888	123-08-0	-	-	map01100;map01120;map00627;map00623;map00363;map01061	Metabolic pathways; Microbial metabolism in diverse environments; Aminobenzoate degradation; Toluene degradation; Bisphenol degradation; Biosynthesis of phenylpropanoids	Metabolism;Metabolism;Metabolism;Metabolism;Metabolism;Metabolism	Global and overview maps;Global and overview maps;Xenobiotics biodegradation and metabolism;Xenobiotics biodegradation and metabolism;Xenobiotics biodegradation and metabolism;Chemical structure transformation maps	Organic oxygen compounds	Organooxygen compounds	Carbonyl compounds	5.5346	5.5544	5.5371	5.5781	5.4568	5.0691	5.1241	5.1392	5.024	5.3018	5.1326	4.8904	5.2933	5.1394	5.0397	5.132	5.2191	5.1253	5.1187	5.2281	5.1122	5.1436	5.0671	5.0821	5.2759	5.1132
pos_7258	Vanillylamine	metab_7252	C16666	HMDB0012309	136.076	pos	M+H-H2O	C8H11NO2	2.2662	0.027834	-	58.6	-0.273718	1196-92-5	-	-	map01100;map01063;map01110;map00998	Metabolic pathways; Biosynthesis of alkaloids derived from shikimate pathway; Biosynthesis of secondary metabolites; Biosynthesis of various secondary metabolites - part 2	Metabolism;Metabolism;Metabolism;Metabolism	Global and overview maps;Chemical structure transformation maps;Global and overview maps;Biosynthesis of other secondary metabolites	Benzenoids	Phenols	Methoxyphenols	5.7128	5.6753	5.699	5.6867	5.7014	5.4695	5.5476	5.5396	5.4406	5.753	5.5385	5.254	5.7437	5.5084	5.3821	5.5035	5.6425	5.5164	5.4927	5.6831	5.5008	5.5413	5.4294	5.3994	5.753	5.5204
pos_7267	Benzaldehyde	metab_7261	C00261	HMDB0006115	107.049	pos	M+H	C7H6O	2.2032	0.02116	63	-	2.48015	100-52-7	-	-	map01100;map00627;map00623;map01120;map01220	Metabolic pathways; Aminobenzoate degradation; Toluene degradation; Microbial metabolism in diverse environments; Degradation of aromatic compounds	Metabolism;Metabolism;Metabolism;Metabolism;Metabolism	Global and overview maps;Xenobiotics biodegradation and metabolism;Xenobiotics biodegradation and metabolism;Global and overview maps;Global and overview maps	Benzenoids	Benzene and substituted derivatives	Benzoyl derivatives	4.9114	4.8854	4.8848	4.8945	4.8677	5.2307	5.187	5.12	5.1509	5.2563	4.921	5.1936	5.0197	4.8803	5.0362	4.7977	4.821	4.7998	4.793	4.8725	4.8409	4.8102	4.8553	4.8314	4.9442	4.8267
pos_7276	(2S)-2-{[1-(R)-Carboxyethyl]amino}pentanoate	metab_7270	C06326	-	190.107	pos	M+H	C8H15NO4	2.1612	0.0762203	60	-	-0.645149	-	-	-	-	-	-	-	-	-	-	4.96	5.0305	4.9203	4.9984	4.8805	5.3088	5.3856	5.1815	5.3408	5.3503	5.4876	5.3555	5.4179	5.456	5.4156	5.5376	5.4933	5.5066	5.4914	5.5006	5.6522	5.6301	5.626	5.5798	5.5869	5.6861
pos_7341	(+/-)-2-Hydroxy-4-(methylthio)butanoic acid	metab_7335	-	-	151.042	pos	M+H	C5H10O3S	1.8112	0.073118	50.3	-	-0.865255	-	-	-	-	-	-	-	-	-	-	2.6137	2.6552	2.6456	2.6173	2.6194	2.6944	2.7025	2.6867	2.7077	2.7046	4.9114	4.8465	5.0114	5.0009	4.9784	5.2774	5.2977	5.2553	5.2969	5.274	5.5817	5.6244	5.5748	5.6031	5.817	5.6489
pos_7447	(S)-Piperidine-2-carboxamide	metab_7440	C19809	-	129.102	pos	M+H	C6H12N2O	1.5731	0.0891246	73.4	-	0.424317	-	-	-	-	-	-	-	-	-	-	4.4548	4.6875	4.4161	4.6893	4.6373	3.8036	4.036	3.8287	4.0848	3.9752	3.7541	3.7809	3.9466	3.7177	3.6573	3.8739	3.9171	3.8258	3.8564	3.9577	4.0892	4.0616	4.0269	4.0238	4.1429	4.0768
pos_7478	N2-Succinyl-L-ornithine	metab_7471	C03415	HMDB0001199	233.113	pos	M+H	C9H16N2O5	1.4961	0.0381267	61.8	-	-0.731521	899816-95-6	-	-	map01100;map00330	Metabolic pathways; Arginine and proline metabolism	Metabolism;Metabolism	Global and overview maps;Amino acid metabolism	Organic acids and derivatives	Carboxylic acids and derivatives	Amino acids, peptides, and analogues	5.1586	5.1307	5.1419	5.2331	5.2216	4.7525	4.8462	4.6238	4.7578	4.8454	4.8237	4.6298	4.7624	4.7426	4.6552	4.7227	4.6868	4.717	4.6348	4.6894	4.5513	4.5241	4.6536	4.5148	4.6049	4.5261
pos_7487	2,6-Diamino-7-hydroxy-azelaic acid	metab_7480	C12025	-	235.129	pos	M+H	C9H18N2O5	1.4611	0.0367647	57.4	-	-0.995941	-	-	-	-	-	-	-	-	-	-	6.2172	6.3017	6.3258	6.2964	6.3279	6.1603	6.1696	5.9252	6.1357	6.1293	6.1552	6.0016	6.2089	6.1486	6.0834	6.1508	6.1207	6.1087	6.0624	6.1289	6.0965	6.0473	6.0752	6.0313	6.1028	6.0471
pos_7548	5'-O-beta-D-Glucosylpyridoxine	metab_7541	C03996	-	332.134	pos	M+H	C14H21NO8	1.268	0.100139	86.3	-	-1.06494	-	-	-	-	-	-	-	-	-	-	6.4579	6.3539	6.2849	6.1938	6.3351	3.4625	3.4706	3.4548	3.7694	5.262	3.5044	3.484	3.5024	3.5007	3.4857	3.5052	3.4973	3.4997	3.4892	3.4961	3.4893	3.4972	3.5089	3.4911	3.4977	3.4863
pos_7636	Apigenin 7-[feruloyl-(->2)-glucuronyl-(1->2)-glucuronide] 4'-glucuronide	metab_7629	-	HMDB0038301	499.097	pos	M+H+Na	C43H42O26	1.1075	0.0489677	-	53.1	1.32461	-	-	-	-	-	-	-	Phenylpropanoids and polyketides	Flavonoids	Flavonoid glycosides	5.5996	5.6569	5.6337	5.6109	5.5304	5.2289	5.217	5.7229	5.828	6.1002	5.2844	3.6618	5.7746	5.4512	5.2781	3.7827	5.2653	4.6126	4.977	4.9909	3.6671	3.6749	3.7175	3.6688	4.6549	3.6641
pos_7664	Stachyose	metab_7657	C01613	HMDB0003553	689.21	pos	M+Na	C24H42O21	1.0724	0.129664	90.6	-	-1.11908	470-55-3	-	-	map01100;map00052	Metabolic pathways; Galactose metabolism	Metabolism;Metabolism	Global and overview maps;Carbohydrate metabolism	Organic oxygen compounds	Organooxygen compounds	Carbohydrates and carbohydrate conjugates	4.5854	5.71	5.8879	5.4706	5.3897	5.0064	5.087	4.6896	5.8102	5.9913	5.836	4.3929	6.112	5.8614	5.6205	5.1542	5.6396	5.574	5.707	6.0042	5.2911	4.5434	5.4504	4.885	6.0457	4.3952
pos_7668	3-Buten-1-amine	metab_7661	C12244	-	72.0813	pos	M+H	C4H9N	1.0724	0.0251356	82.2	-	7.58814	-	-	-	-	-	-	-	-	-	-	5.8944	5.9073	5.9102	5.9075	5.9973	6.434	6.4688	6.3442	6.4046	6.4569	6.3926	6.4073	6.3964	6.4499	6.3878	6.4628	6.4391	6.462	6.4291	6.4818	6.4526	6.4307	6.5046	6.4345	6.4181	6.3949
pos_7699	Nalpha-Acetyl-L-arginine	metab_7692	-	-	217.129	pos	M+H	C8H16N4O3	1.0308	0.0829067	69.8	-	-0.676202	-	-	-	-	-	-	-	-	-	-	4.5334	4.5822	4.525	4.6271	4.326	4.7066	4.4619	4.5497	4.3376	4.6939	4.3857	4.374	4.7405	4.513	4.6258	4.5897	4.8214	4.5529	4.656	4.8286	4.6016	4.4998	4.411	4.4248	4.9845	4.5421
pos_7794	L-Proline	metab_7787	C00148	HMDB0000162	116.071	pos	M+H	C5H9NO2	0.9129	0.0275173	88.2	-	1.95511	147-85-3	Peptides	Amino acids	map01100;map04978;map01110;map02010;map00330;map00332;map00333;map04974;map01230;map00970;map05230;map00401;map00404	Metabolic pathways; Mineral absorption; Biosynthesis of secondary metabolites; ABC transporters; Arginine and proline metabolism; Carbapenem biosynthesis; Prodigiosin biosynthesis; Protein digestion and absorption; Biosynthesis of amino acids; Aminoacyl-tRNA biosynthesis; Central carbon metabolism in cancer; Novobiocin biosynthesis; Staurosporine biosynthesis	Metabolism;Organismal Systems;Metabolism;Environmental Information Processing;Metabolism;Metabolism;Metabolism;Organismal Systems;Metabolism;Genetic Information Processing;Human Diseases;Metabolism;Metabolism	Global and overview maps;Digestive system;Global and overview maps;Membrane transport;Amino acid metabolism;Biosynthesis of other secondary metabolites;Biosynthesis of other secondary metabolites;Digestive system;Global and overview maps;Translation;Cancer: overview;Biosynthesis of other secondary metabolites;Biosynthesis of other secondary metabolites	Organic acids and derivatives	Carboxylic acids and derivatives	Amino acids, peptides, and analogues	5.9486	6.191	6.0965	5.9944	5.9978	6.5913	6.4354	6.4118	6.4329	6.6226	5.5779	5.9752	5.8751	5.6661	5.994	5.4604	5.59	5.4854	5.4505	5.5962	5.3448	5.4257	5.2758	5.2737	5.666	5.2866
pos_7796	L-Pyridosine	metab_7789	-	HMDB0029443	255.134	pos	M+H	C12H18N2O4	0.9059	0.165997	-	63.3	-1.03866	31489-08-4	-	-	-	-	-	-	Organic acids and derivatives	Carboxylic acids and derivatives	Amino acids, peptides, and analogues	5.7185	5.575	5.5644	5.6027	5.6907	5.33	5.343	5.2648	5.1719	5.158	4.5046	4.7742	4.2595	3.6874	4.312	3.6918	3.684	3.6863	3.6759	3.6827	3.676	3.6838	3.6955	3.6777	3.6843	3.673
pos_7862	Betaine	metab_7855	C00719	HMDB0000043	118.086	pos	M+H	C5H11NO2	0.85	0.025224	66.5	-	1.4356	6915-17-9	-	-	map01100;map02010;map00260	Metabolic pathways; ABC transporters; Glycine, serine and threonine metabolism	Metabolism;Environmental Information Processing;Metabolism	Global and overview maps;Membrane transport;Amino acid metabolism	Organic acids and derivatives	Carboxylic acids and derivatives	Amino acids, peptides, and analogues	7.8155	7.8352	7.8496	7.8332	7.8181	7.6894	7.7302	7.6764	7.7012	7.6873	7.3001	7.4191	7.237	7.1432	7.2773	6.7064	6.7253	6.6656	6.6455	6.7091	6.661	6.6372	6.6639	6.6237	6.6849	6.6166
pos_7867	L-Methionine	metab_7860	C00073	HMDB0000696;HMDB0033951	150.058	pos	M+H	C5H11NO2S	0.843	0.0229964	72.9	-	-0.223372	63-68-3	Peptides	Amino acids	map01100;map04978;map01110;map01210;map00270;map01230;map00966;map04974;map00970;map01523;map05230;map01070;map01060	Metabolic pathways; Mineral absorption; Biosynthesis of secondary metabolites; 2-Oxocarboxylic acid metabolism; Cysteine and methionine metabolism; Biosynthesis of amino acids; Glucosinolate biosynthesis; Protein digestion and absorption; Aminoacyl-tRNA biosynthesis; Antifolate resistance; Central carbon metabolism in cancer; Biosynthesis of plant hormones; Biosynthesis of plant secondary metabol…	Metabolism;Organismal Systems;Metabolism;Metabolism;Metabolism;Metabolism;Metabolism;Organismal Systems;Genetic Information Processing;Human Diseases;Human Diseases;Metabolism;Metabolism	Global and overview maps;Digestive system;Global and overview maps;Global and overview maps;Amino acid metabolism;Global and overview maps;Biosynthesis of other secondary metabolites;Digestive system;Translation;Drug resistance: antineoplastic;Cancer: overview;Chemical structure transformation maps;Chemical structure transformation maps	Organic acids and derivatives	Carboxylic acids and derivatives	Amino acids, peptides, and analogues	5.4292	5.443	5.4942	5.3772	5.5863	5.9432	5.9558	6.0319	5.8203	6.0498	5.7493	5.6702	5.8028	5.8206	5.7563	5.6614	5.6581	5.5937	5.6299	5.6506	4.633	4.4604	4.7139	3.8761	4.904	3.8714
pos_7949	4-Guanidinobutanoic acid	metab_7942	C01035	HMDB0031842;HMDB0003464	146.092	pos	M+H	C5H11N3O2	0.8012	0.0410338	65.3	-	-0.481006	463-00-3	-	-	map01100;map00330	Metabolic pathways; Arginine and proline metabolism	Metabolism;Metabolism	Global and overview maps;Amino acid metabolism	Phenylpropanoids and polyketides	Stilbenes	Not Available	4.9418	5.3167	5.1746	5.2725	4.9354	5.1499	5.2231	5.1935	5.2831	5.1638	5.2031	5.12	5.1798	5.1556	5.1391	5.1476	5.14	5.1604	5.1676	5.0914	5.1387	5.1596	5.1688	5.1508	5.1552	5.1626
pos_8124	5-Fluorodeoxyuridine monophosphate	metab_8117	C04242	HMDB0060394	291.019	pos	M+H-2H2O	C9H12FN2O8P	0.697	0.149505	-	51.2	5.28508	-	-	-	map00983	Drug metabolism - other enzymes	Metabolism	Xenobiotics biodegradation and metabolism	Nucleosides, nucleotides, and analogues	Pyrimidine nucleotides	Pyrimidine deoxyribonucleotides	6.3528	6.3685	6.2274	6.277	6.2944	5.2759	5.0506	5.1288	4.9948	5.0783	4.9968	4.981	4.9404	4.8898	5.108	4.984	4.9344	4.9028	4.9637	4.8268	4.7638	4.8182	4.7254	4.9809	4.7675	5.0416
pos_8268	3,4,5-trihydroxy-6-(3-{3,5,7-trihydroxy-4-[3,5,7-trihydroxy-2-(3-hydroxyphenyl)-3,4-dihydro-2H-1-benzopyran-8-yl]-6-[3,4,5-trihydroxy-6-(hydroxymethyl)oxan-2-yl]-3,4-dihydro-2H-1-benzopyran-2-yl}phenoxy)oxane-2-carboxylic acid	metab_8261	-	HMDB0126791	443.123	pos	M+2H	C42H44O21	0.5787	0.0824089	-	62.8	-6.70247	-	-	-	-	-	-	-	Phenylpropanoids and polyketides	Flavonoids	Biflavonoids and polyflavonoids	6.1698	6.2889	6.3562	6.2691	6.1498	4.3479	4.1047	5.1879	5.5687	6.2379	4.8291	4.1182	5.7712	4.9071	4.5618	4.1393	4.2734	4.1338	4.1234	4.1302	4.1235	4.1313	4.143	4.1252	4.1318	4.1205
pos_8320	Diacetone alcohol	metab_8313	-	HMDB0031511	134.118	pos	M+NH4	C6H12O2	0.5647	0.0398061	-	64.4	-0.100137	123-42-2	-	-	-	-	-	-	Organic oxygen compounds	Organooxygen compounds	Carbonyl compounds	5.944	6.0576	6.1198	6.0497	5.9314	5.669	5.6051	5.565	5.6259	5.5563	5.5079	5.4784	5.453	5.4439	5.4972	5.3491	5.3577	5.3327	5.3269	5.3038	5.4005	5.4727	5.4927	5.4542	5.4743	5.3291
pos_8322	2-Furanmethanol	metab_8315	C20441	HMDB0013742	99.0444	pos	M+H	C5H6O2	0.5647	0.289071	55.5	-	3.86144	98-00-0	-	-	map01120;map00365	Microbial metabolism in diverse environments; Furfural degradation	Metabolism;Metabolism	Global and overview maps;Xenobiotics biodegradation and metabolism	Organoheterocyclic compounds	Heteroaromatic compounds	Not Available	5.1137	5.1669	5.1476	5.1027	5.1146	3.9908	3.8906	4.024	4.0862	3.9359	3.8728	3.4841	3.7959	3.9824	4.1356	4.1877	3.6442	3.6912	4.0305	4.061	3.8316	3.4699	3.4863	3.5438	3.373	3.3457
pos_8323	2-Cyclopentene-1,4-dione	metab_8316	-	-	97.0288	pos	M+H	C5H4O2	0.5647	0.0656761	50.2	-	3.90491	-	-	-	-	-	-	-	-	-	-	5.5636	5.5909	5.6146	5.5519	5.5742	3.6061	3.8234	4.2426	4.1703	4.5465	3.9737	3.5479	4.3708	3.7689	4.0163	3.5947	3.8924	3.6252	3.4609	3.4466	3.1904	3.1201	3.1318	3.114	3.5457	3.1092
pos_8367	L-Methionine S-oxide	metab_8359	C02989	HMDB0002005	166.053	pos	M+H	C5H11NO3S	0.5371	0.0777987	56.8	-	-0.13841	-	-	-	map00270	Cysteine and methionine metabolism	Metabolism	Amino acid metabolism	Organic acids and derivatives	Carboxylic acids and derivatives	Amino acids, peptides, and analogues	4.3811	4.6195	4.8259	4.717	4.9221	5.1935	5.0176	4.9903	5.1405	5.1143	4.8924	5.1413	5.0698	5.0597	5.1752	5.0219	5.0067	5.0201	4.9595	4.9861	4.4195	4.5307	4.7729	3.4377	4.8597	3.7706
pos_8391	L-Glutamine	metab_8382	C00064	HMDB0000641;HMDB0003423	147.076	pos	M+H	C5H10N2O3	0.5238	0.0748245	93.1	-	-0.216008	56-85-9	Peptides	Amino acids	map01100;map00630;map00220;map00230;map01120;map04964;map00471;map02010;map00910;map04978;map01230;map00240;map04974;map00250;map02020;map00970;map04727;map05230;map04724;map01060	Metabolic pathways; Glyoxylate and dicarboxylate metabolism; Arginine biosynthesis; Purine metabolism; Microbial metabolism in diverse environments; Proximal tubule bicarbonate reclamation; D-Glutamine and D-glutamate metabolism; ABC transporters; Nitrogen metabolism; Mineral absorption; Biosynthesis of amino acids; Pyrimidine metabolism; Protein digestion and absorption; Alanine, aspartate and g…	Metabolism;Metabolism;Metabolism;Metabolism;Metabolism;Organismal Systems;Metabolism;Environmental Information Processing;Metabolism;Organismal Systems;Metabolism;Metabolism;Organismal Systems;Metabolism;Environmental Information Processing;Genetic Information Processing;Organismal Systems;Human Diseases;Organismal Systems;Metabolism	Global and overview maps;Carbohydrate metabolism;Amino acid metabolism;Nucleotide metabolism;Global and overview maps;Excretory system;Metabolism of other amino acids;Membrane transport;Energy metabolism;Digestive system;Global and overview maps;Nucleotide metabolism;Digestive system;Amino acid metabolism;Signal transduction;Translation;Nervous system;Cancer: overview;Nervous system;Chemical stru…	Organic acids and derivatives	Carboxylic acids and derivatives	Amino acids, peptides, and analogues	6.0753	6.1973	6.1213	6.1021	6.2669	3.085	3.0931	3.0774	3.0983	3.0952	3.3652	3.8314	4.2235	3.1232	3.1083	3.6161	4.0829	3.8905	4.1713	4.0353	3.1119	3.1197	3.1314	3.3551	3.5951	3.5281
pos_8414	Glycerophosphocholine	metab_8405	C00670	HMDB0008586;HMDB0008062;HMDB0008261;HMDB0008719;HMDB0007928;HMDB0008786;HMDB0008622;HMDB0008721;HMDB0007962;HMDB0008226;HMDB0008458;HMDB0008060;HMDB0011225;HMDB0008554;HMDB0008162;HMDB0008654;HMDB0008393;HMDB0008094;HMDB0008093;HMDB0008357;HMDB0008027;HMDB0007931;HMDB0007930;HMDB0011221;HMDB0011226;HMDB0008422;HMDB0008326;HMDB0008619;HMDB0008521;HMDB0008258;HMDB0008327;HMDB0008784;HMDB0008685;HMD…	296.066	pos	M+K	C8H20NO6P	0.5102	0.202972	-	63.6	-1.46868	28319-77-9	-	-	map00565;map00564;map05231	Ether lipid metabolism; Glycerophospholipid metabolism; Choline metabolism in cancer	Metabolism;Metabolism;Human Diseases	Lipid metabolism;Lipid metabolism;Cancer: overview	Lipids and lipid-like molecules	Glycerophospholipids	Glycerophosphocholines	4.5105	5.4451	5.7357	4.4669	5.0073	3.679	3.6871	3.6714	4.405	4.5656	4.7951	3.8248	4.8133	5.0605	3.7023	3.9553	4.2841	4.1348	4.5392	4.7673	3.7059	4.0031	3.7255	3.7165	4.5475	3.7029
pos_8541	Pyrrolidine	metab_8532	-	HMDB0031641	72.0813	pos	M+H	C4H9N	0.4487	0.0313161	68.3	-	7.5008	123-75-1	-	-	-	-	-	-	Organoheterocyclic compounds	Pyrrolidines	Not Available	4.3341	4.052	4.2502	4.1431	4.4197	5.849	5.9058	5.7811	5.829	5.7979	5.9101	5.8602	5.8805	5.9468	5.872	5.9605	5.9383	5.9487	5.9461	5.9447	5.9503	5.9328	5.9528	5.9151	5.9099	5.9183
pos_574	2-Hydroxycinnamic acid	metab_8688	C01772;C05838	HMDB0041592;HMDB0134028;HMDB0002641	182.081	pos	M+H, M+NH4	C9H8O3	1.2957	0.0228263	79.4	-	-0.395951	614-60-8	-	-	map01100;map00940;map00360;map01110;map01120	Metabolic pathways; Phenylpropanoid biosynthesis; Phenylalanine metabolism; Biosynthesis of secondary metabolites; Microbial metabolism in diverse environments	Metabolism;Metabolism;Metabolism;Metabolism;Metabolism	Global and overview maps;Biosynthesis of other secondary metabolites;Amino acid metabolism;Global and overview maps;Global and overview maps	Phenylpropanoids and polyketides	Cinnamic acids and derivatives	Hydroxycinnamic acids and derivatives	6.7569	6.7122	6.7254	6.7211	6.757	6.3886	6.5245	6.4678	6.3776	6.7441	6.4874	5.9847	6.7188	6.4249	6.2295	6.4148	6.5711	6.4603	6.383	6.6525	6.3851	6.3959	6.2983	6.205	6.7273	6.3418
pos_6776	Indole	metab_8689	C00463	HMDB0035924;HMDB0000738	118.065	pos	M+H	C8H7N	3.6753	0.0295778	75.4	-	1.41949	120-72-9	-	-	map01100;map01110;map04974;map00402;map00400;map00380	Metabolic pathways; Biosynthesis of secondary metabolites; Protein digestion and absorption; Benzoxazinoid biosynthesis; Phenylalanine, tyrosine and tryptophan biosynthesis; Tryptophan metabolism	Metabolism;Metabolism;Organismal Systems;Metabolism;Metabolism;Metabolism	Global and overview maps;Global and overview maps;Digestive system;Biosynthesis of other secondary metabolites;Amino acid metabolism;Amino acid metabolism	Organoheterocyclic compounds	Heteroaromatic compounds	Not Available	6.0472	6.0665	6.041	6.0475	6.0699	6.0836	6.0797	6.0615	6.0448	6.0597	6.1246	6.0996	6.1311	6.1353	6.1062	6.154	6.1266	6.1672	6.134	6.1505	6.08	6.0929	6.123	6.0516	6.1099	6.0642
pos_7433	Indole-3-carboxaldehyde	metab_8690	C08493	HMDB0029737;HMDB0000195;HMDB0000197	146.06	pos	M+H	C9H7NO	1.5801	0.0228709	61.7	-	-0.480876	487-89-8	-	-	-	-	-	-	Organoheterocyclic compounds	Indoles and derivatives	Indoles	4.548	4.6547	4.527	4.6073	4.562	4.6768	4.6803	4.6524	4.7283	4.6953	4.6961	4.7272	4.691	4.6949	4.7038	4.7226	4.7366	4.7737	4.7103	4.739	4.8465	5.0749	4.9651	4.8204	4.9535	5.0044
pos_2457	Isonicotinic acid	metab_8691	C07446	HMDB0041912;HMDB0060665	124.039	pos	M+H	C6H5NO2	1.1356	0.0360139	74.5	-	0.902762	55-22-1	-	-	map00983	Drug metabolism - other enzymes	Metabolism	Xenobiotics biodegradation and metabolism	Organic acids and derivatives	Carboxylic acids and derivatives	Amino acids, peptides, and analogues	5.6358	5.6642	5.6529	5.6581	5.6953	5.7324	5.7795	5.7215	5.7434	5.7399	5.7213	5.7391	5.7172	5.7521	5.7212	5.6283	5.6262	5.6369	5.5819	5.6386	5.4946	5.4103	5.4762	5.434	5.4527	5.1985
pos_3365	Zeranol	metab_8692	C14752	HMDB0041824;HMDB0032702	340.211	pos	M+NH4	C18H26O5	4.9876	0.0781414	-	66.3	-1.42384	36455-72-8;26538-44-3	-	-	-	-	-	-	Phenylpropanoids and polyketides	Macrolides and analogues	Not Available	4.5926	4.7938	4.704	4.6865	4.3039	5.2003	5.1907	5.0845	5.4449	5.2868	5.372	5.2803	5.2018	5.2098	5.1541	4.8918	5.1614	5.0791	5.0179	5.0669	4.3777	4.3073	4.4223	4.3245	4.045	3.7221
neg_22	Polyethylene, oxidized	metab_8714	-	HMDB0032472	243.124	neg	M-H, M+Na-2H, M+K-2H, M-H2O-H	C12H20O5	5.529	0.00989063	-	62.9	-0.997956	68441-17-8	-	-	-	-	-	-	Organic acids and derivatives	Keto acids and derivatives	Medium-chain keto acids and derivatives	6.9898	6.9767	6.912	7.0515	6.9915	7.2514	7.2706	7.182	7.2606	7.2126	7.2346	7.2323	7.2063	7.2576	7.2404	7.1968	7.1844	7.198	7.1792	7.1803	7.1359	7.1544	7.1995	7.1497	7.1272	7.1499
neg_26	13(S)-HpODE	metab_8718	C04717	HMDB0003871	311.223	neg	M-H, M+Cl, M+Na-2H, M+FA-H	C18H32O4	6.3127	0.0144387	59	-	-0.216698	-	-	-	map01100;map00591	Metabolic pathways; Linoleic acid metabolism	Metabolism;Metabolism	Global and overview maps;Lipid metabolism	Lipids and lipid-like molecules	Fatty Acyls	Lineolic acids and derivatives	7.1322	7.1011	7.1353	7.2408	7.238	7.6352	7.6682	7.6949	7.6415	7.67	7.6683	7.6834	7.6529	7.6631	7.6433	7.7403	7.7216	7.749	7.7381	7.7044	7.6798	7.785	7.7739	7.7582	7.7071	7.8054
neg_102	6-[(10-{[2,2-dimethyl-7,10-bis(2-methylbut-3-en-2-yl)-8-oxo-2H,8H-pyrano[3,2-g]chromen-5-yl]oxy}-2-methyl-7-(2-methylbut-3-en-2-yl)-5-[(2-methylbut-3-en-2-yl)oxy]-8-oxo-2H,8H-pyrano[3,2-g]chromen-2-yl)methoxy]-3,4,5-trihydroxyoxane-2-carboxylic acid	metab_8794	-	HMDB0133029	995.415	neg	M-H, M+Cl, M+FA-H	C54H62O15	5.9895	0.0627729	-	69.8	8.40461	-	-	-	-	-	-	-	Phenylpropanoids and polyketides	Coumarins and derivatives	Pyranocoumarins	4.7404	6.4106	6.6012	5.8691	6.2112	6.0771	6.1256	5.8521	6.563	6.8698	6.5077	5.6725	6.7297	6.6198	5.9916	5.9874	6.6595	6.0045	6.5531	6.7247	5.7421	5.6661	5.729	5.9946	6.9253	5.4347
neg_104	9,10-DiHOME	metab_8796	C14828	HMDB0004704;LMFA02000229	313.238	neg	M-H, M+Cl, M+Na-2H	C18H34O4	6.3472	0.0163869	59.7	-	-0.234954	-	-	-	map00591	Linoleic acid metabolism	Metabolism	Lipid metabolism	Lipids and lipid-like molecules	Fatty Acyls	Fatty acids and conjugates	6.4498	6.379	6.4617	6.6036	6.6542	7.261	7.2213	7.3012	7.2547	7.2272	7.3418	7.3652	7.3465	7.3638	7.3546	7.5236	7.486	7.5179	7.5457	7.4849	7.5011	7.616	7.597	7.5426	7.5313	7.6916
neg_115	9(S)-HpOTrE	metab_8807	C16321	-	309.207	neg	M-H, M+FA-H, M+Cl	C18H30O4	6.299	0.0144826	80.7	-	0.137421	-	-	-	map00592;map01110	alpha-Linolenic acid metabolism; Biosynthesis of secondary metabolites	Metabolism;Metabolism	Lipid metabolism;Global and overview maps	-	-	-	7.3722	7.4488	7.4062	7.4469	7.2916	7.772	7.8034	7.7474	7.9202	7.8772	7.7463	7.7705	7.7131	7.6657	7.704	7.576	7.7369	7.6887	7.6449	7.6049	7.523	7.5233	7.6218	7.4958	7.4415	7.3362
neg_190	Carissanol	metab_8882	-	HMDB0030081	375.145	neg	M-H, M+Cl, M+FA-H	C20H24O7	4.0735	0.00875154	-	63.3	-0.219229	87402-76-4	-	-	-	-	-	-	Lignans, neolignans and related compounds	Furanoid lignans	Tetrahydrofuran lignans	5.717	5.803	5.7151	5.8242	5.6467	6.8968	6.756	7.0956	6.2964	6.5074	6.8417	6.7347	6.9812	6.8923	6.916	6.9674	6.9652	7.0023	6.9403	6.9757	6.7363	6.8139	6.7702	6.7509	6.6617	5.833
neg_354	(S)-2-Azetidinecarboxylic acid	metab_9045	-	HMDB0029615	146.045	neg	M+FA-H, 3M-H	C4H7NO2	0.5273	0.0336425	-	50.7	-7.69349	2133-34-8	-	-	-	-	-	-	Organic acids and derivatives	Carboxylic acids and derivatives	Amino acids, peptides, and analogues	6.277	6.2894	6.3275	6.2858	6.3557	6.2179	6.249	6.2608	6.1988	6.2399	6.3086	6.2933	6.2935	6.2962	6.3172	6.3196	6.3132	6.3263	6.3129	6.3249	5.5311	5.5407	5.7262	5.3872	5.7715	5.2839
neg_468	Methylmalonic acid	metab_9159	C02170	HMDB0000202;LMFA01170118	117.018	neg	M-H2O-H, M-H	C4H6O4	1.1914	0.0181644	70.3	-	-8.24394	516-05-2	-	-	map00240;map00640;map01100;map00280	Pyrimidine metabolism; Propanoate metabolism; Metabolic pathways; Valine, leucine and isoleucine degradation	Metabolism;Metabolism;Metabolism;Metabolism	Nucleotide metabolism;Carbohydrate metabolism;Global and overview maps;Amino acid metabolism	Organic acids and derivatives	Carboxylic acids and derivatives	Dicarboxylic acids and derivatives	6.6623	6.7076	6.6759	6.7201	6.7036	7.9455	7.9454	7.8435	7.8702	7.842	7.8815	7.8837	7.8819	7.9076	7.881	7.9332	7.9135	7.9021	7.9007	7.918	7.907	7.916	7.9354	7.936	7.9211	7.9477
neg_474	Uridine	metab_9165	C00299	HMDB0000296	243.062	neg	M-H, M+Cl	C9H12N2O6	1.2735	0.044218	72.5	-	-1.02612	58-96-8	Nucleic acids	Nucleosides	map00240;map01100;map02010	Pyrimidine metabolism; Metabolic pathways; ABC transporters	Metabolism;Metabolism;Environmental Information Processing	Nucleotide metabolism;Global and overview maps;Membrane transport	Nucleosides, nucleotides, and analogues	Pyrimidine nucleosides	Not Available	6.0884	6.0155	6.0801	6.027	6.1835	5.4043	4.8948	5.3247	4.5091	5.2589	4.345	4.7472	5.1773	3.7547	3.8657	3.7134	3.6201	3.1857	3.185	4.8005	4.3164	4.1686	4.1488	3.5882	4.714	4.4639
neg_518	Inosine	metab_9209	C00294	HMDB0000195	267.073	neg	M-H2O-H, M-H	C10H12N4O5	1.5806	0.112577	79.7	-	-5.67496	58-63-9	-	-	map01100;map02010;map00230	Metabolic pathways; ABC transporters; Purine metabolism	Metabolism;Environmental Information Processing;Metabolism	Global and overview maps;Membrane transport;Nucleotide metabolism	Nucleosides, nucleotides, and analogues	Purine nucleosides	Not Available	5.1709	5.2446	5.2677	5.2085	5.1762	5.0656	5.1724	4.9835	5.1431	5.1762	4.8855	4.8548	4.8531	4.7806	4.8178	4.7007	4.7764	4.7119	4.7088	4.7241	4.5139	4.5111	4.5243	4.4353	4.4439	4.0875
neg_620	[(3,4,5-trihydroxy-6-{1,2,6-trihydroxy-3-[hydroxy(3,4,5-trihydroxyoxan-2-yl)methyl]-5-[(2E)-3-(4-hydroxyphenyl)prop-2-enoyl]-4-oxocyclohexa-2,5-dien-1-yl}oxan-2-yl)methoxy]sulfonic acid	metab_9311	-	HMDB0128228	691.12	neg	M-H, M+Na-2H	C27H32O19S	3.6934	0.00954537	-	50.9	1.69732	-	-	-	-	-	-	-	Phenylpropanoids and polyketides	Cinnamic acids and derivatives	Hydroxycinnamic acids and derivatives	6.5796	6.5188	6.484	6.5694	6.4368	6.4769	6.3939	6.4773	6.2525	6.3042	6.5344	6.4941	6.4294	6.4823	6.5491	6.3754	6.4403	6.4321	6.3983	6.3463	6.311	6.1122	6.1934	6.3092	6.0644	4.7564
neg_629	Gravacridonetriol glucoside	metab_9320	-	HMDB0029331	518.167	neg	M-H, M+Na-2H	C25H29NO11	3.8024	0.0287747	-	51.7	0.194866	59086-96-3	-	-	-	-	-	-	Lipids and lipid-like molecules	Glycerolipids	Glycosylglycerols	6.3343	6.4863	6.4532	6.4452	6.4177	6.1596	6.2627	6.2032	5.9534	6.0776	6.4595	6.4425	6.4792	6.5517	6.4761	6.6539	6.6189	6.6681	6.6208	6.6757	6.6768	6.7583	6.677	6.7361	6.7318	6.7367
neg_688	{[1-(3-methoxyphenyl)-3-(2,4,6-trihydroxyphenyl)propan-2-yl]oxy}sulfonic acid	metab_9379	-	HMDB0127782	415.071	neg	M-H, M+FA-H	C16H18O8S	4.3435	0.177375	-	56.7	0.277948	-	-	-	-	-	-	-	Phenylpropanoids and polyketides	Linear 1,3-diarylpropanoids	Cinnamylphenols	3.0842	3.1049	3.1038	3.0595	3.1158	3.2685	3.2701	3.2589	3.2619	3.2412	3.2775	3.2731	3.2692	3.2727	3.2815	3.3254	3.3074	3.3083	3.3076	3.3165	3.345	3.3404	3.3284	3.3478	3.3387	5.2494
neg_764	Gamma-CEHC	metab_9454	-	HMDB0001931	263.129	neg	M-H, M+Na-2H	C15H20O4	5.5359	0.0375942	60.7	-	-0.172352	178167-75-4	-	-	-	-	-	-	Organoheterocyclic compounds	Benzopyrans	1-benzopyrans	5.4736	5.209	4.944	4.5298	4.278	4.9727	5.2659	5.0979	5.8409	5.467	5.3809	5.3596	5.5107	5.5247	5.4516	5.3479	5.4978	5.3304	5.4618	5.5057	5.5629	5.7063	5.6413	5.4929	5.5442	5.4532
neg_823	3,5,7-trihydroxy-2-(1-hydroxy-3-methoxy-4-oxocyclohexyl)-4H-chromen-4-one	metab_9513	-	HMDB0126514	317.067	neg	M-H2O-H, M+Na-2H	C16H16O8	6.1208	0.049644	-	58.7	-0.284704	-	-	-	-	-	-	-	Organoheterocyclic compounds	Benzopyrans	1-benzopyrans	4.9747	4.7669	4.8509	4.8294	5.0712	4.9806	5.0224	5.0092	5.0077	4.955	5.0432	5.0491	5.0328	5.0703	5.0797	6.1974	5.7172	5.875	5.9919	5.8224	6.1197	6.2008	6.4186	6.2938	6.5265	7.1575
neg_825	Bisacurone epoxide	metab_9515	-	HMDB0038503	267.16	neg	M-H, M+FA-H	C15H24O4	6.1276	0.0558036	-	58.1	-0.224624	127214-83-9	-	-	-	-	-	-	Lipids and lipid-like molecules	Prenol lipids	Sesquiterpenoids	5.1345	5.1904	5.0381	5.0416	4.9709	5.3329	5.4622	5.2296	5.4412	5.3381	5.2467	5.2319	5.2199	5.189	5.2161	5.0675	5.1452	5.1282	5.1467	5.1286	5.1494	5.2106	5.1575	5.1548	5.1971	5.1357
neg_863	Cibaric acid	metab_9553	-	LMFA02000289;HMDB0038580	323.186	neg	M-H, M+FA-H	C18H28O5	6.1758	0.013666	-	66.5	0.145491	130523-93-2	-	-	-	-	-	-	Lipids and lipid-like molecules	Fatty Acyls	Lineolic acids and derivatives	6.2545	6.3701	6.3352	6.2844	6.1336	6.6972	6.8248	6.5602	6.8196	6.7238	6.5878	6.6016	6.5367	6.4934	6.539	6.3828	6.4956	6.4702	6.4516	6.4157	6.3086	6.3437	6.3817	6.3253	6.2544	6.2778
neg_898	10,20-Dihydroxyeicosanoic acid	metab_9588	-	HMDB0031923	365.27	neg	M-H, M+Na-2H	C20H40O4	6.4569	0.0457322	-	78.9	-0.544635	120727-26-6	-	-	-	-	-	-	Lipids and lipid-like molecules	Fatty Acyls	Fatty acids and conjugates	5.537	5.5374	5.5125	5.5383	5.2851	6.1124	6.1157	6.0208	6.0445	5.9961	6.1772	6.2936	6.1926	6.2687	6.2809	6.4627	6.3697	6.4165	6.3874	6.3943	6.3786	6.3323	6.4109	6.5078	6.3311	6.5659
neg_900	LysoPC(18:2(9Z,12Z))	metab_9590	-	HMDB0010386;HMDB0061700	564.331	neg	M+Cl, M+FA-H	C26H50NO7P	6.4844	0.0552452	-	72.5	1.15642	-	-	-	-	-	-	-	Lipids and lipid-like molecules	Glycerophospholipids	Glycerophosphocholines	5.8752	6.1948	6.5793	6.0341	5.9612	5.6531	5.6563	5.6247	5.7859	6.2664	5.8494	4.8257	6.2146	5.945	5.5076	5.4912	5.8736	5.7057	5.6638	6.0422	5.1839	5.7181	5.5108	5.7176	6.5734	4.7985
neg_928	(-)-11-Hydroxy-9,15,16-trioxooctadecanoic acid	metab_9618	-	HMDB0038940	341.197	neg	M-H2O-H, M-H	C18H30O6	6.6696	0.0116104	-	80.9	0.0188261	38076-39-0	-	-	-	-	-	-	Lipids and lipid-like molecules	Fatty Acyls	Fatty acids and conjugates	6.8663	6.9223	6.8959	6.8884	6.8766	7.2032	7.3504	7.0975	7.3336	7.2264	7.0807	7.1153	7.0736	7.0012	7.0742	6.8681	6.9982	6.9936	6.9631	6.939	6.7818	6.7881	6.8747	6.7833	6.7375	6.7359
neg_973	9,10,13-Trihydroxystearic acid	metab_9663	-	HMDB0030935	313.238	neg	M-H2O-H, M+Cl	C18H36O5	6.9636	0.0143194	-	60.2	-0.0380081	50439-74-2	-	-	-	-	-	-	Lipids and lipid-like molecules	Fatty Acyls	Fatty acids and conjugates	6.5352	6.4633	6.5467	6.727	6.7971	7.3972	7.3298	7.4521	7.3853	7.333	7.4561	7.4909	7.4895	7.4837	7.4738	7.6394	7.6173	7.6543	7.6723	7.6106	7.6442	7.7502	7.7413	7.6848	7.6738	7.8268
neg_981	9,10-DHOME	metab_9671	C14828	HMDB0004704	295.228	neg	M-H2O-H, M+Na-2H	C18H34O4	7.0378	0.0233136	-	57.3	-0.588069	125356-86-7	-	-	map00591	Linoleic acid metabolism	Metabolism	Lipid metabolism	Lipids and lipid-like molecules	Fatty Acyls	Fatty acids and conjugates	6.1278	6.1756	6.1889	6.5035	6.1165	6.9101	6.9627	6.9576	7.015	7.0502	6.8955	6.9923	6.9532	6.899	6.9383	7	6.9942	7.0242	6.9918	6.9457	6.9868	7.0301	7.1218	6.9296	6.9819	6.9154
neg_1761	3-Galactosyllactose	metab_10449	-	HMDB0006599	539.139	neg	M+Cl	C18H32O16	0.8163	0.0170009	-	86.5	0.77306	273932-91-5	-	-	-	-	-	-	Organic oxygen compounds	Organooxygen compounds	Carbohydrates and carbohydrate conjugates	6.3045	6.3698	6.4682	6.3233	6.2232	4.9499	4.8675	5.3553	5.7201	5.9933	5.6637	4.1696	5.9527	5.6289	5.3547	5.0875	5.6611	5.2748	5.5709	5.5939	4.6751	4.8029	4.6879	4.4772	5.42	4.1023
neg_1818	6-ethoxy-3,4,5-trihydroxyoxane-2-carboxylic acid	metab_10506	-	HMDB0131286	267.072	neg	M+FA-H	C8H14O7	0.9117	0.0337062	-	65.4	-0.0381043	-	-	-	-	-	-	-	Organic oxygen compounds	Organooxygen compounds	Carbohydrates and carbohydrate conjugates	5.8461	5.8544	5.8376	5.7945	5.9815	4.4508	4.6089	4.7349	4.6275	4.667	4.5964	4.4392	4.6933	4.5135	4.5513	4.5226	4.6069	4.6598	4.4763	4.4792	4.1303	4.0615	3.8916	4.5491	4.3744	4.2203
neg_1987	N-Acetyl-L-alanine	metab_10671	-	HMDB0000766	130.05	neg	M-H	C5H9NO3	1.1581	0.0275025	79.5	-	-7.06	97-69-8	-	-	-	-	-	-	Organic acids and derivatives	Carboxylic acids and derivatives	Amino acids, peptides, and analogues	5.4112	5.4932	5.474	5.4401	5.6219	5.7081	5.7379	5.667	5.7256	5.674	5.7428	5.7433	5.7191	5.7211	5.714	5.7776	5.8079	5.7556	5.7481	5.7551	5.7317	5.7483	5.7567	5.7618	5.7595	5.6952
neg_1990	Xanthine	metab_10674	C00385	HMDB0000292	151.025	neg	M-H	C5H4N4O2	1.1782	0.00388555	88.5	-	-5.49762	69-89-6	-	-	map01100;map01110;map00230;map01120;map00232;map01065;map01060	Metabolic pathways; Biosynthesis of secondary metabolites; Purine metabolism; Microbial metabolism in diverse environments; Caffeine metabolism; Biosynthesis of alkaloids derived from histidine and purine; Biosynthesis of plant secondary metabolites	Metabolism;Metabolism;Metabolism;Metabolism;Metabolism;Metabolism;Metabolism	Global and overview maps;Global and overview maps;Nucleotide metabolism;Global and overview maps;Biosynthesis of other secondary metabolites;Chemical structure transformation maps;Chemical structure transformation maps	Organoheterocyclic compounds	Imidazopyrimidines	Purines and purine derivatives	5.2598	5.2012	5.2231	5.1811	5.3268	6.6368	6.5081	6.5361	6.4403	6.4851	6.3017	6.5618	6.3406	6.4104	6.4656	5.264	5.4711	5.3542	5.1356	5.3122	5.0012	4.5229	4.6158	4.1302	5.0295	4.1266
neg_2084	Guanosine	metab_10768	C00387	HMDB0000133	282.084	neg	M-H	C10H13N5O5	1.6213	0.0617659	80	-	0.043366	118-00-3	Nucleic acids	Nucleosides	map01100;map02010;map00230	Metabolic pathways; ABC transporters; Purine metabolism	Metabolism;Environmental Information Processing;Metabolism	Global and overview maps;Membrane transport;Nucleotide metabolism	Nucleosides, nucleotides, and analogues	Purine nucleosides	Not Available	4.4629	4.9317	5.1108	4.6782	5.462	3.198	3.1996	3.1883	3.1914	3.1707	3.2069	3.2025	3.1986	3.2022	3.2109	3.2548	3.2368	3.2378	3.237	3.2459	3.2744	3.2698	3.2578	3.2772	3.2681	3.2736
neg_2145	Succinylacetone	metab_10829	-	HMDB0000635	139.039	neg	M-H2O-H	C7H10O4	2.3122	0.144143	-	85.8	-5.25621	51568-18-4	-	-	-	-	-	-	Organic acids and derivatives	Keto acids and derivatives	Medium-chain keto acids and derivatives	4.7532	4.7486	4.7482	4.7764	4.736	3.9398	3.8336	3.88	3.9634	3.9369	3.9948	4.042	3.6733	3.9212	3.9272	4.0049	4.0777	4.0534	3.8619	4.0154	4.1338	4.2039	4.1082	4.1386	4.1486	4.1174
neg_2163	Blennin B	metab_10847	-	HMDB0037528	285.109	neg	M+Na-2H	C15H20O4	2.429	0.0155375	-	58.6	-6.46181	62824-37-7	-	-	-	-	-	-	Lipids and lipid-like molecules	Prenol lipids	Terpene lactones	4.5324	4.606	4.4063	4.6277	4.442	6.1947	5.9833	5.6708	5.7593	5.8095	6.1002	6.1695	6.1468	6.1776	6.2111	6.3448	6.3253	6.3429	6.3123	6.3444	6.4079	6.4401	6.4547	6.473	6.4301	6.4419
neg_2182	Xi-2,3-Dihydro-2-oxo-1H-indole-3-acetic acid	metab_10866	-	HMDB0035514	236.056	neg	M+FA-H	C10H9NO3	2.5158	0.0763299	-	60.1	-1.61617	2971-31-5	-	-	-	-	-	-	Organoheterocyclic compounds	Indoles and derivatives	Indolyl carboxylic acids and derivatives	2.712	3.4399	3.259	3.5706	2.7435	4.6104	4.3543	4.0989	4.063	4.276	4.5612	4.6285	4.6219	4.4954	4.7041	4.926	4.8635	4.8818	4.888	4.8778	5.1202	5.1362	5.1349	5.0948	5.1407	5.1642
neg_2184	3,4,5-trihydroxy-6-{4-[(1E)-3-oxo-3-[(3,4,5,6-tetrahydroxyoxan-2-yl)methoxy]prop-1-en-1-yl]phenoxy}oxane-2-carboxylic acid	metab_10868	-	HMDB0125131	501.125	neg	M-H	C21H26O14	2.5296	0.0375265	-	80.8	0.498712	-	-	-	-	-	-	-	Organic oxygen compounds	Organooxygen compounds	Carbohydrates and carbohydrate conjugates	5.4477	5.5192	5.4214	5.4832	5.2769	5.7119	5.7599	5.8011	5.6409	5.7058	5.9245	5.9812	5.899	5.9895	5.9687	6.0558	6.0385	6.0413	6.0183	6.0349	6.1015	6.1404	6.1599	6.1268	6.1393	5.4696
neg_2239	4-ethenyl-6-methoxybenzene-1,3-diol	metab_10923	-	HMDB0125519	211.061	neg	M+FA-H	C9H10O3	2.7132	0.0350219	-	53.3	-2.63782	-	-	-	-	-	-	-	Benzenoids	Phenols	Methoxyphenols	4.2822	4.2321	4.222	4.1359	4.2862	5.0711	4.9935	5.1458	4.7845	4.8838	5.1118	5.1797	5.1289	5.2	5.17	5.1101	5.135	5.1912	5.1682	5.1622	4.8413	4.9154	5.0067	4.9083	4.8744	4.1891
neg_2279	3-Methylglutaric acid	metab_10963	-	HMDB0000752	145.05	neg	M-H	C6H10O4	2.8578	0.00702175	68.8	-	-5.39135	-	-	-	-	-	-	-	Lipids and lipid-like molecules	Fatty Acyls	Fatty acids and conjugates	5.4556	5.6271	5.5589	5.5215	5.5094	6.0142	6.0055	5.9719	5.9313	5.8993	5.7857	5.7297	5.7584	5.7614	5.7775	5.7586	5.7529	5.7041	5.7241	5.7342	5.7342	5.7563	5.7197	5.7476	5.7962	5.6861
neg_2295	Acetyl-DL-Valine	metab_10979	-	-	158.082	neg	M-H	C7H13NO3	2.9258	0.0308682	61.5	-	-4.63763	-	-	-	-	-	-	-	-	-	-	5.1693	5.2244	5.1692	5.1794	5.2589	5.884	5.8649	5.7406	5.792	5.751	5.9997	6.0053	6.0202	6.0466	6.1099	6.4898	6.4285	6.4489	6.4606	6.4543	6.8168	6.8183	6.8022	6.8239	6.7189	6.7781
neg_2310	3-Phenylpropionylglycine	metab_10994	-	HMDB0000860;HMDB0002042	252.088	neg	M+FA-H	C11H13NO3	2.9939	0.0366545	-	93.2	-0.732137	20989-69-9	-	-	-	-	-	-	Organic acids and derivatives	Carboxylic acids and derivatives	Amino acids, peptides, and analogues	4.8426	4.7662	4.6757	4.6922	4.9808	4.8308	4.7817	4.6587	4.7713	4.6554	4.7576	4.7248	4.7408	4.7799	4.799	4.8384	4.8324	4.7825	4.8343	4.8459	4.7249	4.7485	4.7676	4.7823	4.7264	4.6087
neg_2323	3-O-p-Coumaroylquinic acid	metab_11007	-	HMDB0029681	337.093	neg	M-H	C16H18O8	3.0461	0.0310805	-	79.4	0.424606	-	-	-	-	-	-	-	Organic oxygen compounds	Organooxygen compounds	Alcohols and polyols	6.0443	6.0928	6.1008	6.0659	5.8262	5.9901	6.0691	6.1932	5.8595	6.0115	6.1208	6.1821	6.0222	6.1153	6.0853	5.9142	5.9362	5.9694	5.8948	5.9712	5.3952	5.3564	5.4862	5.4072	5.4455	4.7592
neg_2357	Simmondsin	metab_11041	-	HMDB0030394	396.13	neg	M+Na-2H	C16H25NO9	3.1597	0.0452925	-	65.7	6.05884	51771-52-9	-	-	-	-	-	-	Organic oxygen compounds	Organooxygen compounds	Carbohydrates and carbohydrate conjugates	5.5218	5.5874	5.5582	5.563	5.7839	5.7393	5.807	5.6619	5.7321	5.633	5.7414	5.7948	5.7199	5.7502	5.7089	5.7847	5.7646	5.7928	5.7788	5.7365	5.7707	5.8027	5.8232	5.7916	5.7868	5.7962
neg_2368	Dopamine glucuronide	metab_11052	-	HMDB0010329	310.093	neg	M-H2O-H	C14H19NO8	3.2013	0.0255205	-	50.9	0.050143	38632-24-5	-	-	-	-	-	-	Organic oxygen compounds	Organooxygen compounds	Carbohydrates and carbohydrate conjugates	4.3642	4.4644	4.5767	4.4274	4.0572	3.3448	4.0076	3.3352	3.7887	4.2504	4.4401	3.9221	4.5058	4.5224	4.4585	4.8974	4.9095	4.8311	4.8358	4.8207	5.0752	5.2584	5.0836	5.1439	5.2498	5.3009
neg_2399	3,4,5-trihydroxy-6-({5-hydroxy-11-methoxy-16,18-dioxo-6,8,19-trioxapentacyclo[10.7.0.0,.0,.0,]nonadeca-1(12),2(9),10,13(17)-tetraen-4-yl}oxy)oxane-2-carboxylic acid	metab_11083	-	HMDB0126047	503.083	neg	M-H2O-H	C23H22O14	3.2997	0.0730255	-	76.6	0.724425	-	-	-	-	-	-	-	Phenylpropanoids and polyketides	Coumarins and derivatives	Furanocoumarins	5.3556	5.3293	5.5475	5.3647	5.1957	5.2204	5.2174	5.3307	5.1769	5.054	5.3619	5.3913	5.2967	5.3331	5.3839	5.1456	5.1586	5.2376	5.143	5.1888	5.203	5.0226	5.1845	5.1024	5.1765	5.0944
neg_2402	Threoninyl-Isoleucine	metab_11086	-	HMDB0029064	231.135	neg	M-H	C10H20N2O4	3.3065	0.0342455	-	65.2	-1.1522	-	-	-	-	-	-	-	Organic acids and derivatives	Carboxylic acids and derivatives	Amino acids, peptides, and analogues	5.1554	4.9979	5.0126	5.0987	5.0966	4.5277	4.5213	4.3651	4.4194	4.3644	4.6059	4.5165	4.4677	4.4604	4.4554	4.4039	4.4835	4.4554	4.4691	4.4882	4.5107	4.497	4.5536	4.53	4.5487	4.493
neg_2407	Pisumionoside	metab_11091	-	HMDB0039947	449.203	neg	M+FA-H	C19H32O9	3.3134	0.0165687	-	80.5	0.283623	371113-06-3	-	-	-	-	-	-	Lipids and lipid-like molecules	Prenol lipids	Terpene glycosides	6.7106	6.6732	6.5757	6.7746	6.5712	3.6138	3.5134	3.3948	3.3077	3.3363	3.3232	3.3188	3.3149	3.3185	3.3272	3.3711	3.3531	3.3541	3.4134	3.3622	3.3907	3.3861	3.3742	3.3935	3.3844	3.3899
neg_2426	6-Hydroxy-2-bornanone glucoside	metab_11110	-	HMDB0034558	375.166	neg	M+FA-H	C16H26O7	3.3691	0.0702087	-	57.1	0.281791	155551-16-9	-	-	-	-	-	-	Lipids and lipid-like molecules	Prenol lipids	Terpene glycosides	5.6428	5.6491	5.5647	5.7852	5.5748	4.7515	4.7531	4.7419	4.7449	4.7242	4.7605	4.7561	4.7522	4.7557	4.7645	4.8084	4.7904	4.7913	4.7906	4.7995	4.828	4.8234	4.8114	4.8308	4.8217	4.8272
neg_2448	(3,4,5,6-tetrahydroxyoxan-2-yl)methyl 3-(4-hydroxy-3-methoxyphenyl)prop-2-enoate	metab_11132	-	HMDB0125101	355.104	neg	M-H	C16H20O9	3.4447	0.0448053	-	60.9	0.357962	-	-	-	-	-	-	-	Phenylpropanoids and polyketides	Cinnamic acids and derivatives	Hydroxycinnamic acids and derivatives	5.8259	5.7777	5.7964	5.8026	5.8552	4.3929	4.2407	4.1114	4.1848	3.9583	4.2557	3.9664	4.0835	4.1695	3.9848	4.0646	4.1029	4.1674	4.1149	4.255	3.9361	3.9529	4.2044	4.1737	4.0759	3.959
neg_2458	Sonchuionoside C	metab_11142	-	HMDB0035212	421.167	neg	M+Cl	C19H30O8	3.4722	0.0654876	-	52	8.37634	126585-76-0	-	-	-	-	-	-	Lipids and lipid-like molecules	Prenol lipids	Terpene glycosides	5.9173	5.9828	5.8959	5.9995	6.0435	4.7398	4.8682	4.8737	4.9356	4.9772	4.3213	3.9627	3.9331	4.2339	2.4343	2.4443	2.4423	2.8337	2.4266	3.44	2.4638	3.123	2.9746	2.9494	2.5669	2.463
neg_2498	Indacaterol-8-O-glucuronide	metab_11182	-	HMDB0061152	605.186	neg	M+K-2H	C30H36N2O9	3.6153	0.135851	-	52	-8.11407	-	-	-	-	-	-	-	Organic oxygen compounds	Organooxygen compounds	Carbohydrates and carbohydrate conjugates	5.5313	5.6093	5.5565	5.6824	5.5126	3.5649	3.5665	3.9119	3.5583	3.5376	3.5739	3.5695	3.5656	3.5691	3.5779	3.6218	3.6038	3.6047	3.604	3.6129	3.6414	3.6368	3.6248	3.6442	3.6351	3.6406
neg_2507	Gentisic acid	metab_11191	C00628	HMDB0059999;HMDB0000152	153.019	neg	M-H	C7H6O4	3.6591	0.0657949	73.9	-	-5.13034	490-79-9	-	-	map00626;map00362;map01100;map01120;map00350	Naphthalene degradation; Benzoate degradation; Metabolic pathways; Microbial metabolism in diverse environments; Tyrosine metabolism	Metabolism;Metabolism;Metabolism;Metabolism;Metabolism	Xenobiotics biodegradation and metabolism;Xenobiotics biodegradation and metabolism;Global and overview maps;Global and overview maps;Amino acid metabolism	Benzenoids	Benzene and substituted derivatives	Benzoic acids and derivatives	4.3751	4.4537	4.4037	4.4116	4.3634	4.6335	4.5609	4.7339	4.377	4.411	4.6683	4.6554	4.6992	4.6255	4.718	4.8051	4.8071	4.8718	4.8409	4.8735	4.9552	4.8561	4.7238	4.7207	4.7917	5.0576
neg_2515	3,4,5-trihydroxy-6-{[7-hydroxy-2-(4-hydroxy-3-methoxyphenyl)-3-{[3,4,5-trihydroxy-6-(hydroxymethyl)oxan-2-yl]oxy}-8aH-chromen-5-yl]oxy}oxane-2-carboxylic acid	metab_11199	-	HMDB0128115	661.14	neg	M+Na-2H	C28H32O17	3.6796	0.0184265	-	79.6	2.02315	-	-	-	-	-	-	-	Organic oxygen compounds	Organooxygen compounds	Carbohydrates and carbohydrate conjugates	6.5232	6.4657	6.4124	6.4819	6.3246	6.4801	6.4236	6.5369	6.3338	6.3794	6.6153	6.581	6.501	6.5484	6.6355	6.4672	6.5118	6.5126	6.4735	6.442	6.3978	6.2276	6.3256	6.4128	6.1586	5.0961
neg_2538	Hydroxyphenyllactic acid	metab_11222	C03672	HMDB0000755	181.05	neg	M-H	C9H10O4	3.769	0.0324776	51.8	-	-3.5395	306-23-0	-	-	-	-	-	-	Phenylpropanoids and polyketides	Phenylpropanoic acids	Not Available	4.631	4.6259	4.5041	4.5619	4.6239	5.5926	5.678	5.6791	5.4111	5.5685	5.6606	5.6996	5.6579	5.6991	5.7104	5.5122	5.5384	5.5056	5.4763	5.569	5.5286	5.504	5.4251	5.454	5.7036	5.5541
neg_2569	Abscisic alcohol 11-glucoside	metab_11253	-	HMDB0039636	457.208	neg	M+FA-H	C21H32O8	3.8757	0.0450594	-	80.2	0.638898	145153-00-0	-	-	-	-	-	-	Lipids and lipid-like molecules	Prenol lipids	Terpene glycosides	5.8408	5.8947	5.8246	6.0422	5.6963	3.245	3.2466	3.2354	3.2385	3.2177	3.254	3.2496	3.2457	3.2492	3.258	3.3019	3.2839	3.2848	3.2841	3.293	3.3215	3.3169	3.3049	3.3243	3.3152	3.3207
neg_2579	Vanillin	metab_11263	C00755	HMDB0012308	151.039	neg	M-H	C8H8O3	3.9155	0.0595564	75	-	-5.24909	121-33-5	-	-	map01100;map01110;map01120;map00627;map00998;map01063;map01061	Metabolic pathways; Biosynthesis of secondary metabolites; Microbial metabolism in diverse environments; Aminobenzoate degradation; Biosynthesis of various secondary metabolites - part 2; Biosynthesis of alkaloids derived from shikimate pathway; Biosynthesis of phenylpropanoids	Metabolism;Metabolism;Metabolism;Metabolism;Metabolism;Metabolism;Metabolism	Global and overview maps;Global and overview maps;Global and overview maps;Xenobiotics biodegradation and metabolism;Biosynthesis of other secondary metabolites;Chemical structure transformation maps;Chemical structure transformation maps	Benzenoids	Phenols	Methoxyphenols	4.5622	4.5636	4.5104	4.4706	4.672	5.1591	5.1551	5.1078	5.0361	5.1047	5.0387	5.087	4.9921	4.9776	5.037	4.9293	4.9465	4.9209	4.9361	4.9865	4.9424	4.9321	4.937	4.9293	4.9225	4.8886
neg_2597	Meloside L	metab_11280	-	HMDB0029478;LMPK12110497	609.147	neg	M-H	C27H30O16	3.9568	0.0491057	-	72	0.836672	55196-48-0	-	-	-	-	-	-	Phenylpropanoids and polyketides	Flavonoids	Flavonoid glycosides	5.5261	5.4015	5.5231	5.6625	4.9918	5.6515	5.4112	5.3374	5.3941	5.3317	5.8907	6.0429	5.814	5.8455	6.0625	5.7893	5.8744	5.9428	5.8374	5.8605	5.7471	5.569	5.9849	5.8409	5.8754	5.1745
neg_2633	1-alkyl-2-acylglycerophosphoethanolamine	metab_11316	C04475	HMDB0062185	278.019	neg	M+Cl	C6H14NO7P	4.0735	0.0417788	-	57.1	-3.72223	-	-	-	map00565;map01100	Ether lipid metabolism; Metabolic pathways	Metabolism;Metabolism	Lipid metabolism;Global and overview maps	Lipids and lipid-like molecules	Glycerophospholipids	Glycerophosphoethanolamines	5.4291	5.4498	5.4487	5.4043	5.4607	5.6366	5.6762	5.6401	5.6447	5.5862	5.6987	5.7219	5.6904	5.7735	5.7399	5.7857	5.731	5.7613	5.7152	5.7542	5.7945	5.748	5.7491	5.7511	5.7373	5.7329
neg_2639	N-Acetyl-D-phenylalanine	metab_11322	C05620	-	206.082	neg	M-H	C11H13NO3	4.0871	0.00647336	65.9	-	-2.47726	-	-	-	map01100;map00360	Metabolic pathways; Phenylalanine metabolism	Metabolism;Metabolism	Global and overview maps;Amino acid metabolism	-	-	-	5.9576	6.1035	5.9831	6.0849	5.9902	6.0733	5.9916	5.855	5.9161	5.8977	5.9794	5.8922	5.9346	5.9596	5.9181	5.9933	5.9595	5.9374	5.9103	5.9591	5.9189	5.9362	5.9581	5.9336	5.9228	5.9474
neg_2644	Moringyne	metab_11327	-	HMDB0031724	357.119	neg	M+FA-H	C15H20O7	4.1077	0.156175	-	60.9	1.02142	97400-73-2	-	-	-	-	-	-	Organic oxygen compounds	Organooxygen compounds	Carbohydrates and carbohydrate conjugates	5.0562	5.2299	5.199	5.1815	5.2042	0.8375	0.9298	1.0663	0.1857	0.1786	1.8144	0.1896	3.6355	0.1895	0.3284	0.2088	0.5748	0.2024	3.4829	0.6381	0.2164	2.6498	0.21	3.3279	2.9541	0.2161
neg_2645	Acetyl-DL-Leucine	metab_11328	C02710	HMDB0011756	172.097	neg	M-H	C8H15NO3	4.1146	0.0182529	78.7	-	-4.03683	-	-	-	-	-	-	-	Organic acids and derivatives	Carboxylic acids and derivatives	Amino acids, peptides, and analogues	4.971	5.109	5.0513	5.0639	5.1097	6.2294	6.1734	6.0169	6.1055	6.0768	6.2977	6.3354	6.3231	6.3287	6.3425	6.5129	6.4938	6.4961	6.4829	6.5188	6.6784	6.6712	6.7032	6.665	6.568	6.697
neg_2666	Eremopetasidione	metab_11349	-	HMDB0040778	281.139	neg	M+FA-H	C14H20O3	4.1961	0.0285089	-	63.4	-0.38023	163135-94-2	-	-	-	-	-	-	Lipids and lipid-like molecules	Prenol lipids	Sesquiterpenoids	3.925	4.2482	4.4052	3.2218	2.9835	5.0346	5.1954	4.8367	5.4452	4.9999	5.0226	5.4092	5.2123	5.2087	5.1779	5.343	5.3391	5.2662	5.3393	5.4262	5.7223	5.6454	5.6417	5.5474	5.5606	5.6934
neg_2708	Valtrate	metab_11391	C09801	HMDB0034493	233.043	neg	M+Na-2H	C10H12O5	4.3366	0.0215989	-	50.5	-1.38894	18296-44-1	-	-	-	-	-	-	Lipids and lipid-like molecules	Prenol lipids	Monoterpenoids	4.9001	4.9208	4.9197	4.8753	4.9317	5.5246	5.6043	5.509	5.556	5.4524	5.4615	5.5929	5.3735	5.386	5.4327	5.1823	5.1847	5.2048	5.1236	5.1513	5.6596	5.5817	5.5645	5.4775	5.578	6.1534
neg_2721	3-Hydroxy-beta-ionol 3-[glucosyl-(1->6)-glucoside]	metab_11404	-	HMDB0037527	571.219	neg	M+K-2H	C25H42O12	4.371	0.0365611	-	63.3	4.83499	137606-56-5	-	-	-	-	-	-	Lipids and lipid-like molecules	Prenol lipids	Terpene glycosides	3.73	4.0771	2.0461	4.2803	4.0697	6.1829	6.0608	6.4295	5.5031	5.7544	6.0247	6.0853	6.2563	6.2247	6.2142	6.3631	6.3425	6.3958	6.3586	6.3523	6.3768	6.3864	6.3319	6.3157	6.3218	5.9826
neg_2753	Nigellic acid	metab_11436	-	HMDB0036094	279.124	neg	M-H	C15H20O5	4.4466	0.0118222	-	53	-0.242289	91897-25-5	-	-	-	-	-	-	Lipids and lipid-like molecules	Prenol lipids	Sesquiterpenoids	5.335	5.4607	5.3899	5.311	5.2798	6.0057	6.0107	5.8854	5.9771	5.9242	6.0141	5.9936	5.9726	6.0009	6.011	6.0586	6.017	6.0399	6.0396	6.0294	6.1236	6.1482	6.1401	6.1132	6.0734	6.0822
neg_2757	(R)-Pelletierine	metab_11440	-	HMDB0030324	186.113	neg	M+FA-H	C8H15NO	4.4535	0.0158147	-	57.9	-4.27409	2858-66-4	-	-	-	-	-	-	Organoheterocyclic compounds	Piperidines	Not Available	4.4786	4.4058	4.2316	4.4509	4.5233	4.6068	4.6497	4.3509	4.7329	4.6095	4.8983	4.67	4.7908	4.8273	4.8696	5.8557	5.7507	5.7975	5.7954	5.8018	6.8129	6.7715	6.6322	6.7881	6.6166	6.7635
neg_2800	1-(4-hydroxyphenyl)pentan-3-one	metab_11483	-	HMDB0132981	177.091	neg	M-H	C11H14O2	4.6151	0.13278	-	50.1	-3.89972	-	-	-	-	-	-	-	Benzenoids	Phenols	1-hydroxy-2-unsubstituted benzenoids	5.1544	4.5628	4.1566	2.6952	3.2669	2.6301	3.5947	2.9181	4.4713	2.7931	2.6391	2.6347	2.6308	2.7164	2.826	2.6869	2.8781	2.6699	2.6691	3.1932	3.4523	3.5966	3.5869	2.9634	3.2195	2.7057
neg_2806	Isocolumbin	metab_11489	C17508	HMDB0036837	339.124	neg	M-H2O-H	C20H22O6	4.6289	0.0895828	-	84.4	-0.67817	471-54-5	-	-	-	-	-	-	Organoheterocyclic compounds	Naphthopyrans	Not Available	4.9678	5.2567	5.3866	5.0726	5.0974	4.4616	3.2959	4.5794	4.6906	4.8286	4.5165	3.2989	5.0089	4.587	4.3028	4.2291	3.7432	3.9557	4.7153	4.7791	3.3708	3.8019	3.3542	3.5092	4.8855	3.37
neg_2821	2-Feruloyl-1-sinapoylgentiobiose	metab_11504	-	HMDB0030334	705.205	neg	M-H2O-H	C33H40O18	4.6835	0.114042	-	67.8	1.60893	-	-	-	-	-	-	-	Phenylpropanoids and polyketides	Cinnamic acids and derivatives	Hydroxycinnamic acids and derivatives	4.7119	5.7311	6.1058	5.5427	5.0806	5.1336	4.1514	3.6245	4.6061	5.7838	5.5118	3.6387	5.7364	3.6384	5.2058	3.6911	5.3132	3.674	3.9183	5.7277	5.2227	4.9764	4.0166	4.3726	5.6172	3.9632
neg_2908	3b,6a-Dihydroxy-alpha-ionol 9-[apiosyl-(1->6)-glucoside]	metab_11591	-	HMDB0041577	555.224	neg	M+Cl	C24H40O12	5.025	0.0181063	-	75.1	5.08408	177261-72-2	-	-	-	-	-	-	Lipids and lipid-like molecules	Fatty Acyls	Fatty acyl glycosides	3.6038	3.7211	4.2275	3.7106	4.0387	6.0602	5.9598	6.3443	5.4709	5.7105	5.8814	5.854	6.073	5.9823	6.0126	6.119	6.1084	6.1495	6.1377	6.1185	6.1892	6.2046	6.0809	6.0097	6.0507	5.6819
neg_2911	4,5-Dihydrovomifoliol	metab_11594	-	HMDB0040615	271.155	neg	M+FA-H	C13H22O3	5.0373	0.0188145	-	64.9	-0.00792486	142173-08-8	-	-	-	-	-	-	Lipids and lipid-like molecules	Prenol lipids	Sesquiterpenoids	6.0926	6.0758	6.0852	6.0461	6.1961	6.2623	6.342	6.2993	6.331	6.2552	6.3285	6.3416	6.3034	6.3413	6.3467	6.3264	6.3137	6.3186	6.3229	6.3037	6.3097	6.3559	6.3689	6.3047	6.2842	6.3943
neg_2919	Cinnamoside	metab_11602	-	HMDB0038923	553.208	neg	M+Cl	C24H38O12	5.0712	0.0442393	-	74.4	5.20926	108567-70-0	-	-	-	-	-	-	Lipids and lipid-like molecules	Prenol lipids	Terpene glycosides	3.3459	3.2988	3.8173	4.0114	3.8482	5.6528	5.2589	5.9834	4.5654	5.0115	5.1399	5.0926	5.4392	5.2417	5.2087	5.2011	5.2101	5.3203	5.2969	5.3092	5.6929	5.3205	5.174	4.7727	5.1607	4.5526
neg_2936	Vanilloloside	metab_11619	-	HMDB0032013	297.098	neg	M-H2O-H	C14H20O8	5.153	0.137518	-	67.3	-0.287897	74950-96-2	-	-	-	-	-	-	Organic oxygen compounds	Organooxygen compounds	Carbohydrates and carbohydrate conjugates	3.5306	2.9609	2.7428	2.6985	2.7548	4.5585	4.7181	4.6571	4.7712	5.4455	5.0267	2.9119	5.2927	4.766	4.9441	4.3795	4.8406	2.9471	4.3117	4.5802	3.3521	2.9792	3.1106	3.3836	4.1626	2.9829
neg_2945	13-Nor-6-eremophilene-8,11-dione	metab_11628	-	HMDB0037606	265.144	neg	M+FA-H	C14H20O2	5.1939	0.097795	-	70.6	-0.156231	348119-85-7	-	-	-	-	-	-	Lipids and lipid-like molecules	Prenol lipids	Sesquiterpenoids	2.6848	2.7054	2.7044	2.6601	2.7164	3.5575	3.557	3.409	3.8568	3.2512	3.6287	3.6279	3.6079	3.8741	3.7944	4.0897	4.2684	4.0955	4.2737	4.3311	4.8166	4.7602	4.6612	4.6841	4.7203	4.8287
neg_2968	N-acetyltryptophan	metab_11651	-	HMDB0013713	291.099	neg	M+FA-H	C13H14N2O3	5.2832	0.106487	-	72.4	-0.293324	1218-34-4	-	-	-	-	-	-	Organic acids and derivatives	Carboxylic acids and derivatives	Amino acids, peptides, and analogues	2.9253	2.946	2.945	2.9006	2.9569	4.0354	4.3609	3.8027	3.103	3.0823	4.2613	4.4513	4.5192	4.6784	4.4986	5.084	5.0138	4.8861	5.0206	5.0942	4.9668	4.9548	4.8548	5.098	5.0006	4.3149
neg_2995	8-(1,2-dihydroxypropan-2-yl)-2-oxo-2H,8H,9H-furo[2,3-h]chromen-9-yl 3-methylbut-2-enoate	metab_11678	-	HMDB0128915	341.103	neg	M-H2O-H	C19H20O7	5.4077	0.0569007	-	52.8	-0.721884	-	-	-	-	-	-	-	Phenylpropanoids and polyketides	Coumarins and derivatives	Furanocoumarins	3.9604	3.652	4.3607	2.9974	4.019	5.1382	5.1691	5.396	4.7643	4.8973	5.1728	5.2238	5.2209	5.2416	5.2183	5.1592	5.1796	5.2729	5.1856	5.2372	4.9703	4.8477	5.0785	4.7135	5.0833	4.3259
neg_3002	4,5-Dihydroniveusin A	metab_11685	-	HMDB0032844	441.177	neg	M+FA-H	C20H28O8	5.4397	0.180794	-	67.8	-0.294034	98204-96-7	-	-	-	-	-	-	Lipids and lipid-like molecules	Prenol lipids	Terpene lactones	5.5658	5.509	5.4755	5.527	5.5047	4.4348	4.4364	4.4252	4.4282	4.4075	4.4438	4.4394	4.4355	4.439	4.4478	4.4917	4.4737	4.4746	4.4739	4.4828	4.5113	4.5067	4.4947	4.5141	4.505	4.5105
neg_3008	5-Methoxycanthin-6-one	metab_11691	-	HMDB0030227	271.05	neg	M+Na-2H	C15H10N2O2	5.4672	0.0385012	-	57.2	4.40168	15071-56-4	-	-	-	-	-	-	Alkaloids and derivatives	Indolonaphthyridine alkaloids	Not Available	4.3076	4.427	4.3409	4.4194	4.4674	4.9734	4.9795	4.7785	4.9439	4.893	4.8605	4.8494	4.8104	4.8735	4.845	4.9069	4.8597	4.8909	4.9064	4.8266	4.9158	4.9563	4.9361	4.9111	4.8434	4.9461
neg_3014	Petasitenine	metab_11697	C10359	HMDB0030328	418.13	neg	M+K-2H	C19H27NO7	5.4878	0.0755266	-	51.9	6.29068	60102-37-6	-	-	-	-	-	-	Organoheterocyclic compounds	Azaspirodecane derivatives	Not Available	3.798	3.8187	3.8176	3.7732	3.8296	5.2742	5.0322	4.928	3.9758	4.6183	4.4086	5.1673	5.1068	5.4921	5.1477	5.5474	5.1588	5.0205	5.0874	5.2255	4.6927	5.1444	4.8886	4.8169	4.7498	4.0771
neg_3039	(S)-9-Hydroxy-10-undecenoic acid	metab_11722	-	LMFA01050436;HMDB0032662	245.139	neg	M+FA-H	C11H20O3	5.584	0.0118152	-	75.4	-1.25493	-	-	-	-	-	-	-	Organic acids and derivatives	Hydroxy acids and derivatives	Medium-chain hydroxy acids and derivatives	5.7296	5.5726	5.5755	5.6764	5.6173	6.3451	6.3325	6.2634	6.3087	6.2713	6.4962	6.3385	6.4282	6.4554	6.4469	6.7087	6.6864	6.6605	6.7106	6.6828	6.8797	6.9219	6.9121	6.8691	6.8966	6.9265
neg_3062	Riesling acetal	metab_11745	-	HMDB0037562	271.155	neg	M+FA-H	C13H22O3	5.694	0.0121739	-	50.5	-0.000610766	-	-	-	-	-	-	-	Organoheterocyclic compounds	Tetrahydrofurans	Not Available	6.1074	6.1319	6.1289	6.1246	6.1583	6.2827	6.3543	6.3173	6.3651	6.2845	6.3786	6.3408	6.3448	6.3697	6.3751	6.3518	6.3438	6.3536	6.3486	6.3173	6.3038	6.3423	6.3692	6.2886	6.2773	6.4089
neg_3071	5-Megastigmen-7-yne-3,9-diol 3-glucoside	metab_11754	-	HMDB0032842	415.198	neg	M+FA-H	C19H30O7	5.7352	0.063647	-	52.3	0.481101	62512-27-0	-	-	-	-	-	-	Organic oxygen compounds	Organooxygen compounds	Carbohydrates and carbohydrate conjugates	5.8484	5.8793	5.8044	5.9249	5.6795	3.539	3.5173	4.6179	2.9776	3.5108	3.6158	2.7513	3.4066	3.7866	2.8808	2.8035	2.7856	2.8721	3.2898	3.392	2.8231	3.0848	2.8066	3.5267	2.8168	2.8223
neg_3077	(1'R)-Nepetalic acid	metab_11760	-	HMDB0036117	229.108	neg	M+FA-H	C10H16O3	5.7627	0.023327	-	56	-1.84387	21651-54-7	-	-	-	-	-	-	Lipids and lipid-like molecules	Prenol lipids	Monoterpenoids	4.9922	5.0624	4.9494	5.0199	4.9677	5.1274	5.1154	5.075	5.248	5.1191	5.1342	5.0983	5.0629	5.0682	5.0688	4.9728	5.0316	5.0661	5.0185	4.9802	4.9369	4.8919	4.9545	4.9564	4.8617	4.7616
neg_3142	Linalool oxide D 3-[apiosyl-(1->6)-glucoside]	metab_11825	-	HMDB0031367	463.219	neg	M-H	C21H36O11	5.9895	0.0205345	-	64.4	0.71194	-	-	-	-	-	-	-	Organic oxygen compounds	Organooxygen compounds	Carbohydrates and carbohydrate conjugates	6.5158	6.5863	6.5242	6.7016	6.2744	3.6976	4.1941	4.0476	4.9354	5.1857	4.8646	4.4184	5.1002	4.851	3.8478	4.3039	4.9106	4.3034	4.5394	5.021	4.273	3.9581	4.3845	4.278	5.0449	3.4606
neg_3153	(4S,8R)-8,9-Dihydroxy-p-menth-1(6)-en-2-one	metab_11836	-	HMDB0039052	229.108	neg	M+FA-H	C10H16O3	6.0102	0.0122452	-	66.1	-1.66299	402593-42-4	-	-	-	-	-	-	Lipids and lipid-like molecules	Prenol lipids	Monoterpenoids	5.2662	5.3081	5.2325	5.2359	5.2205	5.2862	5.1701	5.1549	5.3482	5.1896	5.2047	5.1807	5.053	5.0721	5.1106	4.8667	4.9455	4.93	4.9338	4.9147	4.6152	4.5817	4.6008	4.5927	4.5395	4.4964
neg_3169	Dynorphin B (6-9)	metab_11852	-	HMDB0012937	626.319	neg	M+Na-2H	C26H43N11O6	6.0308	0.156357	-	64.9	8.19648	-	-	-	-	-	-	-	Organic acids and derivatives	Carboxylic acids and derivatives	Amino acids, peptides, and analogues	5.7372	5.8117	5.8098	5.9073	5.5689	3.5913	4.1487	3.9564	4.1845	4.1051	3.6992	1.2125	1.8404	3.6686	1.2204	1.2618	1.2448	1.2457	1.245	1.2534	1.2803	1.276	1.2647	1.283	1.4195	1.427
neg_3175	9-Oxo-nonanoic acid	metab_11858	C16322	LMFA01060160;HMDB0094711	343.212	neg	2M-H	C9H16O3	6.0514	0.00942412	-	54.1	-0.373062	-	-	-	map00592;map01110	alpha-Linolenic acid metabolism; Biosynthesis of secondary metabolites	Metabolism;Metabolism	Lipid metabolism;Global and overview maps	Lipids and lipid-like molecules	Fatty Acyls	Fatty acids and conjugates	6.9096	7.0011	6.9535	6.9602	6.9022	7.4546	7.5944	7.3368	7.5492	7.477	7.3244	7.2963	7.2868	7.269	7.27	7.2233	7.2488	7.2361	7.2372	7.214	7.2322	7.2562	7.3266	7.2428	7.2415	7.2195
neg_3233	2,2'-(3-methylcyclohexane-1,1-diyl)diacetic acid	metab_11916	-	-	213.113	neg	M-H	C11H18O4	6.1276	0.0487585	59.7	-	-1.96838	-	-	-	-	-	-	-	-	-	-	5.6687	5.6627	5.6228	5.676	5.5927	5.8869	5.8745	5.8327	5.949	5.8713	5.8589	5.891	5.8086	5.8406	5.8241	5.7105	5.7715	5.7587	5.7103	5.6813	5.5692	5.5564	5.5756	5.5429	5.5209	5.4053
neg_3244	Arginyl-Gamma-glutamate	metab_11927	-	HMDB0028723	283.155	neg	M-H2O-H	C11H22N6O4	6.1413	0.0751665	-	57.7	8.65501	-	-	-	-	-	-	-	Organic acids and derivatives	Carboxylic acids and derivatives	Amino acids, peptides, and analogues	4.946	5.0008	4.9007	4.8277	4.7833	5.1867	5.2139	5.0455	5.1407	5.0895	5.1099	5.096	5.1403	5.0351	5.1033	5.1091	5.1303	5.2056	5.1161	5.1121	5.1899	5.2675	5.2387	5.2331	5.1408	5.2698
neg_3247	19(R)-hydroxy-PGF1alpha	metab_11930	-	-	371.244	neg	M-H	C20H36O6	6.1413	0.0533357	56	-	-0.253887	-	-	-	-	-	-	-	-	-	-	4.4967	4.6721	4.7116	4.4135	4.1119	5.7017	5.7503	5.6319	5.7215	5.6566	5.6631	5.648	5.6712	5.6733	5.6871	5.6993	5.7036	5.7085	5.7203	5.7081	5.7571	5.817	5.8447	5.7534	5.8148	5.8084
neg_3293	Nicotine glucuronide	metab_11976	-	HMDB0001272	721.288	neg	2M+FA-H	C16H22N2O6	6.2032	0.193337	-	51.2	-8.99361	152306-59-7	-	-	-	-	-	-	Organic oxygen compounds	Organooxygen compounds	Carbohydrates and carbohydrate conjugates	5.4433	5.5812	5.8668	5.5739	5.0849	3.9052	4.2239	4.4519	4.1898	4.4815	4.7965	4.8029	3.9059	4.8021	4.4649	3.9621	3.9441	4.4791	3.9443	4.2337	3.9817	3.9771	3.9651	3.9845	3.9754	3.9809
neg_3306	N-Jasmonoylisoleucine	metab_11989	C18699	HMDB0029391	322.202	neg	M-H	C18H29NO4	6.2236	0.0338795	-	56	0.180141	120330-93-0	-	-	map04075	Plant hormone signal transduction	Environmental Information Processing	Signal transduction	Organic acids and derivatives	Carboxylic acids and derivatives	Amino acids, peptides, and analogues	5.811	5.6168	5.7117	5.5801	5.755	6.1218	6.1229	6.166	6.1269	6.1099	6.0257	6.1221	6.0836	6.104	6.0844	6.074	6.072	6.0553	6.0596	6.0455	5.8645	5.9977	6.1055	5.9231	5.9399	6.0232
neg_3313	Corchorifatty acid D	metab_11996	-	HMDB0033243	307.192	neg	M-H	C18H28O4	6.2373	0.0099471	-	78.3	0.205971	-	-	-	-	-	-	-	Lipids and lipid-like molecules	Fatty Acyls	Lineolic acids and derivatives	7.0074	7.0647	7.0507	7.0521	6.8521	7.188	7.2198	7.0961	7.3205	7.2538	7.1163	7.1967	7.0788	7.0581	7.1068	7.0017	7.086	7.1093	7.0429	7.0044	6.9466	6.8854	7.0421	6.8874	6.8245	6.5209
neg_3357	6alpha-Carissanol	metab_12040	-	HMDB0035313;HMDB0035309	251.165	neg	M-H	C15H24O3	6.2853	0.105346	-	75.7	-0.7895	99957-10-5	-	-	-	-	-	-	Lipids and lipid-like molecules	Prenol lipids	Sesquiterpenoids	4.7689	4.8555	4.6974	4.8429	4.5749	5.2692	5.2476	5.1941	5.2634	5.2085	5.1966	5.2352	5.1756	5.1491	5.1936	5.2084	5.2194	5.2506	5.228	5.1797	5.3576	5.2785	5.3778	5.2167	5.2618	5.1493
neg_3427	12-epi Leukotriene B3	metab_12110	-	-	337.239	neg	M-H	C20H34O4	6.3677	0.0192714	61.4	-	0.265372	-	-	-	-	-	-	-	-	-	-	5.1964	5.3151	5.3442	5.1538	5.1323	5.7008	5.6168	5.7041	5.7887	5.7629	5.7518	5.7548	5.741	5.7135	5.7826	5.9452	5.8924	5.9144	5.922	5.8675	5.952	6.0083	6.0596	6.0189	5.9783	6.0616
neg_3467	5(S)-HETE	metab_12150	C04805	HMDB0011134	319.228	neg	M-H	C20H32O3	6.4364	0.0186502	55	-	-0.371694	-	-	-	map00590;map04750	Arachidonic acid metabolism; Inflammatory mediator regulation of TRP channels	Metabolism;Organismal Systems	Lipid metabolism;Sensory system	Lipids and lipid-like molecules	Fatty Acyls	Eicosanoids	4.9774	4.8533	5.0759	4.9472	4.9392	5.5879	5.5718	5.474	5.4337	5.5079	5.3762	5.5578	5.4495	5.4014	5.429	5.6795	5.6197	5.6153	5.7378	5.5644	5.656	5.7059	5.8981	5.7062	5.688	5.6664
neg_3517	LysoPC(16:0)	metab_12200	C04230	HMDB0010382;HMDB0240262	540.331	neg	M+FA-H	C24H50NO7P	6.5598	0.0989852	-	62.8	1.03321	-	Lipids	Phospholipids	map00564;map05231	Glycerophospholipid metabolism; Choline metabolism in cancer	Metabolism;Human Diseases	Lipid metabolism;Cancer: overview	Lipids and lipid-like molecules	Glycerophospholipids	Glycerophosphocholines	5.8186	5.9747	6.0955	5.9472	5.779	5.1	5.0345	5.1263	5.142	5.4507	5.2425	4.4308	5.4748	5.2556	5.0822	5.0274	5.0064	4.3319	4.8577	5.0848	4.7805	4.8762	4.4537	4.1606	5.4503	4.0645
neg_3526	LysoPC(18:1(9Z))	metab_12209	-	HMDB0002815;HMDB0061701	566.347	neg	M+FA-H	C26H52NO7P	6.5736	0.234221	-	96	1.08712	-	-	-	-	-	-	-	Lipids and lipid-like molecules	Glycerophospholipids	Glycerophosphocholines	4.8837	5.1298	5.5985	4.7089	4.7393	4.496	4.2775	4.4619	4.3941	5.3738	4.8501	4.1705	5.4171	4.9936	4.1789	4.4935	4.8587	4.911	4.6221	5.2064	4.2424	4.4861	4.2258	4.8164	5.8294	4.2416
neg_3583	DG(8:0/8:0/0:0)	metab_12266	-	HMDB0116368	389.255	neg	M+FA-H	C19H36O5	6.6696	0.0367961	-	55.3	0.379381	-	-	-	-	-	-	-	Lipids and lipid-like molecules	Glycerolipids	Diradylglycerols	4.6019	4.8693	4.5833	4.8625	4.5563	6.2395	6.2514	6.1505	6.2015	6.2001	6.2433	6.2738	6.2233	6.2656	6.2777	6.2921	6.28	6.3252	6.2611	6.3005	6.339	6.3482	6.4052	6.3396	6.3834	6.313
neg_3606	Tetradecanedioic acid	metab_12289	C11002	HMDB0000872;LMFA01170018	257.176	neg	M-H	C14H26O4	6.7176	0.012653	57.8	-	-0.473804	821-38-5	-	-	-	-	-	-	Lipids and lipid-like molecules	Fatty Acyls	Fatty acids and conjugates	5.947	5.7672	5.8733	5.8836	6.0912	6.0828	6.1283	6.151	6.151	6.0419	6.1496	6.1924	6.1807	6.1789	6.2215	6.2254	6.2028	6.2381	6.2541	6.2199	6.182	6.2363	6.2395	6.1855	6.2053	6.3642
neg_3644	3-carboxy-4-methyl-5-pentyl-2-furanpropanoic acid	metab_12327	-	HMDB0061643;LMFA01150047	267.124	neg	M-H	C14H20O5	6.793	0.0100064	-	71.4	-0.189053	-	-	-	-	-	-	-	Lipids and lipid-like molecules	Fatty Acyls	Fatty acids and conjugates	5.3822	5.1276	4.9507	4.9401	5.0169	6.7459	6.8967	6.7721	6.5943	6.6832	6.9768	6.9854	6.9595	7.0377	7.018	7.1289	7.1026	7.1247	7.1096	7.1376	7.1251	7.1458	7.1032	7.157	7.1167	7.123
neg_3696	Hexylresorcinol	metab_12379	-	HMDB0032567	239.129	neg	M+FA-H	C12H18O2	6.8956	0.0334302	-	53.2	-1.23958	136-77-6	-	-	-	-	-	-	Benzenoids	Phenols	Benzenediols	5.9205	5.8501	5.8338	5.8957	5.889	5.948	5.9525	5.9489	5.97	5.9208	5.8726	5.8835	5.8751	5.861	5.8942	5.8323	5.8331	5.8615	5.8702	5.8473	5.8326	5.7859	5.7802	5.8486	5.8653	5.6529
neg_3708	Frangulanine	metab_12391	C10003	HMDB0030199	521.312	neg	M+Na-2H	C28H44N4O4	6.9093	0.0384825	-	79.6	2.09037	25350-22-5	-	-	-	-	-	-	Organic acids and derivatives	Carboxylic acids and derivatives	Amino acids, peptides, and analogues	4.4532	4.6558	4.2084	4.2511	4.2204	5.7169	5.9251	5.9988	5.8429	5.8518	6.009	6.0255	6.0643	6.0443	6.0653	6.176	6.123	6.1767	6.1808	6.1607	6.1486	6.214	6.1592	6.11	6.1909	6.2338
neg_3735	Glycerophospho-N-Palmitoyl Ethanolamine	metab_12418	-	-	452.278	neg	M-H	C21H44NO7P	6.9636	0.0755451	51.3	-	0.150789	-	-	-	-	-	-	-	-	-	-	5.2965	5.3	5.4103	5.3961	5.1897	5.8661	5.7926	5.6716	5.8491	5.8295	5.4926	5.4763	5.5207	5.5393	5.4461	5.0282	4.8572	5.0239	4.7748	4.965	4.5727	4.3547	4.6675	4.0404	4.8976	1.3928
neg_3763	PG(16:0/0:0)[U]	metab_12446	-	-	483.273	neg	M-H	C22H45O9P	7.0378	0.0315236	71.2	-	0.174438	-	-	-	-	-	-	-	-	-	-	6.3201	6.446	6.5304	6.4832	6.3043	5.9321	5.938	6.0406	5.6675	6.0295	5.8565	5.4194	6.0573	5.8348	5.7036	5.7173	5.8217	5.6422	5.7745	6.0338	5.477	5.6824	5.474	5.5854	6.053	5.4641
neg_3811	Pyrophaeophorbide a	metab_12494	-	HMDB0031150	533.256	neg	M-H	C33H34N4O3	7.2741	0.109242	-	88.9	0.3961	24533-72-0	-	-	-	-	-	-	Organoheterocyclic compounds	Tetrapyrroles and derivatives	Chlorins	3.8736	3.8943	3.8932	3.8488	3.9052	4.0926	4.0596	4.0484	4.8875	4.8261	5.8939	6.0873	5.7939	5.618	6.0228	6.0883	6.17	6.2496	6.1324	6.2472	6.347	6.2835	6.2528	6.2625	6.3824	6.3773
neg_3862	1,2-Di-O-palmitoyl-3-O-(6-sulfoquinovopyranosyl)glycerol	metab_12545	-	HMDB0041202	815.5	neg	M+Na-2H	C41H78O12S	8.0751	0.0298538	-	65.9	4.87225	122991-48-4	-	-	-	-	-	-	Lipids and lipid-like molecules	Glycerolipids	Glycosylglycerols	7.7085	7.7657	7.7429	7.7564	7.733	7.3921	6.8666	6.5218	6.7462	6.4985	6.3853	6.4296	6.1273	5.8648	6.4825	6.0464	5.6145	5.403	5.996	5.4548	5.9228	5.5871	5.4144	4.8935	5.3451	5.6402
neg_4546	1-Stearoylglycerophosphoglycerol	metab_13229	-	HMDB0061697	493.294	neg	M-H2O-H	C24H49O9P	7.1793	0.29727	-	93	0.409878	-	-	-	-	-	-	-	Lipids and lipid-like molecules	Glycerophospholipids	Glycerophosphoglycerols	3.8084	3.8291	3.8281	3.7837	3.8401	3.9929	3.9945	3.9832	3.9863	3.9656	4.0018	3.9974	3.9935	3.9971	4.0058	5.0129	4.8221	4.7419	5.2584	4.9084	5.4738	5.506	5.3099	5.6009	5.4867	5.5426
neg_4581	Withangulatin A	metab_13264	-	HMDB0037383	547.235	neg	M+Na-2H	C30H38O8	7.0514	0.075205	-	90.3	7.64119	120824-03-5	-	-	-	-	-	-	Lipids and lipid-like molecules	Prenol lipids	Monoterpenoids	4.8161	4.8367	4.8357	4.7913	4.8477	5.3275	5.0021	5.0874	5.8922	5.443	5.7949	6.0319	5.8768	5.701	5.8969	6.0035	6.1273	6.1536	6.0604	6.1133	6.2233	6.1242	6.0216	6.0468	6.224	6.0963
neg_4615	Trans-Hexa-dec-2-enoic acid	metab_13298	-	HMDB0010735	275.201	neg	M+Na-2H	C16H30O2	6.9841	0.0259453	-	54.2	8.67902	-	-	-	-	-	-	-	Lipids and lipid-like molecules	Fatty Acyls	Fatty acids and conjugates	5.1026	5.2115	5.1709	5.358	4.4366	6.2912	6.3978	6.262	6.4079	6.3363	6.2398	6.2355	6.2751	6.1504	6.2167	5.9271	6.3605	6.1263	6.1772	6.0773	6.0122	6.0016	6.2513	5.9048	5.9688	5.6278
neg_4619	MG(0:0/a-17:0/0:0)[rac]	metab_13302	-	HMDB0072848	365.27	neg	M+Na-2H	C20H40O4	6.9704	0.0264043	-	78.3	6.37436	-	-	-	-	-	-	-	Lipids and lipid-like molecules	Glycerolipids	Monoradylglycerols	5.6712	5.6619	5.7282	5.7133	5.2521	6.3895	6.4045	6.2714	6.3279	6.2646	6.4616	6.5729	6.4913	6.5058	6.5959	6.6922	6.6575	6.6646	6.5857	6.6269	6.6214	6.5471	6.5934	6.7837	6.5603	6.7292
neg_4652	Ceanothine E	metab_13335	-	HMDB0029342	549.282	neg	M-H2O-H	C34H40N4O4	6.9093	0.0401819	-	51.9	-8.28123	23926-98-9	-	-	-	-	-	-	Organic acids and derivatives	Carboxylic acids and derivatives	Amino acids, peptides, and analogues	6.5527	6.2946	6.3661	6.4578	6.2918	5.9996	5.8368	5.8202	5.8812	5.9533	5.9531	5.8503	5.9503	5.8837	5.8219	5.6935	5.8058	5.8226	5.8696	5.776	5.4198	5.728	5.6688	5.5924	5.7351	5.2219
neg_4671	9,10,13-TriHOME	metab_13354	C14835	HMDB0004710	329.233	neg	M-H	C18H34O5	6.882	0.00728398	-	90.9	-0.294411	29907-57-1	-	-	map00591	Linoleic acid metabolism	Metabolism	Lipid metabolism	Lipids and lipid-like molecules	Fatty Acyls	Fatty acids and conjugates	7.5045	7.4534	7.4954	7.5811	7.7704	7.8303	7.8884	7.9132	7.9005	7.8649	7.8454	7.8199	7.8612	7.8387	7.8249	7.9025	7.8937	7.9203	7.9153	7.8995	7.9276	7.9927	7.9968	7.9324	7.9683	8.0284
neg_4673	Traumatic Acid	metab_13356	C16308	HMDB0000933;LMFA01170002	227.129	neg	M-H	C12H20O4	6.882	0.00744218	81.9	-	-1.52117	6402-36-4	-	-	map00592;map01110	alpha-Linolenic acid metabolism; Biosynthesis of secondary metabolites	Metabolism;Metabolism	Lipid metabolism;Global and overview maps	Lipids and lipid-like molecules	Fatty Acyls	Fatty acids and conjugates	6.9443	6.9426	6.9373	7.0382	6.9078	7.2505	7.2448	7.1848	7.1838	7.1965	7.1812	7.1679	7.1772	7.2092	7.2069	7.2322	7.2151	7.2137	7.2134	7.2331	7.2645	7.2673	7.2936	7.2844	7.2757	7.2829
neg_4696	Avocadene 2-acetate	metab_13379	-	LMFA05000641;HMDB0031044	373.259	neg	M+FA-H	C19H36O4	6.8479	0.0419539	-	65	-0.363071	51352-69-3	-	-	-	-	-	-	Lipids and lipid-like molecules	Fatty Acyls	Fatty alcohols	4.0628	4.3211	4.0197	4.1485	3.905	6.3178	6.3221	6.2608	6.2923	6.2945	6.3011	6.3369	6.3342	6.3264	6.3261	6.3666	6.3526	6.3799	6.3639	6.4057	6.4666	6.4471	6.489	6.4506	6.4817	6.413
neg_4777	Ganosporelactone A	metab_13460	-	HMDB0036406	533.256	neg	M+Na-2H	C30H40O7	6.6901	0.0368202	-	83.8	8.24519	138008-04-5	-	-	-	-	-	-	Lipids and lipid-like molecules	Steroids and steroid derivatives	Steroid lactones	5	5.0207	5.0197	4.9753	5.0317	5.729	5.1861	5.4256	5.7662	5.5324	6.2303	6.4237	6.1812	6.1237	6.3621	6.439	6.4766	6.5799	6.4511	6.5709	6.7058	6.5914	6.5583	6.6106	6.6902	6.7201
neg_4791	MG(0:0/14:0/0:0)	metab_13474	-	HMDB0011530	347.244	neg	M+FA-H	C17H34O4	6.6764	0.0137864	-	55.9	0.319967	-	-	-	-	-	-	-	Lipids and lipid-like molecules	Glycerolipids	Monoradylglycerols	2.6036	2.6243	2.6232	2.5789	2.6352	5.61	5.6176	5.505	5.6181	5.588	5.8397	5.8606	5.9038	5.9379	5.948	6.1883	6.1291	6.1676	6.1752	6.1584	6.2496	6.3268	6.3122	6.275	6.2746	6.4049
neg_4807	2,3-dinor Prostaglandin E1	metab_13490	-	-	325.202	neg	M-H	C18H30O5	6.6696	0.0114887	75.3	-	-0.00531901	-	-	-	-	-	-	-	-	-	-	7.3655	7.4013	7.3627	7.3763	7.1811	7.6067	7.6593	7.4877	7.7276	7.6101	7.5815	7.6062	7.4883	7.458	7.4961	7.2679	7.4063	7.3779	7.3222	7.344	7.1911	7.1259	7.218	7.1528	7.0912	6.9202
neg_4936	PE(18:2/0:0)	metab_13619	-	-	476.278	neg	M-H	C23H44NO7P	6.4844	0.0823009	93.8	-	0.29192	-	-	-	-	-	-	-	-	-	-	5.7555	5.8124	6.1215	5.7982	5.8149	5.1359	5.2665	5.3163	5.1227	5.8005	5.3846	4.4774	5.719	5.454	5.3084	5.0647	5.3165	5.0209	5.1756	5.5696	5.0505	5.1877	4.9765	5.2014	6.009	4.9786
neg_4942	Lansioside B	metab_13625	-	HMDB0035102	599.396	neg	M-H2O-H	C36H58O8	6.4707	0.095939	-	76.9	0.736586	87453-34-7	-	-	-	-	-	-	Lipids and lipid-like molecules	Prenol lipids	Terpene glycosides	5.5465	5.6473	5.7313	5.5298	4.8979	5.5143	4.9797	5.2519	5.8274	5.7475	5.5859	5.7513	5.4102	5.4537	5.5957	4.576	5.1902	5.1047	5.1279	5.1753	4.7416	4.0043	4.3259	4.4863	3.9891	3.9946
neg_4953	(+/-)5-HETrE	metab_13636	-	-	321.243	neg	M-H	C20H34O3	6.4569	0.0962562	59.1	-	-0.0661815	-	-	-	-	-	-	-	-	-	-	4.3574	4.514	4.3141	4.3598	3.9961	5.2393	5.1639	5.1018	5.4377	5.4121	5.0991	5.1701	5.1604	5.0499	5.2329	5.3205	5.3083	5.3569	5.3888	5.1918	5.3264	5.3064	5.5316	5.2817	5.3294	5.2143
neg_4973	9(S)-HODE	metab_13656	C14767	HMDB0004670	295.228	neg	M-H	C18H32O3	6.4226	0.0172624	61.4	-	-0.520257	-	-	-	map00591;map03320	Linoleic acid metabolism; PPAR signaling pathway	Metabolism;Organismal Systems	Lipid metabolism;Endocrine system	Lipids and lipid-like molecules	Fatty Acyls	Lineolic acids and derivatives	6.1219	6.1777	6.1595	6.515	6.0848	6.9406	6.9654	6.9802	7.0336	7.0644	6.9386	7.024	6.9655	6.9191	6.9542	7.0399	7.0418	7.0758	7.0481	6.9988	7.005	7.069	7.1657	6.9764	7.0213	6.9505
neg_5058	Kinetensin 1-3	metab_13741	-	HMDB0012983	379.21	neg	M+Na-2H	C15H30N6O4	6.3127	0.0493198	-	59	7.87047	138482-55-0	-	-	-	-	-	-	Organic acids and derivatives	Carboxylic acids and derivatives	Amino acids, peptides, and analogues	5.232	5.1395	5.1943	5.366	5.3208	5.854	5.8744	5.9128	5.7985	5.8365	5.856	5.8722	5.8674	5.8538	5.8195	5.9372	5.9285	5.9372	5.9398	5.9119	5.9235	6.046	5.9813	6.0098	5.9713	6.0538
neg_5097	5-trans PGF2alpha	metab_13780	-	-	353.233	neg	M-H	C20H34O5	6.2853	0.0354987	57.6	-	-0.384601	-	-	-	-	-	-	-	-	-	-	5.5394	5.5145	5.6373	5.4516	5.5838	6.0191	6.009	6.0204	6.0951	6.0261	6.1066	6.1337	6.0095	6.0579	6.0657	6.0429	6.0596	6.0778	6.0651	6.0571	6.0066	6.031	6.0825	6.0402	6.0335	6.0575
neg_5126	13,14-Dihydro-15-keto-PGE2	metab_13808	C04671	HMDB0002776;LMFA03010031	351.217	neg	M-H	C20H32O5	6.251	0.0634306	72	-	-2.03187	363-23-5	-	-	-	-	-	-	Lipids and lipid-like molecules	Fatty Acyls	Eicosanoids	5.2743	5.2766	5.3531	5.2844	5.3203	5.4948	5.5277	5.4736	5.5108	5.4818	5.4048	5.4638	5.3672	5.4272	5.432	5.5182	5.4736	5.4914	5.5087	5.4883	5.5136	5.5706	5.632	5.5848	5.542	5.5869
neg_5146	Nummularine B	metab_13828	-	HMDB0029334	590.298	neg	M-H	C32H41N5O6	6.2304	0.0805793	-	68.6	-1.31844	53947-96-9	-	-	-	-	-	-	Organic acids and derivatives	Carboxylic acids and derivatives	Amino acids, peptides, and analogues	5.285	5.6499	5.5926	5.4769	5.3221	5.3057	5.4428	5.5167	5.5463	5.5686	5.8329	5.4766	5.6965	5.5564	5.6657	5.7068	5.6048	5.5816	5.7432	5.497	5.4649	5.5043	5.5997	5.5816	5.6353	5.607
neg_5151	2-Carboxy-4-dodecanolide	metab_13833	-	HMDB0030987	241.144	neg	M-H	C13H22O4	6.2304	0.0130417	-	50.1	-0.837237	-	-	-	-	-	-	-	Organoheterocyclic compounds	Lactones	Gamma butyrolactones	4.7588	4.7581	4.7273	4.6776	4.7001	5.2698	5.2809	5.0801	5.2626	5.2151	5.1186	5.0703	5.0901	5.1073	5.1038	5.5777	5.5718	5.5639	5.5919	5.6124	5.8564	5.9626	5.8948	5.8618	5.7765	6.1512
neg_5163	3-Epinobilin	metab_13845	-	HMDB0036690	391.176	neg	M+FA-H	C20H26O5	6.2168	0.0541558	-	61.6	0.118977	-	-	-	-	-	-	-	Lipids and lipid-like molecules	Prenol lipids	Terpene lactones	4.6958	4.5334	4.6235	4.5988	4.6044	5.7328	5.5128	5.2448	5.8926	5.9507	5.7992	6.0337	5.8535	5.8521	5.9881	5.9363	6.055	6.3254	6.0091	5.8668	5.6283	5.4623	5.4616	5.4815	5.3331	4.8063
neg_5187	Prostaglandin E2	metab_13869	C00584	HMDB0001220;LMFA03010003	397.221	neg	M+FA-H	C20H32O5	6.1894	0.0544543	-	53.3	-6.05513	363-24-6	Lipids	Eicosanoids	map01100;map04921;map05143;map05146;map04750;map05200;map00590;map05323;map04976;map04923;map04024;map04080;map05165;map04924;map04625;map04726;map05140;map05163	Metabolic pathways; Oxytocin signaling pathway; African trypanosomiasis; Amoebiasis; Inflammatory mediator regulation of TRP channels; Pathways in cancer; Arachidonic acid metabolism; Rheumatoid arthritis; Bile secretion; Regulation of lipolysis in adipocytes; cAMP signaling pathway; Neuroactive ligand-receptor interaction; Human papillomavirus infection; Renin secretion; C-type lectin receptor s…	Metabolism;Organismal Systems;Human Diseases;Human Diseases;Organismal Systems;Human Diseases;Metabolism;Human Diseases;Organismal Systems;Organismal Systems;Environmental Information Processing;Environmental Information Processing;Human Diseases;Organismal Systems;Organismal Systems;Organismal Systems;Human Diseases;Human Diseases	Global and overview maps;Endocrine system;Infectious disease: parasitic;Infectious disease: parasitic;Sensory system;Cancer: overview;Lipid metabolism;Immune disease;Digestive system;Endocrine system;Signal transduction;Signaling molecules and interaction;Infectious disease: viral;Endocrine system;Immune system;Nervous system;Infectious disease: parasitic;Infectious disease: viral	Lipids and lipid-like molecules	Fatty Acyls	Eicosanoids	5.5837	5.5156	5.5476	5.6275	5.9056	5.9056	5.9415	5.9595	5.9236	5.8465	5.8658	5.8649	5.887	5.8489	5.8481	5.9773	5.9378	5.9257	5.9508	5.9561	5.9725	6.0305	5.9649	6.0001	6.001	6.0741
neg_5197	(x)-2-Heptanol glucoside	metab_13879	-	HMDB0035028	259.155	neg	M-H2O-H	C13H26O6	6.1826	0.0235348	-	55.3	-0.369657	-	-	-	-	-	-	-	Lipids and lipid-like molecules	Fatty Acyls	Fatty acyl glycosides	4.6845	4.5612	4.5979	4.6039	4.6536	5.3438	5.3819	5.282	5.4498	5.3719	5.4291	5.4561	5.4344	5.4677	5.4178	5.6077	5.5783	5.5836	5.6079	5.5433	5.6189	5.6937	5.637	5.659	5.697	5.7899
neg_5211	Blumenol C glucoside	metab_13893	-	HMDB0040668	393.19	neg	M+Na-2H	C19H32O7	6.1687	0.13708	-	70.8	1.91183	62512-23-6	-	-	-	-	-	-	Lipids and lipid-like molecules	Fatty Acyls	Fatty acyl glycosides	5.3165	5.344	5.2461	5.2717	5.0648	5.606	5.7099	5.4389	5.762	5.5773	5.3812	5.461	5.2925	5.3158	5.3272	5.1558	5.2986	5.1424	5.0767	5.1804	5.2111	5.1794	5.1961	5.1119	5.0392	5.1534
neg_5243	9,10,16-trihydroxy palmitic acid	metab_13925	-	LMFA01050101	303.218	neg	M-H	C16H32O5	6.1413	0.0343464	51.2	-	-0.0882066	-	-	-	-	-	-	-	-	-	-	3.3456	3.7535	3.1959	3.1515	3.5351	5.172	5.1826	5.1677	5.2935	5.1229	5.5755	5.5581	5.6223	5.6533	5.6464	5.9134	5.8627	5.8774	5.8982	5.8644	5.8527	5.9624	5.9385	5.8851	5.8602	6.0772
neg_5254	6,7-dihydroxy-5-methoxy-2-(4-methoxyphenyl)-4H-chromen-4-one	metab_13936	-	HMDB0128585	313.072	neg	M-H	C17H14O6	6.1276	0.0704208	-	63.7	0.449352	-	-	-	-	-	-	-	Phenylpropanoids and polyketides	Flavonoids	O-methylated flavonoids	3.7749	3.3859	3.3849	3.3405	3.3968	5.5683	5.2623	5.1258	4.9884	5.1543	4.266	4.9737	4.9477	5.285	5.0104	5.3113	4.9528	4.613	4.7959	4.9749	4.4869	4.9396	4.5908	4.5429	4.1457	4.7747
neg_5288	Aloe-Emodin	metab_13970	C10294	HMDB0030829;LMPK13040002;MJDBOTE0001464	269.046	neg	M-H	C15H10O5	6.1002	0.0416594	65.6	-	0.0830263	-	-	-	-	-	-	-	Benzenoids	Anthracenes	Anthraquinones	5.8874	4.857	4.8576	4.4477	4.5489	7.1811	6.6584	6.7712	6.6234	6.6651	5.84	6.6304	6.7088	7.2241	6.5774	7.0027	6.4637	6.7286	6.7993	6.2462	5.9606	6.47	6.5409	6.0121	5.8492	6.3205
neg_5306	Diosmetin	metab_13988	C10038	HMDB0029676;LMPK12110824	299.056	neg	M-H	C16H12O6	6.0858	0.0309692	89.5	-	-0.181256	520-34-3	-	-	-	-	-	-	Phenylpropanoids and polyketides	Flavonoids	O-methylated flavonoids	6.7807	5.872	5.8709	5.5546	5.7146	6.358	6.0868	6.6003	6.4226	6.0378	6.2718	6.2951	6.5623	6.5337	6.3551	6.6525	6.407	6.8261	7.054	6.2164	6.6703	6.5554	6.8887	6.7414	6.5892	7.1094
neg_5326	11-Hydroxy-9-tridecenoic acid	metab_14008	-	HMDB0035881;LMFA01050437	273.171	neg	M+FA-H	C13H24O3	6.0652	0.0147525	-	65.3	0.0241172	105798-56-9	-	-	-	-	-	-	Lipids and lipid-like molecules	Fatty Acyls	Fatty acids and conjugates	6.1677	6.1374	6.2329	6.2101	6.3514	6.4288	6.512	6.4886	6.5195	6.4212	6.5111	6.5122	6.4907	6.5313	6.5131	6.4938	6.4822	6.4883	6.4886	6.4713	6.428	6.4836	6.501	6.439	6.4292	6.561
neg_5408	Gamma-Diosphenol	metab_14090	-	HMDB0037014	213.113	neg	M+FA-H	C10H16O2	5.9208	0.022649	-	52.8	-2.53459	54783-36-7	-	-	-	-	-	-	Lipids and lipid-like molecules	Prenol lipids	Monoterpenoids	4.9088	4.9603	4.9201	4.9379	4.8708	5.4257	5.4175	5.3703	5.4249	5.3819	5.4016	5.3588	5.3718	5.3731	5.3745	5.3534	5.3781	5.3738	5.3645	5.3514	5.3293	5.3471	5.3671	5.2946	5.306	5.2717
neg_5434	Marindinin	metab_14116	-	HMDB0029504	277.108	neg	M+FA-H	C14H16O3	5.8521	0.0936044	-	70.9	-0.357807	587-63-3	-	-	-	-	-	-	Phenylpropanoids and polyketides	Kavalactones	Not Available	5.8308	5.2711	4.9316	3.3742	4.1885	2.9971	4.279	2.9875	5.1642	3.0447	3.5587	3.0519	3.3927	3.4555	3.5831	3.1714	3.7513	3.955	3.8541	3.8768	4.0333	4.1197	4.0039	3.646	3.8501	3.9449
neg_5518	KOPARIN 2'-METHYL ETHER	metab_14200	-	-	313.072	neg	M-H	C17H14O6	5.584	0.0298319	61.5	-	0.0769208	-	-	-	-	-	-	-	-	-	-	3.834	3.2117	3.7306	3.2402	3.5942	5.2027	4.9986	5.2794	4.965	4.9878	5.1628	5.2759	5.2603	5.1723	5.2594	5.3211	5.3454	5.3664	5.3991	5.3477	5.3721	5.3725	5.4084	5.3059	5.333	5.3974
neg_5524	Parthenin	metab_14206	C09523	LMPR0103420001	261.113	neg	M-H	C15H18O4	5.5634	0.0474975	50.1	-	-0.365648	-	-	-	-	-	-	-	-	-	-	5.0746	5.377	5.3067	4.6805	4.6145	4.469	4.5429	4.4693	4.9563	4.3997	4.6092	4.2911	4.5373	4.5101	4.4896	4.6127	4.5588	4.5586	4.5632	4.4733	4.4414	4.5282	4.64	4.335	4.5902	4.5759
neg_5527	3-hydroxy-2-(phenylmethylidene)heptanal	metab_14209	-	HMDB0133156	217.123	neg	M-H	C14H18O2	5.5565	0.0406797	-	52.2	-1.96147	-	-	-	-	-	-	-	Phenylpropanoids and polyketides	Cinnamaldehydes	Not Available	5.7223	5.9923	5.9358	4.7509	5.187	4.2027	4.7428	4.0554	5.5786	4.3338	3.5471	4.2314	4.2072	4.0911	4.2998	3.6118	4.1191	3.9236	3.8128	4.3846	3.7741	4.0286	3.9937	3.776	3.6288	3.8054
neg_5565	12-Oxo-20-trihydroxy-leukotriene B4	metab_14247	-	LMFA03020050;HMDB0012553	381.192	neg	M-H	C20H30O7	5.4534	0.0498513	-	73.2	-0.125885	-	-	-	-	-	-	-	Lipids and lipid-like molecules	Fatty Acyls	Eicosanoids	5.0153	5.3061	5.223	5.2771	5.037	5.5337	5.6102	5.5782	5.6541	5.5632	5.7753	5.5718	5.6313	5.6334	5.6081	5.6379	5.5952	5.5948	5.6199	5.5966	5.6524	5.6581	5.6676	5.6479	5.6623	5.6379
neg_5575	Phenethyl rutinoside	metab_14257	-	HMDB0032622	465.154	neg	M+Cl	C20H30O10	5.4146	0.127154	-	84	0.569277	88510-08-1	-	-	-	-	-	-	Organic oxygen compounds	Organooxygen compounds	Carbohydrates and carbohydrate conjugates	5.2705	5.2216	5.2352	5.3663	5.2807	4.8529	3.4182	4.7514	3.9541	4.5746	4.3806	4.3211	4.0225	4.0453	4.3403	3.4735	3.4555	3.4565	3.4557	3.4646	3.4931	3.4885	3.4765	3.4959	3.4868	3.4923
neg_5577	Glucosyl (E)-2,6-Dimethyl-2,5-heptadienoate	metab_14259	-	HMDB0035136	353.103	neg	M+K-2H	C15H24O7	5.4077	0.0849146	-	80.2	7.04091	261949-43-3	-	-	-	-	-	-	Organic oxygen compounds	Organooxygen compounds	Carbohydrates and carbohydrate conjugates	4.3465	4.7532	4.9399	4.5096	4.9449	5.3757	5.3563	5.615	5.0731	5.1885	5.3548	5.406	5.4615	5.428	5.3806	5.3452	5.383	5.5037	5.3552	5.4279	5.1493	4.9917	5.2149	4.8423	5.3044	4.5039
neg_5578	Delta-CEHC	metab_14260	-	-	249.113	neg	M-H	C14H18O4	5.4077	0.0545723	59.3	-	-0.605363	-	-	-	-	-	-	-	-	-	-	5.2952	5.2886	5.2111	5.3325	5.1576	4.8073	4.291	4.7598	4.4941	4.5672	4.5192	4.4987	4.4564	4.3675	4.5681	3.899	4.0723	4.0889	3.8879	4.0529	3.6185	3.933	4.0729	3.9363	4.1035	3.7688
neg_5595	[(16R)-5,7,10-trihydroxy-8,8,10,12,16-pentamethyl-3-[1-(2-methyl-1,3-thiazol-4-yl)prop-1-en-2-yl]-9-oxo-17-oxa-4-azabicyclo[14.1.0]heptadec-4-en-11-yl]oxidanesulfonic acid	metab_14277	-	HMDB0127560	583.219	neg	M-H2O-H	C27H42N2O9S2	5.3458	0.0176345	-	71.3	6.17969	-	-	-	-	-	-	-	Organoheterocyclic compounds	Azoles	Thiazoles	4.3317	4.5842	4.9175	4.5506	4.6057	5.9636	5.5045	6.2927	4.7829	5.188	5.5482	5.2844	5.8548	5.5492	5.4878	5.6702	5.6894	5.6924	5.7108	5.6334	6.1174	5.6358	5.5869	5.1219	5.6339	5.2485
neg_5648	(S)-3-Octanol glucoside	metab_14330	-	HMDB0032958	273.171	neg	M-H2O-H	C14H28O6	5.1727	0.0139345	-	58.9	-0.0372902	129742-31-0	-	-	-	-	-	-	Lipids and lipid-like molecules	Fatty Acyls	Fatty acyl glycosides	5.5246	5.4424	5.5417	5.4259	5.7979	5.8367	5.9138	5.8906	5.8631	5.822	5.9139	5.9273	5.9217	5.9504	5.9509	5.9676	5.9325	5.9311	5.9499	5.9399	5.9655	6.0232	6.0336	5.9584	5.96	6.1306
neg_5657	3-[4-hydroxy-3-(4-hydroxy-3-methylbut-2-en-1-yl)phenyl]prop-2-enoic acid	metab_14339	-	HMDB0135890	293.103	neg	M+FA-H	C14H16O4	5.1323	0.225111	-	73.3	0.270223	-	-	-	-	-	-	-	Phenylpropanoids and polyketides	Cinnamic acids and derivatives	Hydroxycinnamic acids and derivatives	4.6468	4.9397	5.1214	4.1342	4.3506	3.5	3.6842	3.4916	4.3725	3.6747	4.0334	3.6675	3.8648	3.5243	3.4043	3.4436	3.1505	3.741	3.4501	3.4669	3.9764	4.0589	3.9339	3.8264	3.7781	3.6783
neg_5667	E-3179	metab_14348	-	HMDB0013846	885.284	neg	2M+FA-H	C22H21ClN6O	5.0979	0.0878701	-	79.7	-8.7263	-	-	-	-	-	-	-	Benzenoids	Benzene and substituted derivatives	Biphenyls and derivatives	3.6008	5.2415	5.9337	4.3403	5.0617	5.4192	5.3268	4.2718	5.7542	5.5682	5.399	3.7897	5.7725	5.3774	5.6755	4.988	5.5955	5.4377	5.4692	5.7284	5.4318	5.4878	4.9244	4.7383	5.8693	4.0951
neg_5668	3-Oxo-alpha-ionol 9-[apiosyl-(1->6)-glucoside]	metab_14349	-	HMDB0040672	547.24	neg	M+FA-H	C24H38O11	5.0979	0.0864296	-	54	0.815328	143363-62-6	-	-	-	-	-	-	Lipids and lipid-like molecules	Fatty Acyls	Fatty acyl glycosides	6.0024	6.1301	6.0345	6.1392	5.9208	4.1678	4.7548	4.7632	4.8261	5.3782	4.8055	4.3929	4.9903	4.4229	4.2869	4.0302	4.6318	4.381	4.3497	4.7395	3.8341	4.0821	3.5568	4.117	5.1144	3.5676
neg_5692	(-)-Wikstromol	metab_14373	C10725	HMDB0030598	419.135	neg	M+FA-H	C20H22O7	5.025	0.0312217	-	85.2	0.252167	34444-37-6	-	-	-	-	-	-	Lignans, neolignans and related compounds	Furanoid lignans	Tetrahydrofuran lignans	2.8195	2.8402	3.1522	2.7948	2.8511	4.4637	4.5885	4.6087	3.9743	3.9432	4.8327	4.9627	4.9418	4.989	4.9572	5.1524	5.1437	5.1966	5.1374	5.236	5.3393	5.2218	5.2503	5.1488	5.4013	4.785
neg_5701	Protopine	metab_14382	C05189	HMDB0003920	398.124	neg	M+FA-H	C20H19NO5	4.9906	0.0236366	-	64.5	-0.224804	130-86-9	-	-	map00950;map01100;map01110;map01063	Isoquinoline alkaloid biosynthesis; Metabolic pathways; Biosynthesis of secondary metabolites; Biosynthesis of alkaloids derived from shikimate pathway	Metabolism;Metabolism;Metabolism;Metabolism	Biosynthesis of other secondary metabolites;Global and overview maps;Global and overview maps;Chemical structure transformation maps	Alkaloids and derivatives	Protopine alkaloids	Not Available	3.0148	3.0355	3.0344	2.99	3.0464	4.7333	4.8791	4.7145	4.2741	4.0679	3.208	5.1002	5.2026	5.7493	5.0425	5.7041	5.1878	5.0625	5.1561	5.1401	4.3735	5.337	4.8995	4.1647	4.0917	5.0666
neg_5708	6-[1-(3,4-dimethoxyphenyl)-2-{[3-(3,4-dimethoxyphenyl)-1-hydroxyprop-2-en-1-ylidene]amino}ethoxy]-3,4,5-trihydroxyoxane-2-carboxylic acid	metab_14389	-	HMDB0135487	562.193	neg	M-H	C27H33NO12	4.9493	0.0276374	-	59.3	0.679946	-	-	-	-	-	-	-	Benzenoids	Benzene and substituted derivatives	Methoxybenzenes	5.177	6.2244	6.5727	5.651	6.0096	5.9931	6.2006	5.8417	6.0134	6.6576	6.3311	5.6183	6.4673	6.4753	5.8392	5.9823	6.3801	6.4698	6.3817	6.6156	5.8499	6.1823	5.6829	6.0122	6.7075	5.8037
neg_5710	3,3'-Dihydroxy-4',5,7-trimethoxyflavan	metab_14391	-	HMDB0030664	331.119	neg	M-H	C18H20O6	4.9425	0.130033	-	63.5	0.679055	105330-59-4	-	-	-	-	-	-	Phenylpropanoids and polyketides	Flavonoids	Flavans	4.1746	4.1671	4.1685	4.2024	3.9102	3.1594	2.3028	2.3717	1.9946	1.9741	4.1271	3.4341	4.4322	4.3654	4.4799	5.0787	5.0254	5.062	5.0838	5.1034	5.1169	5.2238	5.2006	5.1626	5.1415	4.639
neg_5729	2-(acetylamino)-1,5-anhydro-2-deoxy-4-O-b-D-galactopyranosyl-D-arabino-Hex-1-enitol	metab_14410	-	HMDB0002282	400.104	neg	M+Cl	C14H23NO10	4.8884	0.0776124	-	52.3	5.76212	868264-13-5	-	-	-	-	-	-	Organic oxygen compounds	Organooxygen compounds	Carbohydrates and carbohydrate conjugates	2.5391	2.3712	2.8543	2.836	1.0911	4.4243	4.1655	5.0423	4.0248	3.9463	4.5042	4.4729	4.8038	4.6557	4.6564	5.0159	4.8824	4.8566	5.1742	4.6915	5.1383	5.0162	5.141	5.0813	4.8267	5.4908
neg_5742	1,2,10-Trihydroxydihydro-trans-linalyl oxide 7-O-beta-D-glucopyranoside	metab_14423	-	HMDB0033237	381.177	neg	M-H	C16H30O10	4.8348	0.183231	-	54.6	0.405405	219814-37-6	-	-	-	-	-	-	Organic oxygen compounds	Organooxygen compounds	Carbohydrates and carbohydrate conjugates	5.1503	5.2468	5.212	5.2218	5.0956	2.9716	2.9732	2.962	2.965	2.9444	2.9806	2.9762	2.9723	2.9758	3.2823	3.2123	3.043	3.0641	3.2937	3.0454	3.0548	3.0435	3.0315	3.0509	3.0417	3.0473
neg_5743	3-Indolebutyric acid	metab_14424	C11284	HMDB0002096	248.092	neg	M+FA-H	C12H13NO2	4.8348	0.198653	-	50.2	-1.64868	133-32-4	-	-	-	-	-	-	Organoheterocyclic compounds	Indoles and derivatives	Indoles	0.3899	0.1909	0.6484	0.7101	0.6954	0.2564	0.2571	0.2521	0.2535	0.2444	2.6792	0.2584	2.817	0.2746	0.2622	2.922	0.2742	2.9561	0.578	2.8505	4.6343	4.6878	4.6728	4.8779	4.9704	5.1647
neg_5763	Biotripyrrin-b	metab_14444	-	HMDB0003324	500.156	neg	M+Cl	C25H27N3O6	4.766	0.0295874	-	62.7	-6.25474	158598-18-6	-	-	-	-	-	-	Organoheterocyclic compounds	Pyrroles	Substituted pyrroles	6.0828	6.2214	6.2569	6.1634	6.2979	5.8544	5.9762	6.1797	5.7381	5.8654	5.996	6.0834	5.9944	6.0523	5.9362	5.7607	5.7839	5.8571	5.7819	5.857	5.6559	5.5785	5.7281	5.3519	5.8386	5.2771
neg_5768	(1Z)-2-hydroxy-1-(4-methoxyphenyl)-4-methylpent-1-en-3-one	metab_14449	-	HMDB0132933	265.108	neg	M+FA-H	C13H16O3	4.7591	0.0295515	-	60.5	-0.220818	-	-	-	-	-	-	-	Benzenoids	Phenol ethers	Anisoles	5.1822	5.0034	4.4853	3.4399	3.4575	2.8567	4.0082	3.3161	4.2984	2.8294	3.1544	2.8612	3.4168	2.8609	2.8697	2.9135	3.0566	3.273	3.0151	3.3009	3.753	3.6177	3.7099	3.6106	3.811	2.9466
neg_5778	O-Desmethylvenlafaxine glucuronide	metab_14459	-	HMDB0061172	392.172	neg	M-H2O-H	C20H29NO8	4.7385	0.0282911	-	79	0.203247	1021933-98-1	-	-	-	-	-	-	-	-	-	6.0021	6.022	6.01	6.0658	5.9834	6.0051	6.0681	5.9393	6.0078	5.992	6.0749	6.0119	6.0187	6.0597	6.0195	6.0734	6.0345	6.0445	6.033	6.0712	6.09	6.1039	6.114	6.0935	6.103	6.1019
neg_5792	2''-Methoxy-(S)-oleuropein	metab_14473	-	HMDB0035445	551.178	neg	M-H2O-H	C26H34O14	4.6903	0.0107356	-	64.2	0.855396	256498-10-9	-	-	-	-	-	-	Lipids and lipid-like molecules	Prenol lipids	Terpene glycosides	6.3068	6.3515	6.2723	6.3516	6.5301	4.4205	4.2078	5.3263	4.7976	4.8701	3.9291	3.3871	3.9763	3.9857	3.8356	2.9054	2.8874	2.8884	2.8876	3.9034	2.925	2.9204	2.9084	2.9278	4.7273	2.9242
neg_5813	Corchoionoside B	metab_14494	-	HMDB0030975	445.172	neg	M+FA-H	C19H28O9	4.6358	0.0338676	-	63.8	0.386908	189344-54-5	-	-	-	-	-	-	Lipids and lipid-like molecules	Fatty Acyls	Fatty acyl glycosides	5.733	6.0822	5.9675	5.9904	5.7917	5.4651	5.4846	5.4864	5.5825	5.5304	5.4669	5.0312	5.266	5.2284	5.1821	4.743	4.7404	4.7331	4.6685	4.881	3.8341	4.1238	4.2902	3.8643	4.3569	3.5695
neg_5817	11-Hydroxy-12-methoxydihydrokawain	metab_14498	-	HMDB0030766	277.108	neg	M-H	C15H18O5	4.622	0.0596625	-	74	-0.255458	38146-59-7	-	-	-	-	-	-	Phenylpropanoids and polyketides	Kavalactones	Not Available	6.1573	5.6172	5.1928	4.0115	4.5525	3.9924	4.8209	4.0713	5.521	4.4237	3.8527	4.3538	4.4995	4.4554	4.2912	4.1152	4.3412	4.2452	4.2165	4.4737	4.5916	4.6898	4.5583	4.396	4.5077	4.3049
neg_5823	3-(3,4-dimethoxyphenyl)-5-hydroxy-7-methoxy-8-methyl-3,4-dihydro-2H-1-benzopyran-4-one	metab_14504	-	HMDB0129573	389.124	neg	M+FA-H	C19H20O6	4.6082	0.00582912	-	75.4	0.0611352	-	-	-	-	-	-	-	Phenylpropanoids and polyketides	Isoflavonoids	O-methylated isoflavonoids	3.8621	4.3276	4.1253	3.7287	4.7762	5.8839	6.0289	6.0306	5.5425	5.6812	6.1057	6.2094	6.1478	6.2422	6.2226	6.374	6.3191	6.3823	6.3343	6.3428	6.3083	6.362	6.3489	6.3391	6.3091	6.0869
neg_5836	5,10-Methylene-THF	metab_14517	C00143	HMDB0001533	502.172	neg	M+FA-H	C20H23N7O6	4.5601	0.0360224	-	61.8	6.71018	31690-11-6	-	-	map01100;map01200;map01120;map00720;map00680;map00260;map01523;map00670	Metabolic pathways; Carbon metabolism; Microbial metabolism in diverse environments; Carbon fixation pathways in prokaryotes; Methane metabolism; Glycine, serine and threonine metabolism; Antifolate resistance; One carbon pool by folate	Metabolism;Metabolism;Metabolism;Metabolism;Metabolism;Metabolism;Human Diseases;Metabolism	Global and overview maps;Global and overview maps;Global and overview maps;Energy metabolism;Energy metabolism;Amino acid metabolism;Drug resistance: antineoplastic;Metabolism of cofactors and vitamins	Organoheterocyclic compounds	Pteridines and derivatives	Pterins and derivatives	4.1934	4.4259	3.1212	4.2693	4.6736	4.0361	3.4668	3.8154	3.2793	3.4557	5.1895	4.1104	5.3681	5.1758	5.508	6.1038	5.9939	6.0505	5.9893	6.1179	6.0855	6.2179	6.0582	6.1195	6.1043	6.4192
neg_5837	3,4,5-trihydroxy-6-({2-[4-(2-methylpropyl)phenyl]propanoyl}oxy)oxane-2-carboxylic acid	metab_14518	-	HMDB0140970	427.162	neg	M+FA-H	C19H26O8	4.5601	0.263298	-	57.5	1.42917	-	-	-	-	-	-	-	Organic oxygen compounds	Organooxygen compounds	Carbohydrates and carbohydrate conjugates	5.2205	5.307	5.2415	5.354	5.0875	4.1413	4.1429	4.1316	4.1347	4.1139	4.1502	4.1458	4.1419	4.1455	4.1542	4.1981	4.1801	4.1811	4.1803	4.1892	4.2177	4.2131	4.2012	4.2206	4.2114	4.2169
neg_5847	2-Hydroxyundecanoate	metab_14528	-	HMDB0059736	247.155	neg	M+FA-H	C11H22O3	4.5345	0.0142505	-	57	-0.980525	-	-	-	-	-	-	-	Lipids and lipid-like molecules	Fatty Acyls	Fatty acids and conjugates	4.036	3.8149	3.8344	4.0595	4.1702	6.4232	6.3999	6.2852	6.4251	6.3123	6.3974	6.4025	6.3958	6.4454	6.4335	6.5319	6.5044	6.4992	6.5233	6.4947	6.5743	6.6081	6.5963	6.5819	6.5389	6.5603
neg_5880	Stachyoside A	metab_14561	-	HMDB0039092	547.167	neg	M+Na-2H	C21H34O15	4.4466	0.0335308	-	59.5	4.87176	131862-10-7	-	-	-	-	-	-	Lipids and lipid-like molecules	Prenol lipids	Terpene glycosides	4.463	6.1019	6.3258	5.4673	5.1582	5.3153	5.0008	4.808	5.3583	6.3113	6.0384	4.9702	6.0498	5.2498	5.5722	5.6289	5.9432	5.5337	5.5276	6.1077	5.1965	5.4875	4.7817	5.0267	5.9939	4.9944
neg_5961	Gravelliferone	metab_14642	-	HMDB0030729	319.13	neg	M+Na-2H	C19H22O3	4.2954	0.0524112	-	65.5	-4.06368	21316-80-3	-	-	-	-	-	-	Phenylpropanoids and polyketides	Coumarins and derivatives	Hydroxycoumarins	5.0469	5.1553	4.9906	5.2068	5.0335	4.6036	4.5044	4.5705	4.2865	4.4667	4.7034	4.0947	4.4216	4.498	4.3647	4.6458	4.5674	4.5137	4.4915	4.481	4.3413	4.4418	4.4836	4.557	4.4644	4.3774
neg_6009	(6-{[3,4-dihydroxy-2,5-bis(hydroxymethyl)oxolan-2-yl]oxy}-3,4,5-trihydroxyoxan-2-yl)methyl (2E)-3-(4-hydroxy-3-methoxyphenyl)prop-2-enoate	metab_14690	-	HMDB0125608	517.156	neg	M-H	C22H30O14	4.1489	0.0631636	-	84.1	0.25179	-	-	-	-	-	-	-	Phenylpropanoids and polyketides	Cinnamic acids and derivatives	Hydroxycinnamic acids and derivatives	3.9458	5.1525	5.561	4.1431	4.9667	4.899	4.8745	4.3777	5.2718	5.3495	5.0916	3.4246	5.3198	5.3139	4.7537	4.869	5.1313	4.9424	5.1805	5.3644	3.4965	4.5682	3.9852	4.0814	5.5503	3.4958
neg_6044	Riboflavin reduced	metab_14725	C01007	HMDB0001557	347.102	neg	M-H	C15H16N4O6	4.0735	0.077785	-	50.3	7.28624	101652-10-2	-	-	map01100;map00740	Metabolic pathways; Riboflavin metabolism	Metabolism;Metabolism	Global and overview maps;Metabolism of cofactors and vitamins	Organoheterocyclic compounds	Pteridines and derivatives	Alloxazines and isoalloxazines	0.7349	0.7519	0.751	0.7148	0.7609	4.9298	5.089	4.9619	4.9527	4.9521	5.1289	5.153	5.1148	5.174	5.1424	5.1266	5.0254	5.0896	4.9782	5.0878	5.0039	4.8436	5.0521	4.8024	4.9258	4.69
neg_6066	3,4,5-trihydroxy-6-[4-hydroxy-3-(3-oxoprop-1-en-1-yl)phenoxy]oxane-2-carboxylic acid	metab_14747	-	HMDB0134056	679.153	neg	2M-H	C15H16O9	4.0324	0.0347005	-	73.6	2.01664	-	-	-	-	-	-	-	Organic oxygen compounds	Organooxygen compounds	Carbohydrates and carbohydrate conjugates	5.8176	5.8408	5.9376	5.9069	5.9493	5.3922	5.2917	5.3901	5.2511	5.2493	5.4485	5.4471	5.4162	5.368	5.2837	4.9734	4.9464	5.1112	5.0212	5.0624	4.8	4.0598	4.4245	4.537	4.6888	4.2446
neg_6099	Apigenin 6-C-Glucoside 8-C-Arabinoside	metab_14780	-	HMDB0029260	563.141	neg	M-H	C26H28O14	3.9499	0.0371689	52.5	-	0.825131	-	-	-	-	-	-	-	Phenylpropanoids and polyketides	Flavonoids	Flavonoid glycosides	5.6137	5.0219	5.4539	3.3168	3.5598	3.8852	4.6172	4.749	5.2667	4.6594	4.3633	4.1326	4.8343	4.9198	4.9032	5.3488	4.7938	5.0049	4.9342	5.3179	4.6924	4.8382	4.9907	4.909	4.5639	3.6016
neg_6108	Bakkenolide B	metab_14789	-	HMDB0035206	425.177	neg	M+Cl	C22H30O6	3.9293	0.0519743	-	79.8	8.21612	18455-98-6	-	-	-	-	-	-	Lipids and lipid-like molecules	Prenol lipids	Terpene lactones	5.9993	6.032	6.0082	6.1235	5.8861	2.6964	2.698	2.6868	2.6898	2.6691	2.7053	2.7009	2.697	2.7006	2.7093	2.7532	3.0845	2.7361	2.7354	2.7442	2.7727	2.7681	2.7562	2.7755	2.7664	2.7719
neg_6128	O-6-deoxy-a-L-galactopyranosyl-(1->2)-O-b-D-galactopyranosyl-(1->4)-2-(acetylamino)-1,5-anhydro-2-deoxy-D-arabino-Hex-1-enitol	metab_14809	-	HMDB0002276	546.162	neg	M+Cl	C20H33NO14	3.8757	0.0278175	-	82.2	5.08222	868264-22-6	-	-	-	-	-	-	Organic oxygen compounds	Organooxygen compounds	Carbohydrates and carbohydrate conjugates	4.7282	5.6322	5.8208	5.217	4.7764	5.9246	6.0189	6.2805	5.7469	6.0072	6.206	6.1725	6.18	5.878	6.2993	5.9586	6.1442	5.8288	5.7823	6.3037	6.1349	5.9826	5.8817	5.8592	5.928	5.7988
neg_6139	3,4,5-trihydroxy-6-{3-hydroxy-5-[(E)-2-(4-hydroxyphenyl)ethenyl]-2-[(1E)-3-methylbuta-1,3-dien-1-yl]phenoxy}oxane-2-carboxylic acid	metab_14820	-	HMDB0129028	451.136	neg	M-H2O-H	C25H26O9	3.8363	0.0225043	-	60.5	-8.34447	-	-	-	-	-	-	-	Phenylpropanoids and polyketides	Stilbenes	Stilbene glycosides	6.7211	7.1108	7.0722	6.9208	6.792	6.7958	6.7909	6.7966	6.8404	7.107	7.023	6.762	7.0646	6.8517	6.8389	6.8663	6.9171	6.7671	6.8653	6.8924	6.5557	6.4596	6.6258	6.6093	6.7515	6.6059
neg_6214	Gibberellin A43	metab_14895	-	HMDB0035046	375.145	neg	M-H2O-H	C20H26O8	3.6316	0.0669592	-	71.6	-0.258947	54605-43-5	-	-	-	-	-	-	Lipids and lipid-like molecules	Prenol lipids	Diterpenoids	3.6508	3.3832	3.222	3.262	3.6647	5.5037	5.4025	5.6911	4.8885	5.1365	5.3993	5.409	5.488	5.5144	5.4907	5.5457	5.535	5.5972	5.5405	5.5528	5.3047	5.3959	5.3649	5.3584	5.1798	4.4379
neg_6216	Nonate	metab_14897	-	HMDB0011717	233.103	neg	M+FA-H	C9H16O4	3.6316	0.0278444	-	63.6	-1.53659	-	-	-	-	-	-	-	Lipids and lipid-like molecules	Fatty Acyls	Fatty acids and conjugates	4.9036	5.095	5.0585	5.0201	4.9774	5.0888	5.0949	4.9281	5.0098	5.0059	5.04	5	5.0899	5.058	5.0716	5.0295	5.0661	5.093	5.0523	5.1162	5.0965	5.1277	5.1502	5.1496	5.1343	5.1029
neg_6226	Glutamyltryptophan	metab_14907	-	HMDB0028830	332.125	neg	M-H	C16H19N3O5	3.6025	0.105814	-	69.2	0.180142	38101-59-6	-	-	-	-	-	-	Organic acids and derivatives	Carboxylic acids and derivatives	Amino acids, peptides, and analogues	5.3436	5.3475	5.3193	5.3405	5.2667	4.0786	3.9996	3.9398	3.0471	3.9546	3.4911	3.0582	3.7649	3.7986	3.696	3.1105	3.0925	3.5961	3.0927	3.7469	3.1301	3.1255	3.1135	3.1329	3.1238	3.1293
neg_6247	Acuminoside	metab_14928	-	HMDB0029347	485.179	neg	M+K-2H	C21H36O10	3.5543	0.134523	-	75.7	-1.9734	120163-17-9	-	-	-	-	-	-	Lipids and lipid-like molecules	Prenol lipids	Terpene glycosides	5.4718	5.5269	5.3754	5.6519	5.2788	3.9117	3.8951	3.9134	4.1674	4.3332	4.5047	3.3292	4.2813	4.031	4.1744	3.6979	4.168	4.001	4.0378	4.2769	3.4166	3.0731	3.913	3.1711	3.8596	3.2227
neg_6248	3-(1-Hydroxymethyl-1-propenyl)pentanedioic acid	metab_14929	-	HMDB0033092	403.161	neg	2M-H	C9H14O5	3.5543	0.147454	-	51.2	0.822889	-	-	-	-	-	-	-	Lipids and lipid-like molecules	Fatty Acyls	Fatty acids and conjugates	5.3418	5.4239	5.284	5.416	5.1667	2.6756	2.6772	2.666	2.669	2.6484	3.1653	2.6802	2.6763	2.6798	2.6886	2.7324	2.7144	2.7154	2.7146	2.7235	2.7519	2.7474	2.7354	2.7548	2.7457	2.7512
neg_6261	Jasmolone glucoside	metab_14942	-	HMDB0032870	387.166	neg	M+FA-H	C17H26O7	3.5204	0.0523489	-	56.9	0.162604	-	-	-	-	-	-	-	Organic oxygen compounds	Organooxygen compounds	Carbohydrates and carbohydrate conjugates	6.5033	6.2451	6.3928	5.8014	5.8887	3.1754	3.177	3.1658	4.0652	3.1481	3.1844	3.1799	3.1761	3.1796	3.1883	3.2323	3.2143	3.2152	3.3015	3.2233	3.2518	3.3044	3.2353	3.2547	3.5156	3.251
neg_6269	Pantetheine	metab_14950	C00831	HMDB0003426	277.123	neg	M-H	C11H22N2O4S	3.4722	0.0143197	-	51.4	-0.625042	496-65-1	-	-	map01110;map00770;map00332	Biosynthesis of secondary metabolites; Pantothenate and CoA biosynthesis; Carbapenem biosynthesis	Metabolism;Metabolism;Metabolism	Global and overview maps;Metabolism of cofactors and vitamins;Biosynthesis of other secondary metabolites	Organic acids and derivatives	Carboxylic acids and derivatives	Amino acids, peptides, and analogues	5.6624	5.6945	5.6396	5.7015	5.7557	4.2805	4.4367	4.3381	4.3814	4.3944	4.1105	4.0315	4.3031	4.0661	3.9539	4.1058	4.2288	4.3703	4.3425	4.0679	4.2571	4.361	4.3711	4.2329	4.4755	4.082
neg_6297	Edulitine	metab_14978	-	HMDB0030179	250.072	neg	M+FA-H	C11H11NO3	3.4035	0.121964	-	57.3	-0.768088	15272-24-9	-	-	-	-	-	-	Organoheterocyclic compounds	Quinolines and derivatives	Quinolones and derivatives	3.234	3.2547	3.2537	3.2093	3.2656	3.4184	3.42	3.4087	3.4118	3.3911	3.4273	3.4229	3.419	3.4226	3.4313	4.1767	4.0765	3.9532	4.341	4.2951	4.7129	4.9745	4.9977	5.0846	4.8144	4.0275
neg_6306	N-[4'-hydroxy-(E)-cinnamoyl]-L-aspartic acid	metab_14987	-	HMDB0029234	278.067	neg	M-H	C13H13NO6	3.3828	0.0191409	-	50.3	-0.745691	-	-	-	-	-	-	-	Organic acids and derivatives	Carboxylic acids and derivatives	Amino acids, peptides, and analogues	5.7234	6.1832	6.4633	6.0306	5.9069	6.0911	5.946	5.7317	6.0343	6.4047	6.1666	5.7216	6.2778	6.055	5.9976	6.0695	6.0606	6.038	6.1274	6.0546	5.8642	5.9614	5.9948	5.8028	6.3574	5.8021
neg_6330	3,4,5-trihydroxy-6-[hydroxy(3,4,5-trihydroxyoxan-2-yl)methyl]-2-[(2E)-3-(4-hydroxyphenyl)prop-2-enoyl]-4-[3,4,5-trihydroxy-6-(hydroxymethyl)oxan-2-yl]cyclohex-2-en-1-one	metab_15011	-	HMDB0128222	595.167	neg	M-H2O-H	C27H34O16	3.3203	0.0307013	-	80.8	0.928173	-	-	-	-	-	-	-	Phenylpropanoids and polyketides	Cinnamic acids and derivatives	Hydroxycinnamic acids and derivatives	6.2632	6.2513	6.2108	6.2596	6.0082	6.1675	6.1262	6.1734	5.9778	6.092	6.2967	6.238	6.2407	6.2923	6.2933	6.2706	6.25	6.3065	6.2598	6.2605	6.2693	6.0814	6.1734	6.3225	6.0897	5.1634
neg_6333	Prenyl glucoside	metab_15014	C09808	HMDB0031876	293.124	neg	M+FA-H	C11H20O6	3.3203	0.00871187	-	66.9	-0.255445	117861-55-9	-	-	-	-	-	-	Lipids and lipid-like molecules	Fatty Acyls	Fatty acyl glycosides	6.5442	6.5803	6.5316	6.5921	6.5152	4.4323	4.921	4.889	5.2861	5.5225	5.2815	3.9926	5.4926	5.2991	5.2423	5.1409	5.3562	5.1732	5.0332	5.4905	4.8981	5.0712	4.7457	4.4919	5.4989	4.6997
neg_6355	P-Salicylic acid	metab_15036	C00156	HMDB0000500	137.024	neg	M-H	C7H6O3	3.279	0.0450766	75.9	-	-6.06869	-	-	-	map01100;map01220;map01110;map01120;map00627;map00130;map00623;map00363;map00362;map00790;map07110;map01061	Metabolic pathways; Degradation of aromatic compounds; Biosynthesis of secondary metabolites; Microbial metabolism in diverse environments; Aminobenzoate degradation; Ubiquinone and other terpenoid-quinone biosynthesis; Toluene degradation; Bisphenol degradation; Benzoate degradation; Folate biosynthesis; Benzoic acid family; Biosynthesis of phenylpropanoids	Metabolism;Metabolism;Metabolism;Metabolism;Metabolism;Metabolism;Metabolism;Metabolism;Metabolism;Metabolism;Drug Development;Metabolism	Global and overview maps;Global and overview maps;Global and overview maps;Global and overview maps;Xenobiotics biodegradation and metabolism;Metabolism of cofactors and vitamins;Xenobiotics biodegradation and metabolism;Xenobiotics biodegradation and metabolism;Xenobiotics biodegradation and metabolism;Metabolism of cofactors and vitamins;Skeleton-based classification;Chemical structure transfor…	Benzenoids	Benzene and substituted derivatives	Benzoic acids and derivatives	5.1194	5.148	5.1085	5.0323	5.0858	5.5148	5.489	5.5269	5.4391	5.4411	5.5557	5.5506	5.5453	5.6021	5.5859	5.6464	5.5983	5.6157	5.6135	5.6036	5.6798	5.6587	5.673	5.6788	5.6437	5.6392
neg_6377	Glutamylphenylalanine	metab_15058	-	HMDB0029156	293.115	neg	M-H	C14H18N2O5	3.2081	0.0283956	-	62.1	0.757898	20556-22-3	-	-	-	-	-	-	Organic acids and derivatives	Carboxylic acids and derivatives	Amino acids, peptides, and analogues	5.3515	5.4385	5.3856	5.3489	5.3982	5.1829	5.1805	5.1287	5.093	5.1826	4.8885	4.8416	4.9477	4.9314	4.8683	4.72	4.7519	4.7375	4.6381	4.7127	4.1014	4.1113	4.2944	4.0344	4.5472	2.8596
neg_6398	L-DOPA 3'-glucoside	metab_15079	-	HMDB0029452	358.114	neg	M-H	C15H21NO9	3.1459	0.195783	-	77.8	-1.13327	2275-95-8	-	-	-	-	-	-	Organic acids and derivatives	Carboxylic acids and derivatives	Amino acids, peptides, and analogues	5.0871	5.2228	5.1495	5.3515	5.0136	3.2891	3.2386	3.1538	3.5777	2.7112	3.5997	2.2936	3.4996	2.3498	3.5577	2.9391	2.388	3.3183	2.328	2.5439	2.3652	2.3607	3.2401	2.5152	2.3589	2.4104
neg_6403	Blumenol C O-[apiosyl-(1->6)-glucoside]	metab_15084	-	HMDB0031936	549.256	neg	M+FA-H	C24H40O11	3.1322	0.0479807	-	75.1	0.859061	177261-68-6	-	-	-	-	-	-	Lipids and lipid-like molecules	Fatty Acyls	Fatty acyl glycosides	6.6616	6.6864	6.6523	6.881	6.5323	3.4437	3.7677	4.5328	4.3467	4.879	4.1955	3.4125	4.6468	4.0006	3.7459	4.0118	3.5712	3.4477	3.447	4.5263	3.4844	3.4798	3.4678	3.4872	4.5954	3.4836
neg_6429	Phlorisobutyrophenone 2-glucoside	metab_15110	-	HMDB0029651	403.125	neg	M+FA-H	C16H22O9	3.0663	0.024704	-	66.9	0.249961	17004-75-0	-	-	-	-	-	-	Organic oxygen compounds	Organooxygen compounds	Carbohydrates and carbohydrate conjugates	6.1134	6.0941	6.004	6.0909	6.0409	3.5584	3.8237	3.2128	3.3493	4.0915	4.399	3.1411	4.6415	4.2202	4.0175	4.4532	4.7719	4.7375	4.632	4.7779	3.812	4.5672	4.4071	3.2158	4.9971	4.3646
neg_6436	Cynaroside A	metab_15117	-	HMDB0040532	443.192	neg	M-H	C21H32O10	3.0461	0.0149488	-	55.1	0.131032	117804-06-5	-	-	-	-	-	-	Lipids and lipid-like molecules	Prenol lipids	Terpene lactones	6.1728	6.5565	6.7183	6.3865	6.3713	5.9107	6.063	5.9564	6.4247	6.6644	6.4463	5.6725	6.693	6.4386	6.3744	6.3939	6.4722	6.2415	6.4662	6.6086	6.0642	6.0988	5.985	5.9303	6.7186	6.0051
neg_6439	3-Hydroxypicolinic acid	metab_15120	C18620	HMDB0013188	138.019	neg	M-H	C6H5NO3	3.0328	0.0213614	51	-	-6.06442	874-24-8	-	-	-	-	-	-	Organoheterocyclic compounds	Pyridines and derivatives	Pyridinecarboxylic acids and derivatives	4.28	4.2836	4.2141	4.3195	4.2746	4.8864	4.7341	4.5102	4.636	4.4728	4.7567	4.8434	4.8041	4.7714	4.8727	4.9118	4.8891	4.9607	4.9374	4.9494	5.2322	5.1072	5.132	5.1284	5.0973	5.0961
neg_6453	Orotidine	metab_15134	C01103	HMDB0000788	325.007	neg	M+K-2H	C10H12N2O8	2.9939	0.017884	-	60.1	-3.43584	314-50-1	-	-	map00240;map01100	Pyrimidine metabolism; Metabolic pathways	Metabolism;Metabolism	Nucleotide metabolism;Global and overview maps	Nucleosides, nucleotides, and analogues	Pyrimidine nucleosides	Not Available	4.9704	5.0901	5.1565	5.024	5.0141	5.3332	5.3248	5.4419	5.3307	5.4444	5.4208	5.3645	5.4804	5.4618	5.4533	5.473	5.4579	5.4812	5.4779	5.5503	5.468	5.4869	5.4493	5.3986	5.5444	5.4467
neg_6473	AESCULIN	metab_15154	C09264	HMDB0030820	339.072	neg	M-H	C15H16O9	2.9194	0.0510727	68.7	-	-0.121196	531-75-9	-	-	-	-	-	-	Phenylpropanoids and polyketides	Coumarins and derivatives	Coumarin glycosides	6.3004	6.3183	6.2925	6.3571	6.1248	3.7767	3.4017	3.7016	4.2333	4.1595	4.3232	4.7355	3.9406	4.1187	4.4281	4.2574	4.0704	4.1883	3.6171	4.5234	3.9133	3.9046	4.2329	3.9806	4.1621	4.2485
neg_6485	Tiglic acid	metab_15166	C08279	HMDB0132474;HMDB0001470;LMFA01020030	99.0442	neg	M-H	C5H8O2	2.8765	0.0245073	65.2	-	-9.49897	80-59-1	-	-	-	-	-	-	Lipids and lipid-like molecules	Fatty Acyls	Fatty acids and conjugates	4.2311	4.5167	4.364	4.3175	4.3625	4.7042	4.6556	4.5854	4.615	4.5965	4.7101	4.6315	4.6863	4.672	4.6684	4.7419	4.7124	4.7083	4.687	4.7086	4.7435	4.7392	4.7332	4.7257	4.7659	4.7525
neg_6534	3,4,5-trihydroxy-6-(2-hydroxy-6-methoxyphenoxy)oxane-2-carboxylic acid	metab_15215	-	HMDB0128037	297.062	neg	M-H2O-H	C13H16O9	2.7575	0.016766	-	89	-0.196997	-	-	-	-	-	-	-	Organic oxygen compounds	Organooxygen compounds	Carbohydrates and carbohydrate conjugates	4.9631	4.9216	4.7984	4.9009	4.9132	4.4016	4.6597	4.6114	4.4627	4.4623	4.8227	4.6354	4.6723	4.7775	4.7227	4.7324	4.7234	4.6805	4.7214	4.7005	4.5873	4.5436	4.6751	4.5896	4.6602	4.523
neg_6564	Caryoptosidic acid	metab_15245	-	HMDB0034249	373.114	neg	M-H2O-H	C16H24O11	2.6532	0.231382	-	63	0.256327	220271-92-1	-	-	-	-	-	-	Lipids and lipid-like molecules	Prenol lipids	Terpene glycosides	5.3876	5.3445	5.2821	5.3648	5.2918	2.416	2.4176	2.4064	2.4095	2.3888	2.425	2.4206	2.4167	2.4202	2.4289	3.2107	2.4548	2.4557	3.2739	2.4638	3.2189	2.4877	2.4757	2.4951	2.4859	3.1314
neg_6575	3,4-Dihydroxyphenyl ethanol	metab_15256	-	-	153.055	neg	M-H	C8H10O3	2.6326	0.0416671	73	-	-4.96028	-	-	-	-	-	-	-	-	-	-	5.2625	5.2419	5.1854	5.2979	5.1291	3.6103	3.5959	4.0432	3.3743	3.8812	3.5047	2.5549	3.2759	3.1104	3.6498	2.7334	3.755	2.7181	3.5272	3.813	3.0125	3.3236	3.4093	2.5867	3.5365	2.967
neg_6608	Threoninyl-Leucine	metab_15289	-	HMDB0029065	231.135	neg	M-H	C10H20N2O4	2.5501	0.0397923	-	61.6	-1.15346	-	-	-	-	-	-	-	Organic acids and derivatives	Carboxylic acids and derivatives	Amino acids, peptides, and analogues	5.4894	5.448	5.3834	5.48	5.3355	4.2867	4.2452	3.7145	4.073	3.7764	4.0039	4.1376	4.1809	3.7746	4.002	4.3612	4.4188	4.2059	4.4786	4.4113	4.427	4.4529	4.4589	4.575	4.5215	4.2317
neg_6646	Glutaric acid	metab_15327	C00489	HMDB0000661	131.034	neg	M-H	C5H8O4	2.4079	0.0118569	55.2	-	-6.53237	110-94-1	Organic acids	Carboxylic acids	map01100;map00310;map01120;map00071	Metabolic pathways; Lysine degradation; Microbial metabolism in diverse environments; Fatty acid degradation	Metabolism;Metabolism;Metabolism;Metabolism	Global and overview maps;Amino acid metabolism;Global and overview maps;Lipid metabolism	Organic acids and derivatives	Carboxylic acids and derivatives	Dicarboxylic acids and derivatives	5.0737	5.2303	5.1418	5.162	5.2316	5.2824	5.2753	5.1983	5.2713	5.243	5.2865	5.2243	5.29	5.3305	5.2705	5.5693	5.5591	5.5195	5.5239	5.5227	5.9743	5.8744	5.7939	5.921	5.8557	5.7745
neg_6732	3-Furoic acid	metab_15413	-	HMDB0000444	111.008	neg	M-H	C5H4O3	1.6279	0.00867504	68.6	-	-8.26127	488-93-7	-	-	-	-	-	-	Organoheterocyclic compounds	Furans	Furoic acid and derivatives	6.8046	6.7899	6.7454	6.7675	6.9417	4.6908	4.7517	4.752	4.5456	4.5531	4.282	4.2389	4.2729	4.0312	4.1795	3.9977	4.0673	4.0459	4.1761	3.9729	4.3722	4.2357	3.9679	4.3669	4.31	4.3884
neg_6758	Adenosine 3'-monophosphate	metab_15439	C01367	HMDB0003540	346.056	neg	M-H	C10H14N5O7P	1.5806	0.097833	92	-	-0.0122055	-	-	-	map01100;map00230	Metabolic pathways; Purine metabolism	Metabolism;Metabolism	Global and overview maps;Nucleotide metabolism	Nucleosides, nucleotides, and analogues	Ribonucleoside 3'-phosphates	Not Available	5.0103	5.0148	5.018	4.9526	5.2451	2.5763	2.5779	2.5667	3.7059	4.0219	2.5852	2.5808	3.5089	2.5805	2.5892	2.633	2.6151	2.616	2.6153	2.6241	2.6526	2.648	2.6361	2.6554	2.6463	2.6518
neg_6768	Bis-gamma-glutamylcysteinylbis-beta-alanine	metab_15449	-	HMDB0029413	685.184	neg	M+FA-H	C22H36N6O12S2	1.5738	0.264083	-	80	4.43301	-	-	-	-	-	-	-	Organic acids and derivatives	Peptidomimetics	Hybrid peptides	5.644	5.6659	5.5878	5.6651	5.5867	3.6404	3.642	3.6308	3.6338	3.6131	3.6494	3.6449	3.6411	3.6446	3.6534	3.6973	3.6793	3.6802	3.6795	3.6883	3.8813	4.4627	3.7003	3.7197	4.4876	5.1951
neg_6897	(2R)-1-O-beta-D-Galactopyranosylglycerol	metab_15578	-	HMDB0038664	299.098	neg	M+FA-H	C9H18O8	1.0764	0.0882755	-	72.6	-0.261202	16232-91-0	-	-	-	-	-	-	Lipids and lipid-like molecules	Glycerolipids	Glycosylglycerols	5.6379	5.5949	5.6877	5.6253	5.5156	3.3314	3.9308	3.3218	3.4926	3.5868	3.761	3.3359	3.3321	3.3356	4.1831	3.6151	3.5081	4.2457	4.1918	4.2046	3.4078	3.8577	3.3913	3.5181	4.3871	3.4071
neg_6910	2-Hydroxyadenine	metab_15591	-	HMDB0000403	150.041	neg	M-H	C5H5N5O	1.0627	0.16259	-	66.2	-5.51132	3373-53-3	-	-	-	-	-	-	Organoheterocyclic compounds	Imidazopyrimidines	Purines and purine derivatives	2.6665	2.6871	2.6861	2.6418	2.698	4.3951	4.6075	4.9596	4.5692	4.7167	3.4025	3.6013	4.0463	2.8548	3.5772	2.9074	2.8894	2.8904	2.8896	2.8985	2.9269	2.9224	2.9104	2.9298	2.9206	2.9262
neg_7158	3,4,5-trihydroxy-6-{[2,3,4-trihydroxy-5-(hydroxymethyl)oxolan-2-yl]methoxy}oxane-2-carboxylic acid	metab_15834	-	HMDB0125611	337.078	neg	M-H2O-H	C12H20O12	0.8363	0.106724	-	82.4	0.31742	-	-	-	-	-	-	-	Organic oxygen compounds	Organooxygen compounds	Carbohydrates and carbohydrate conjugates	5.8467	5.8598	5.8342	5.9011	5.8051	3.7901	3.3831	3.5634	3.3749	3.3542	3.3905	3.3861	3.3822	3.3857	3.3945	4.1255	3.7794	4.4242	4.1508	3.9781	4.4517	4.1613	3.8874	4.6821	3.4516	4.3075
neg_7209	Nepsilon-Acetyl-L-lysine	metab_15885	C02727	HMDB0000206	187.108	neg	M-H	C8H16N2O3	0.8027	0.0537945	75.9	-	-3.1186	-	-	-	map01100;map00310	Metabolic pathways; Lysine degradation	Metabolism;Metabolism	Global and overview maps;Amino acid metabolism	Organic acids and derivatives	Carboxylic acids and derivatives	Amino acids, peptides, and analogues	3.3945	3.7201	3.3248	3.4446	3.3368	4.3018	4.0944	3.9408	3.9763	4.2	4.4112	4.4787	4.5282	4.3603	4.5624	4.7271	4.7234	4.7007	4.7678	4.7677	5.0892	4.9738	4.8718	4.9729	4.9046	5.0207
neg_7247	1-Methylinosine	metab_15923	-	HMDB0002721	319.044	neg	M+K-2H	C11H14N4O5	0.7822	0.102824	-	55.3	-4.17513	2140-73-0	-	-	-	-	-	-	Nucleosides, nucleotides, and analogues	Purine nucleosides	Not Available	3.9301	4.2252	4.169	4.2677	3.8724	5.0381	5.1118	5.3151	4.923	5.3186	4.8162	5.0912	4.6793	4.9044	4.8875	4.2313	4.4726	3.9674	4.0948	3.8918	3.6828	3.6782	3.6662	3.6856	3.6765	3.682
neg_7451	L-Asparagine	metab_16127	C00152	HMDB0000168	131.045	neg	M-H	C4H8N2O3	0.6645	0.0479994	70.2	-	-6.3326	70-47-3	Peptides	Amino acids	map01100;map04978;map01110;map00460;map01230;map00250;map04974;map00970;map05230;map01060	Metabolic pathways; Mineral absorption; Biosynthesis of secondary metabolites; Cyanoamino acid metabolism; Biosynthesis of amino acids; Alanine, aspartate and glutamate metabolism; Protein digestion and absorption; Aminoacyl-tRNA biosynthesis; Central carbon metabolism in cancer; Biosynthesis of plant secondary metabolites	Metabolism;Organismal Systems;Metabolism;Metabolism;Metabolism;Metabolism;Organismal Systems;Genetic Information Processing;Human Diseases;Metabolism	Global and overview maps;Digestive system;Global and overview maps;Metabolism of other amino acids;Global and overview maps;Amino acid metabolism;Digestive system;Translation;Cancer: overview;Chemical structure transformation maps	Organic acids and derivatives	Carboxylic acids and derivatives	Amino acids, peptides, and analogues	5.4725	5.4191	5.38	5.3562	6.0246	4.1791	4.4864	4.0257	4.4629	4.482	4.5424	4.4515	4.5743	4.5767	4.5124	4.4752	4.567	4.5335	4.4774	4.6129	3.9437	4.0021	4.0666	4.077	4.2249	3.1288
neg_7602	Nomega-Acetylhistamine	metab_16278	C05135	HMDB0013253	152.082	neg	M-H	C7H11N3O	0.5821	0.061174	67.4	-	-4.93885	-	-	-	map00340	Histidine metabolism	Metabolism	Amino acid metabolism	Organic acids and derivatives	Carboxylic acids and derivatives	Carboxylic acid derivatives	2.988	3.0087	3.0077	2.9633	3.0196	4.6721	5.0928	5.1705	4.7606	5.0357	4.7534	4.1538	4.6361	4.6574	4.2295	4.801	4.5608	4.3273	4.6453	4.5822	4.1886	3.2442	3.2322	3.2516	3.2424	3.248
neg_7627	Myo-Inositol	metab_16303	C00137	HMDB0000211	179.055	neg	M-H	C6H12O6	0.5753	0.0140874	56.4	-	-3.53024	87-89-8	Carbohydrates	Monosaccharides	map01100;map01110;map01120;map00562;map00521;map02010;map00053;map00052;map04070	Metabolic pathways; Biosynthesis of secondary metabolites; Microbial metabolism in diverse environments; Inositol phosphate metabolism; Streptomycin biosynthesis; ABC transporters; Ascorbate and aldarate metabolism; Galactose metabolism; Phosphatidylinositol signaling system	Metabolism;Metabolism;Metabolism;Metabolism;Metabolism;Environmental Information Processing;Metabolism;Metabolism;Environmental Information Processing	Global and overview maps;Global and overview maps;Global and overview maps;Carbohydrate metabolism;Biosynthesis of other secondary metabolites;Membrane transport;Carbohydrate metabolism;Carbohydrate metabolism;Signal transduction	Organic oxygen compounds	Organooxygen compounds	Alcohols and polyols	6.6522	6.7181	6.7174	6.6941	6.7347	5.8892	5.7767	5.8836	5.8091	5.9237	5.8134	5.7457	5.896	5.8368	5.8166	5.8279	5.8304	5.7812	5.7946	5.8598	5.6849	5.6337	5.694	5.6735	5.8132	5.4783
neg_7628	N2-Acetyl-L-ornithine	metab_16304	C00437	HMDB0003357	173.093	neg	M-H	C7H14N2O3	0.5753	0.00758131	61.1	-	-3.61073	-	-	-	map01100;map01210;map00220;map01110;map01230	Metabolic pathways; 2-Oxocarboxylic acid metabolism; Arginine biosynthesis; Biosynthesis of secondary metabolites; Biosynthesis of amino acids	Metabolism;Metabolism;Metabolism;Metabolism;Metabolism	Global and overview maps;Global and overview maps;Amino acid metabolism;Global and overview maps;Global and overview maps	Organic acids and derivatives	Carboxylic acids and derivatives	Amino acids, peptides, and analogues	3.5499	2.7988	3.9307	2.7534	3.1916	5.4267	5.4327	5.3364	5.401	5.3459	5.2968	5.5011	5.3365	5.3445	5.4354	5.503	5.456	5.4965	5.4554	5.4503	5.5113	5.5233	5.5303	5.5306	5.5167	5.2774
neg_7658	Deoxyinosine	metab_16334	C05512	HMDB0000071	297.083	neg	M+FA-H	C10H12N4O4	0.5616	0.0895377	-	55.6	-5.18449	890-38-0	-	-	map01100;map02010;map00230	Metabolic pathways; ABC transporters; Purine metabolism	Metabolism;Environmental Information Processing;Metabolism	Global and overview maps;Membrane transport;Nucleotide metabolism	Nucleosides, nucleotides, and analogues	Purine nucleosides	Purine 2'-deoxyribonucleosides	5.445	5.4518	5.3897	5.5514	5.4	4.8544	4.7322	4.7818	4.7054	4.6702	4.5357	4.5876	4.5641	4.5094	4.5203	4.3358	4.4312	4.3723	4.3861	4.3056	3.856	3.8696	3.992	3.4806	3.6806	3.4601
neg_7711	3,4,5-trihydroxy-6-(2-hydroxyethoxy)oxane-2-carboxylic acid	metab_16387	-	HMDB0131294	237.061	neg	M-H	C8H14O8	0.541	0.0777602	-	53.6	-0.931294	-	-	-	-	-	-	-	Organic oxygen compounds	Organooxygen compounds	Carbohydrates and carbohydrate conjugates	5.8436	5.8118	5.8109	5.8224	5.8356	4.5036	4.3928	4.4719	4.2596	4.176	4.3285	4.4157	4.4343	4.4295	4.5229	4.4525	4.5661	4.5338	4.4325	4.5255	4.3179	4.2886	4.3396	4.3298	4.3494	4.3302
neg_7726	6-(2-carboxy-2-methylethoxy)-3,4,5-trihydroxyoxane-2-carboxylic acid	metab_16402	-	HMDB0126115	325.078	neg	M+FA-H	C10H16O9	0.5341	0.112628	-	67.2	0.296952	-	-	-	-	-	-	-	Organic oxygen compounds	Organooxygen compounds	Carbohydrates and carbohydrate conjugates	5.423	5.4116	5.3185	5.4026	5.4474	5.0867	5.0255	5.0661	5.0653	4.9678	4.9228	5.0437	4.8154	4.8907	4.9791	4.7992	4.8195	4.792	4.8277	4.8698	4.2815	4.2895	4.326	4.5616	4.384	3.8598
neg_7800	L-Aspartic Acid	metab_16476	C00049	HMDB0000191	132.029	neg	M-H	C4H7NO4	0.5204	0.0919633	73.8	-	-6.27353	56-84-8	Peptides;Hormones and transmitters	Amino acids;Neurotransmitters	map00997;map00270;map01200;map00250;map04974;map00410;map02030;map00770;map02010;map00710;map04080;map01064;map01060;map01100;map00220;map00300;map01120;map01210;map00340;map01230;map00260;map00261;map01110;map00760;map00460;map02020;map00970;map05230;map01070	Biosynthesis of various secondary metabolites - part 3; Cysteine and methionine metabolism; Carbon metabolism; Alanine, aspartate and glutamate metabolism; Protein digestion and absorption; beta-Alanine metabolism; Bacterial chemotaxis; Pantothenate and CoA biosynthesis; ABC transporters; Carbon fixation in photosynthetic organisms; Neuroactive ligand-receptor interaction; Biosynthesis of alkaloi…	Metabolism;Metabolism;Metabolism;Metabolism;Organismal Systems;Metabolism;Cellular Processes;Metabolism;Environmental Information Processing;Metabolism;Environmental Information Processing;Metabolism;Metabolism;Metabolism;Metabolism;Metabolism;Metabolism;Metabolism;Metabolism;Metabolism;Metabolism;Metabolism;Metabolism;Metabolism;Metabolism;Environmental Information Processing;Genetic Information…	Biosynthesis of other secondary metabolites;Amino acid metabolism;Global and overview maps;Amino acid metabolism;Digestive system;Metabolism of other amino acids;Cell motility;Metabolism of cofactors and vitamins;Membrane transport;Energy metabolism;Signaling molecules and interaction;Chemical structure transformation maps;Chemical structure transformation maps;Global and overview maps;Amino acid…	Organic acids and derivatives	Carboxylic acids and derivatives	Amino acids, peptides, and analogues	5.552	5.4835	5.4923	5.4807	5.8334	4.7447	4.5962	4.6547	4.4967	4.5349	4.284	4.5271	4.4912	4.3783	4.4817	4.3432	4.3799	4.3727	4.302	4.3585	4.1945	4.1107	4.2151	3.9918	4.1742	3.5666
neg_7848	L-Serine	metab_16524	C00065	HMDB0000187	104.034	neg	M-H	C3H7NO3	0.5067	0.126251	57.7	-	-8.72629	56-45-1	Peptides	Amino acids	map00997;map01502;map00270;map01200;map01110;map04071;map00630;map00920;map02010;map01060;map01100;map01120;map01230;map00680;map00260;map00261;map04978;map00460;map04974;map00600;map00970;map05230	Biosynthesis of various secondary metabolites - part 3; Vancomycin resistance; Cysteine and methionine metabolism; Carbon metabolism; Biosynthesis of secondary metabolites; Sphingolipid signaling pathway; Glyoxylate and dicarboxylate metabolism; Sulfur metabolism; ABC transporters; Biosynthesis of plant secondary metabolites; Metabolic pathways; Microbial metabolism in diverse environments; Biosy…	Metabolism;Human Diseases;Metabolism;Metabolism;Metabolism;Environmental Information Processing;Metabolism;Metabolism;Environmental Information Processing;Metabolism;Metabolism;Metabolism;Metabolism;Metabolism;Metabolism;Metabolism;Organismal Systems;Metabolism;Organismal Systems;Metabolism;Genetic Information Processing;Human Diseases	Biosynthesis of other secondary metabolites;Drug resistance: antimicrobial;Amino acid metabolism;Global and overview maps;Global and overview maps;Signal transduction;Carbohydrate metabolism;Energy metabolism;Membrane transport;Chemical structure transformation maps;Global and overview maps;Global and overview maps;Global and overview maps;Energy metabolism;Amino acid metabolism;Biosynthesis of o…	Organic acids and derivatives	Carboxylic acids and derivatives	Amino acids, peptides, and analogues	4.6705	4.7245	4.7454	4.6179	4.9688	2.5371	2.5387	2.8005	2.7214	3.1942	2.7664	2.5417	3.3962	2.5413	2.5501	3.3239	3.521	3.2917	2.9506	3.3543	2.6134	3.3511	2.5969	2.6162	3.5355	2.7464
neg_7870	L-Arginine	metab_16546	C00062	HMDB0000517;HMDB0062762	173.104	neg	M-H	C6H14N4O2	0.4998	0.0382236	74.9	-	-3.55384	74-79-3	Peptides	Amino acids	map01100;map00220;map00997;map05014;map05146;map00472;map02010;map00330;map00331;map01230;map01110;map04974;map00970;map00261;map05142;map05230;map01064;map04150;map01060	Metabolic pathways; Arginine biosynthesis; Biosynthesis of various secondary metabolites - part 3; Amyotrophic lateral sclerosis (ALS); Amoebiasis; D-Arginine and D-ornithine metabolism; ABC transporters; Arginine and proline metabolism; Clavulanic acid biosynthesis; Biosynthesis of amino acids; Biosynthesis of secondary metabolites; Protein digestion and absorption; Aminoacyl-tRNA biosynthesis; …	Metabolism;Metabolism;Metabolism;Human Diseases;Human Diseases;Metabolism;Environmental Information Processing;Metabolism;Metabolism;Metabolism;Metabolism;Organismal Systems;Genetic Information Processing;Metabolism;Human Diseases;Human Diseases;Metabolism;Environmental Information Processing;Metabolism	Global and overview maps;Amino acid metabolism;Biosynthesis of other secondary metabolites;Neurodegenerative disease;Infectious disease: parasitic;Metabolism of other amino acids;Membrane transport;Amino acid metabolism;Biosynthesis of other secondary metabolites;Global and overview maps;Global and overview maps;Digestive system;Translation;Biosynthesis of other secondary metabolites;Infectious d…	Organic acids and derivatives	Carboxylic acids and derivatives	Amino acids, peptides, and analogues	5.0227	5.0561	5.111	5.0294	5.3845	4.1676	3.5705	3.3401	4.0534	4.8789	4.4539	3.2892	4.9288	4.4172	4.128	4.4645	4.7533	4.4979	4.624	4.7782	4.1929	4.389	3.8851	4.0988	4.9362	4.21
neg_5659	4-Nitrophenol	metab_16792	C00870	HMDB0041950;HMDB0001232	138.019	neg	M-H	C6H5NO3	5.1254	0.0191353	87.5	-	-6.04751	100-02-7	-	-	map00627;map01120	Aminobenzoate degradation; Microbial metabolism in diverse environments	Metabolism;Metabolism	Xenobiotics biodegradation and metabolism;Global and overview maps	Benzenoids	Benzene and substituted derivatives	Nitrobenzenes	5.0134	4.9606	4.842	4.8916	5.0216	5.0738	5.0086	5.1646	5.0958	5.1455	4.7012	4.7003	4.7189	4.6224	4.6895	4.453	4.4173	4.4306	4.4834	4.4256	4.5286	4.5153	4.4514	4.4678	4.4206	4.5061
neg_340	Dulcitol	metab_16793	C01697	HMDB0011632;HMDB0000107	181.071	neg	M-H, M+FA-H	C6H14O6	0.5204	0.0187441	53.4	-	-3.50125	-	-	-	map01100;map02060;map00052	Metabolic pathways; Phosphotransferase system (PTS); Galactose metabolism	Metabolism;Environmental Information Processing;Metabolism	Global and overview maps;Membrane transport;Carbohydrate metabolism	Organic oxygen compounds	Organooxygen compounds	Carbohydrates and carbohydrate conjugates	4.9673	5.3243	5.2526	5.0637	5.1021	5.7839	5.767	6.1461	5.7229	5.9616	5.6271	5.5536	5.9935	5.7238	5.7211	5.8973	5.9503	5.8315	5.7717	5.9541	5.8778	6.0148	5.7336	5.8058	6.1442	5.9121
neg_5098	Hexadecanedioic acid	metab_16794	C19615	HMDB0000712;HMDB0000672;LMFA01170022	285.207	neg	M-H	C16H30O4	6.2853	0.00996279	56	-	-0.106495	505-54-4	-	-	map01100;map00073	Metabolic pathways; Cutin, suberine and wax biosynthesis	Metabolism;Metabolism	Global and overview maps;Lipid metabolism	Lipids and lipid-like molecules	Fatty Acyls	Fatty acid esters	5.3847	5.3439	5.3948	5.3819	5.4398	5.804	5.8255	5.8549	5.8266	5.7655	5.9388	5.9378	5.9324	5.9545	5.9897	5.988	5.9905	5.9766	6.0189	5.9818	5.9151	5.9909	5.9955	5.9637	5.9339	6.0577
neg_720	Malic acid	metab_16795	C00149	HMDB0000156	133.013	neg	M-H2O-H, M-H	C4H6O5	0.6028	0.00846369	70.9	-	-6.62799	97-67-6	Organic acids	Carboxylic acids	map01110;map05211;map01200;map00620;map00020;map00630;map04964;map00710;map04922;map01066;map01065;map04742;map01063;map01062;map01061;map01060;map01100;map01120;map05200;map00680;map01064;map00720;map02020;map05230;map01070	Biosynthesis of secondary metabolites; Renal cell carcinoma; Carbon metabolism; Pyruvate metabolism; Citrate cycle (TCA cycle); Glyoxylate and dicarboxylate metabolism; Proximal tubule bicarbonate reclamation; Carbon fixation in photosynthetic organisms; Glucagon signaling pathway; Biosynthesis of alkaloids derived from terpenoid and polyketide; Biosynthesis of alkaloids derived from histidine an…	Metabolism;Human Diseases;Metabolism;Metabolism;Metabolism;Metabolism;Organismal Systems;Metabolism;Organismal Systems;Metabolism;Metabolism;Organismal Systems;Metabolism;Metabolism;Metabolism;Metabolism;Metabolism;Metabolism;Human Diseases;Metabolism;Metabolism;Metabolism;Environmental Information Processing;Human Diseases;Metabolism	Global and overview maps;Cancer: specific types;Global and overview maps;Carbohydrate metabolism;Carbohydrate metabolism;Carbohydrate metabolism;Excretory system;Energy metabolism;Endocrine system;Chemical structure transformation maps;Chemical structure transformation maps;Sensory system;Chemical structure transformation maps;Chemical structure transformation maps;Chemical structure transformati…	Organic acids and derivatives	Hydroxy acids and derivatives	Beta hydroxy acids and derivatives	7.3685	7.404	7.3376	7.3554	7.4252	5.4536	5.4137	5.6289	5.2204	5.2472	5.1689	5.1993	5.2471	5.1878	5.2185	5.249	5.2951	5.257	5.2889	5.2881	5.2417	5.2707	5.243	5.27	5.3163	5.0927
[truncated: 8 more columns]
